# Supplementary material
Source: PubMed Central journal article supplement (PMC9733493)

# Supporting Information

## Discovery of *in vivo* active sphingosine-1-phosphate transporter (Spns2) inhibitors

*Russell Fritzscheier<sup>†</sup>, Daniel Foster<sup>†</sup>, Ashley Peralta<sup>†</sup>, Michael Payette<sup>†</sup>, Yugesh Kharel<sup>‡</sup>, Tao Huang<sup>‡</sup>, Kevin R. Lynch<sup>‡,\*</sup>, Webster L. Santos<sup>†,‡,\*</sup>*

<sup>†</sup>Department of Chemistry, Virginia Tech, Blacksburg, VA 24060, USA

<sup>‡</sup>Department of Pharmacology, University of Virginia, Charlottesville, VA 22908, USA

<sup>‡</sup>Virginia Tech Center for Drug Discovery, Virginia Tech, Blacksburg, VA 24060, USA

\*E-mail: santosw@vt.edu; krl2z@virginia.edu

### Table of Contents

|                                                                         |    |
|-------------------------------------------------------------------------|----|
| 1. Spns2 activity of select compounds.....                              | S2 |
| 2. HPLC trace for compound <b>16d</b> .....                             | S2 |
| 3. <sup>1</sup> H, <sup>13</sup> C and <sup>19</sup> F NMR spectra..... | S3 |

Spns2 activity of select compounds.

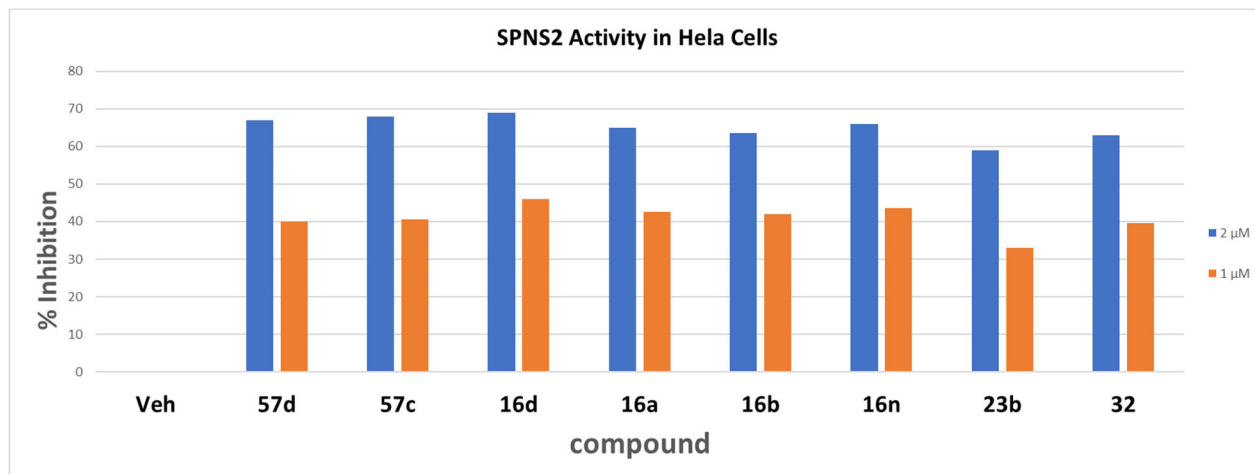

HPLC trace for Compound 16d.

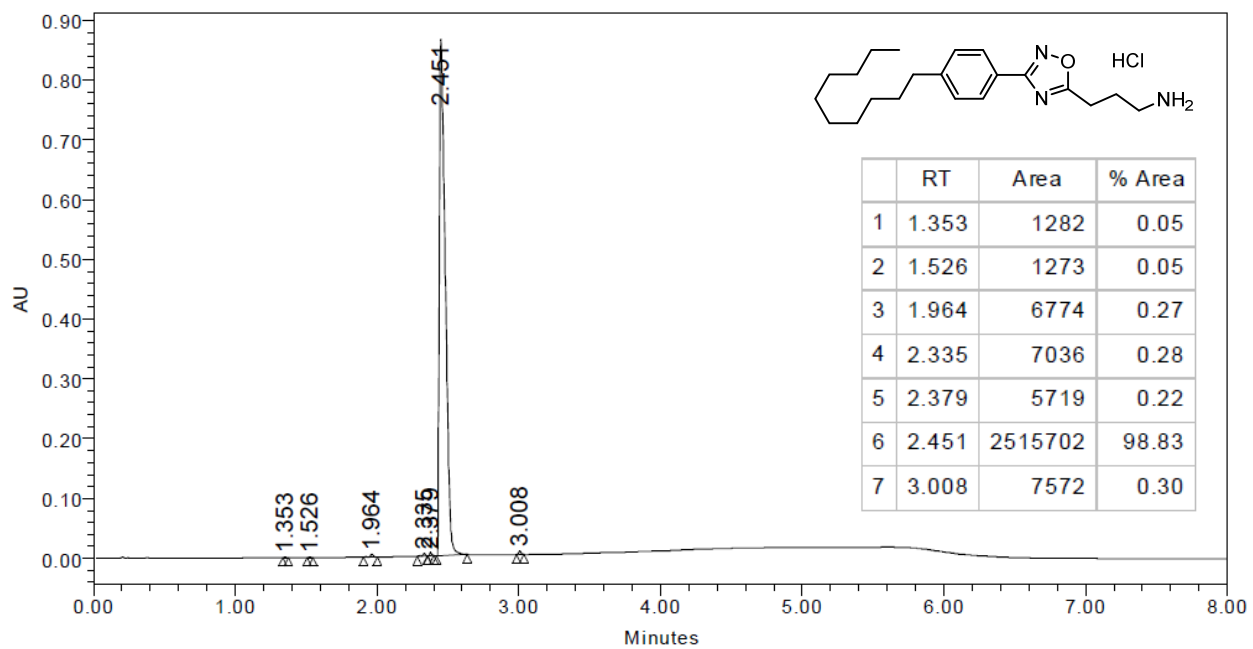

<sup>1</sup>H NMR (400 MHz, CD<sub>3</sub>OD) **16a**

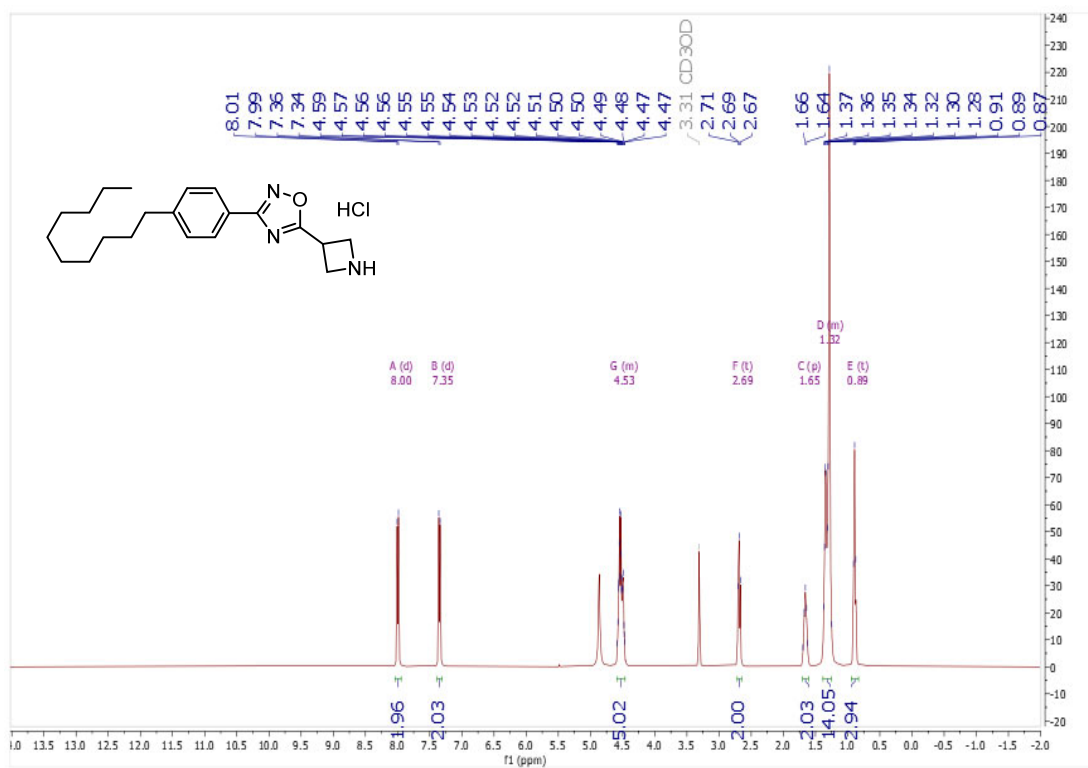

<sup>13</sup>C NMR (101 MHz, CD<sub>3</sub>OD) **16a**

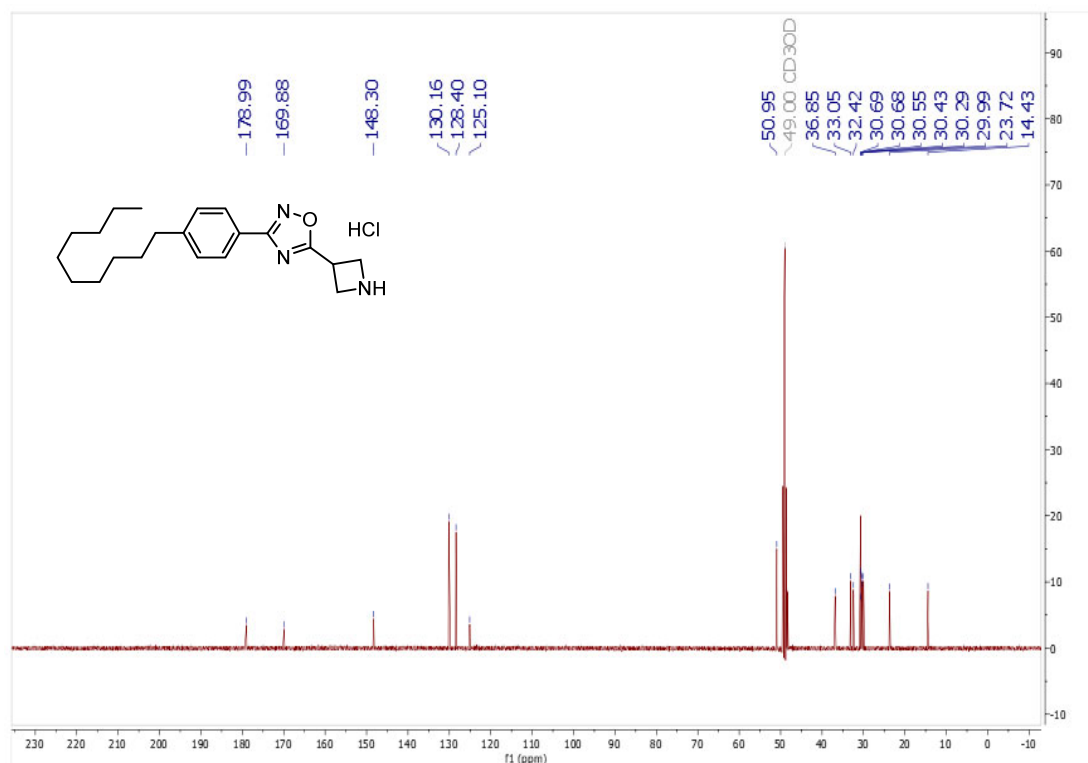

<sup>1</sup>H NMR (400 MHz, CD<sub>3</sub>OD) **16b**

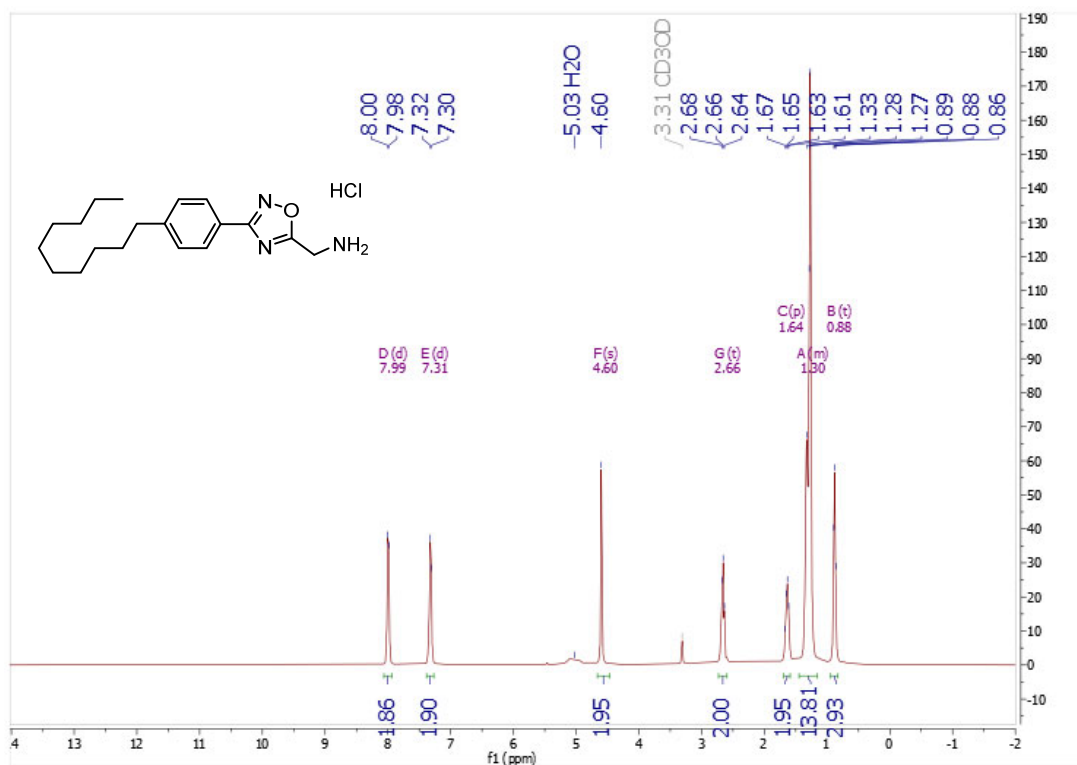

<sup>13</sup>C NMR (100 MHz, CD<sub>3</sub>OD) **16b**

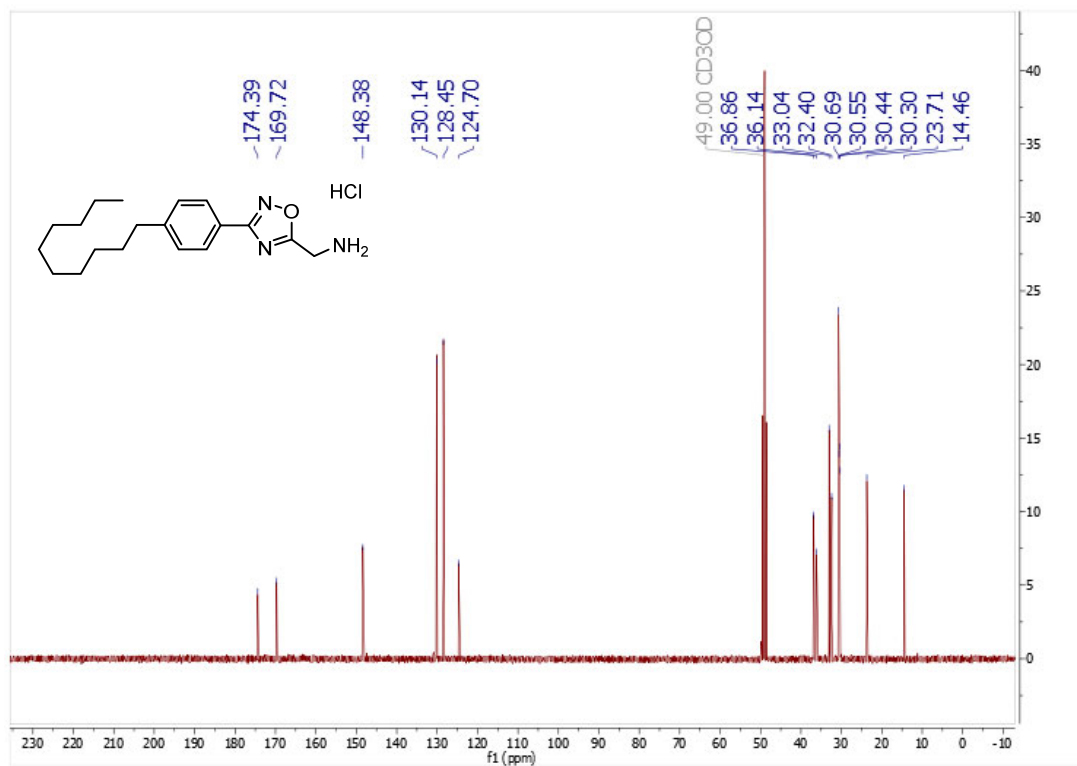

<sup>1</sup>H NMR (400 MHz, CD<sub>3</sub>OD) **16c**

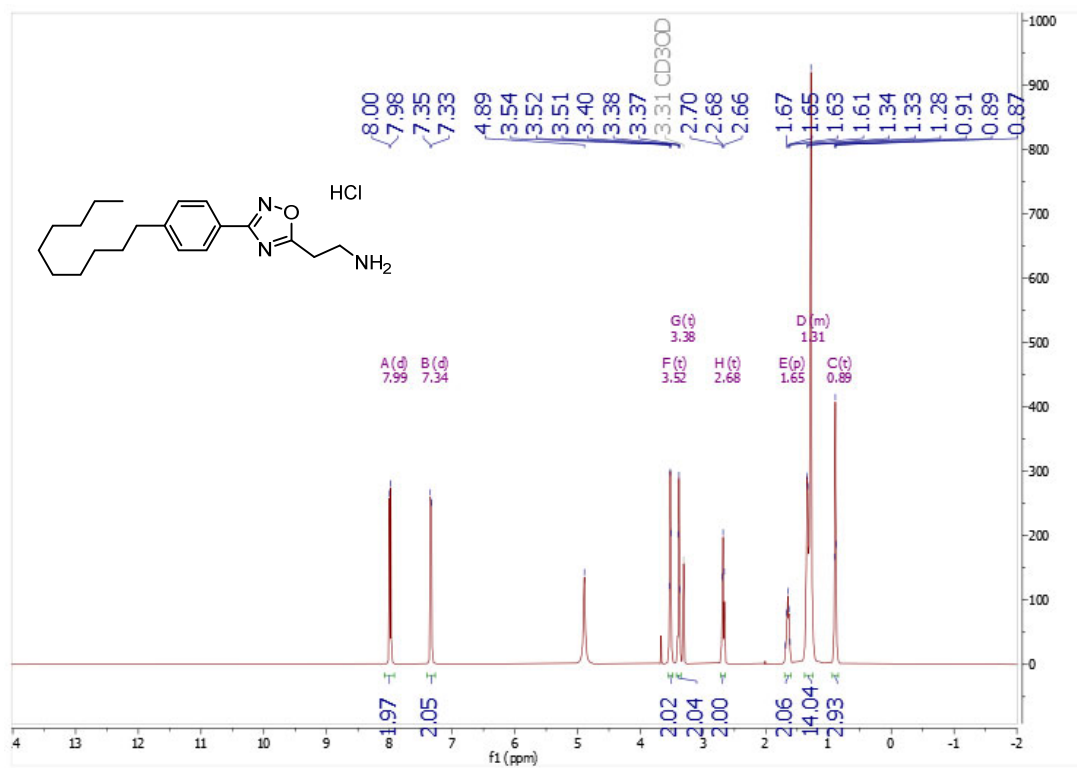

<sup>13</sup>C NMR (100 MHz, CD<sub>3</sub>OD) **16c**

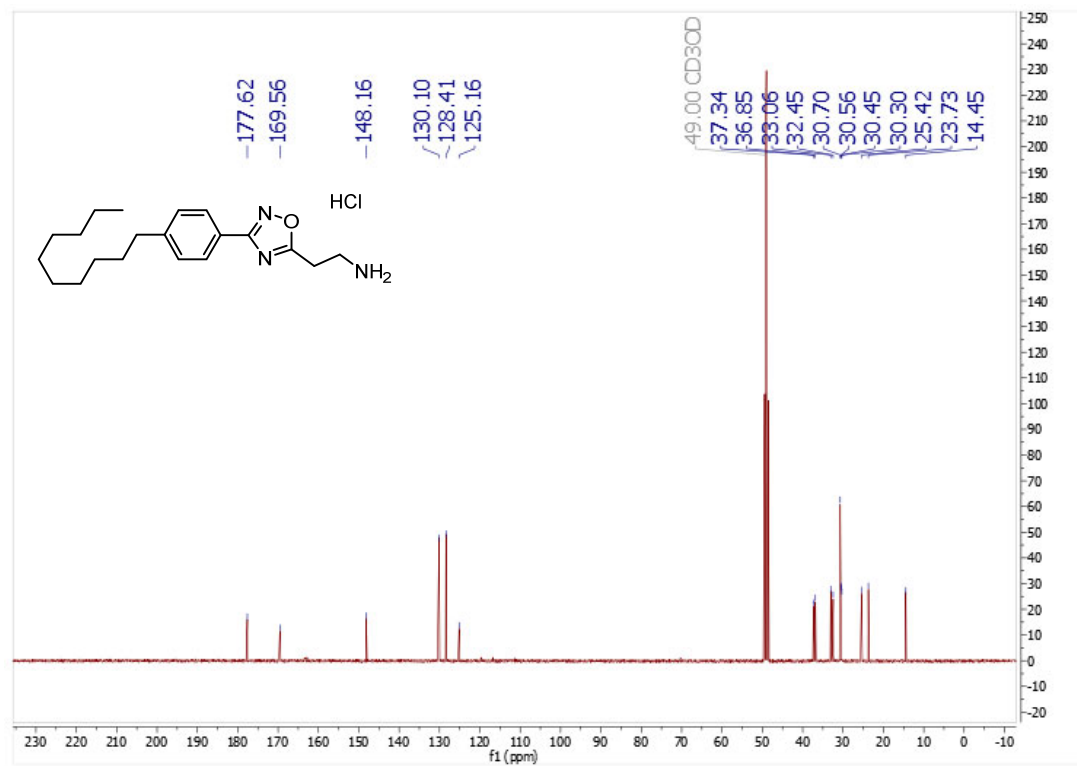

<sup>1</sup>H NMR (400 MHz, CD<sub>3</sub>OD) **16d**

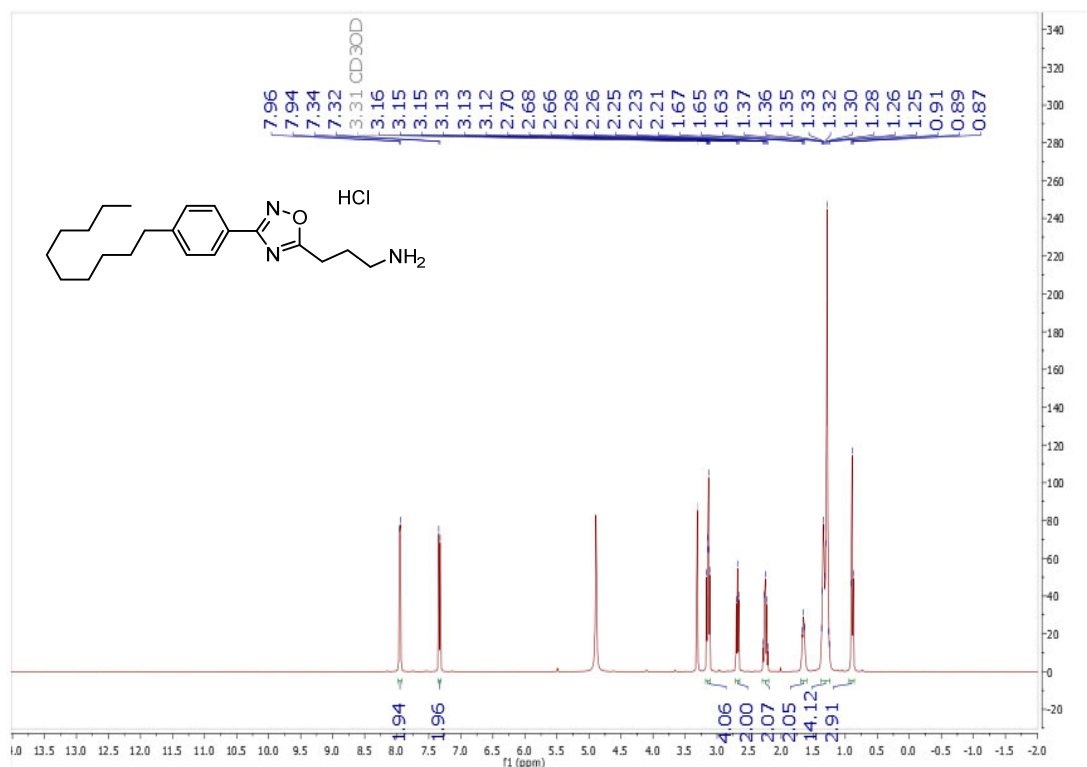

<sup>13</sup>C NMR (101 MHz, CD<sub>3</sub>OD) **16d**

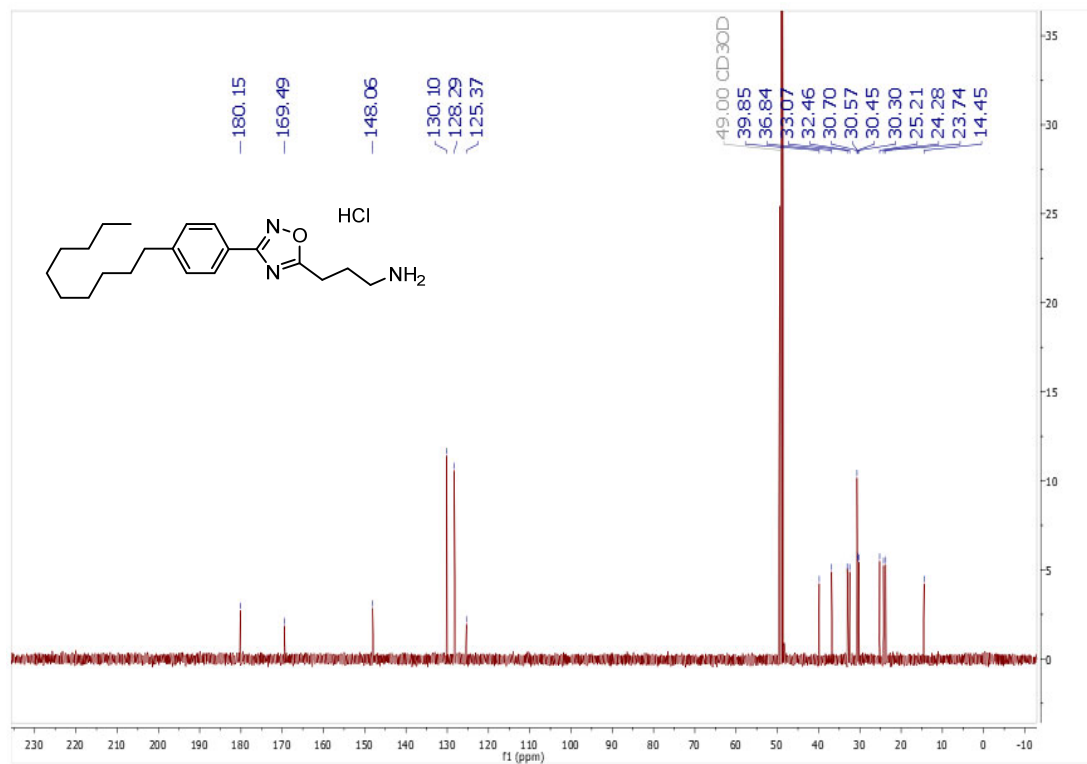

<sup>1</sup>H NMR (400 MHz, CD<sub>3</sub>OD) **16e**

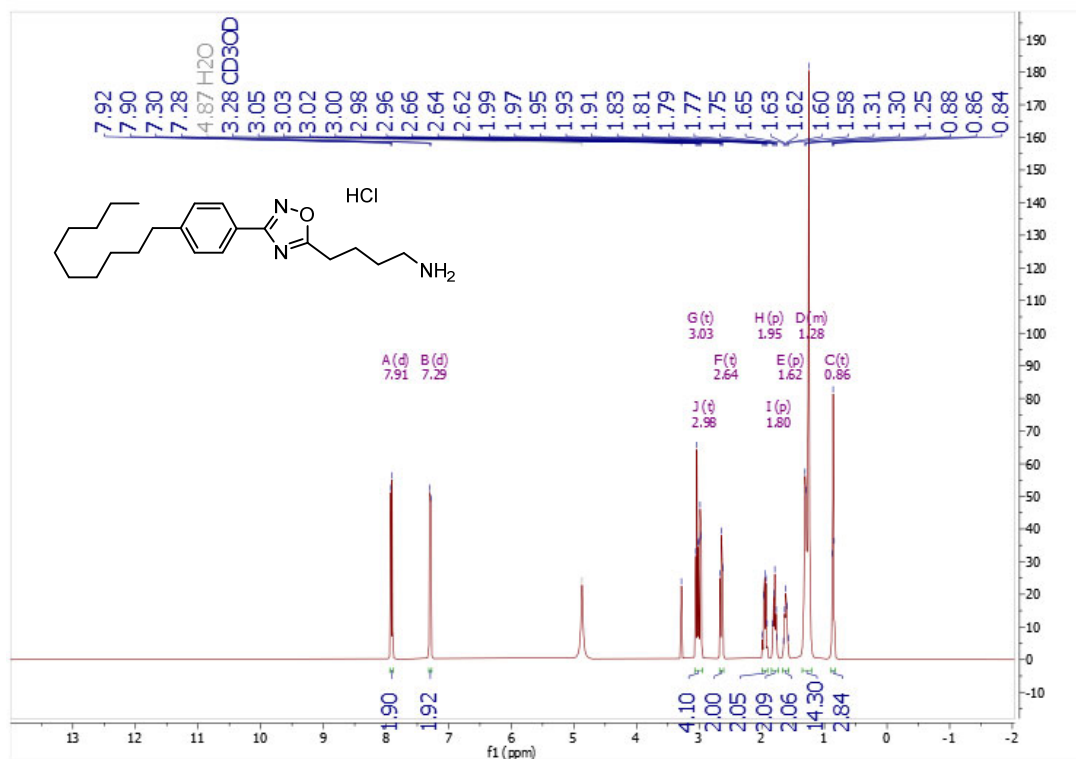

<sup>13</sup>C NMR (101 MHz, CD<sub>3</sub>OD) **16e**

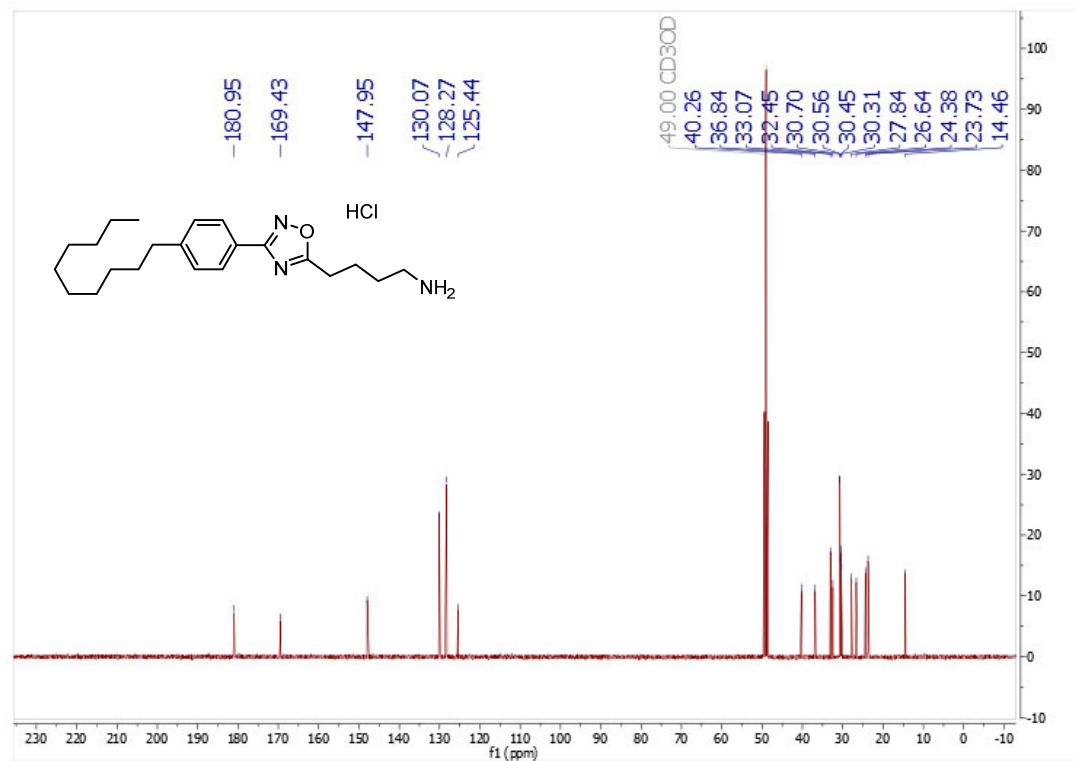

$^1\text{H}$  NMR (400 MHz,  $\text{CD}_3\text{OD}$ ) **16f**

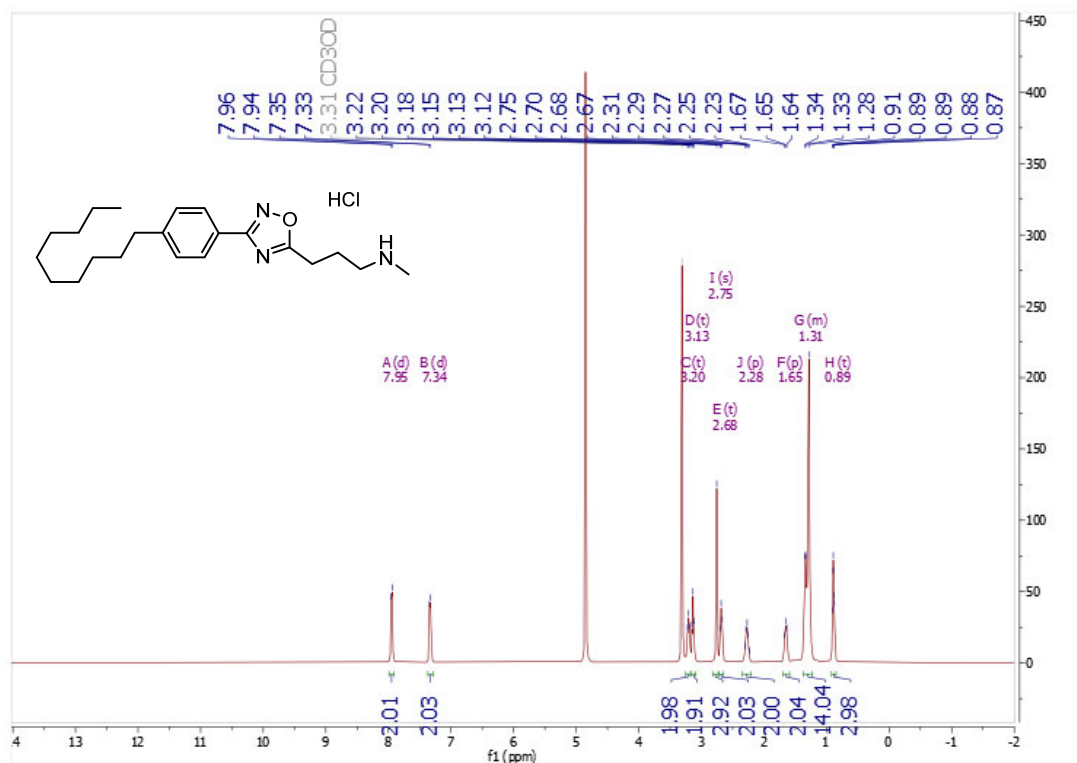

$^{13}\text{C}$  NMR (101 MHz,  $\text{CD}_3\text{OD}$ ) **16f**

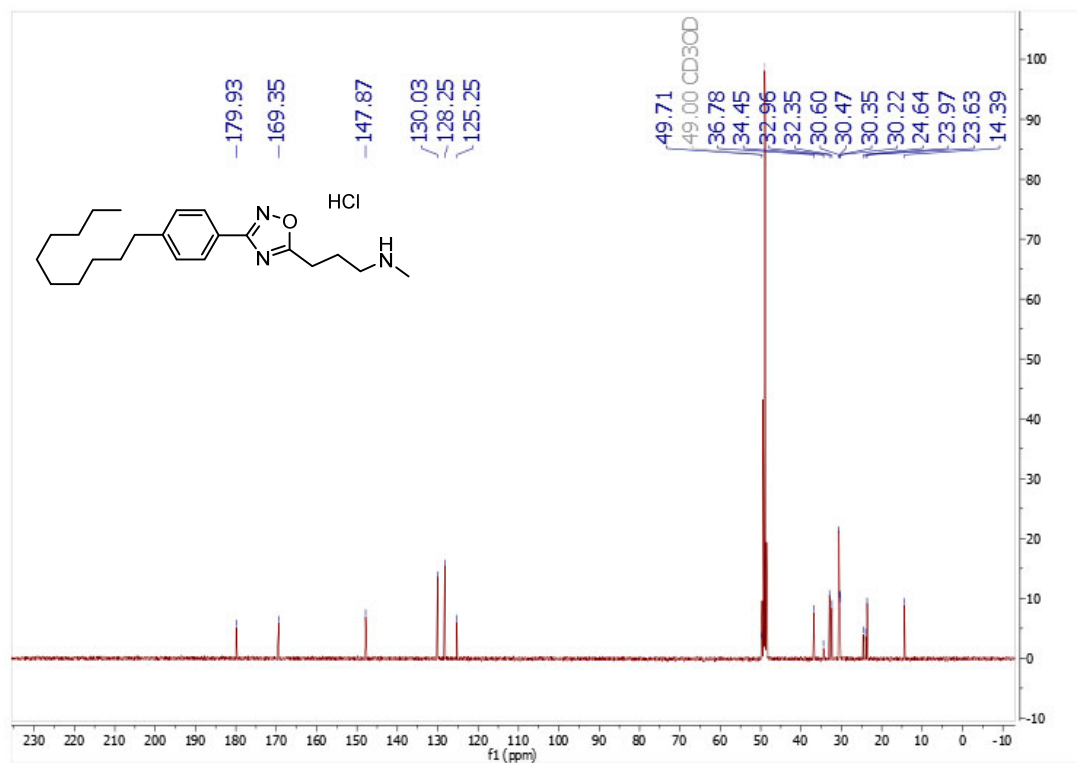



<sup>1</sup>H NMR (400 MHz, CD<sub>3</sub>OD) **16g**

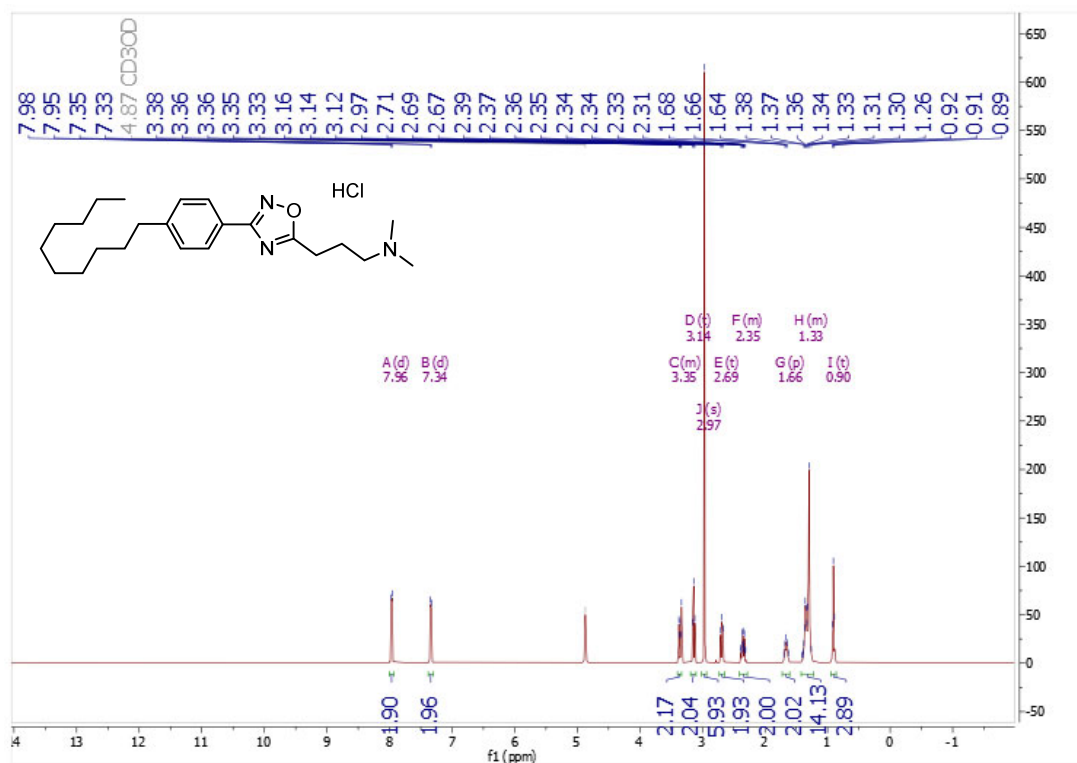

<sup>13</sup>C NMR (101 MHz, CDCl<sub>3</sub>) **16g**

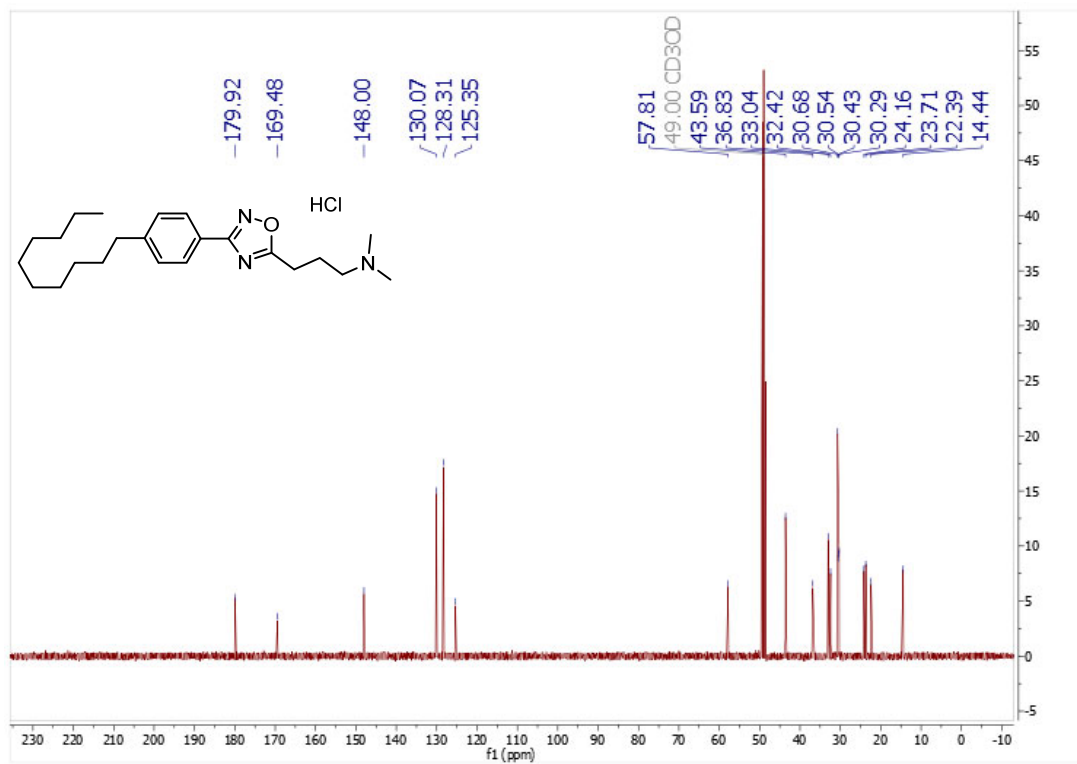

<sup>1</sup>H NMR (400 MHz, CD<sub>3</sub>OD) **16j**

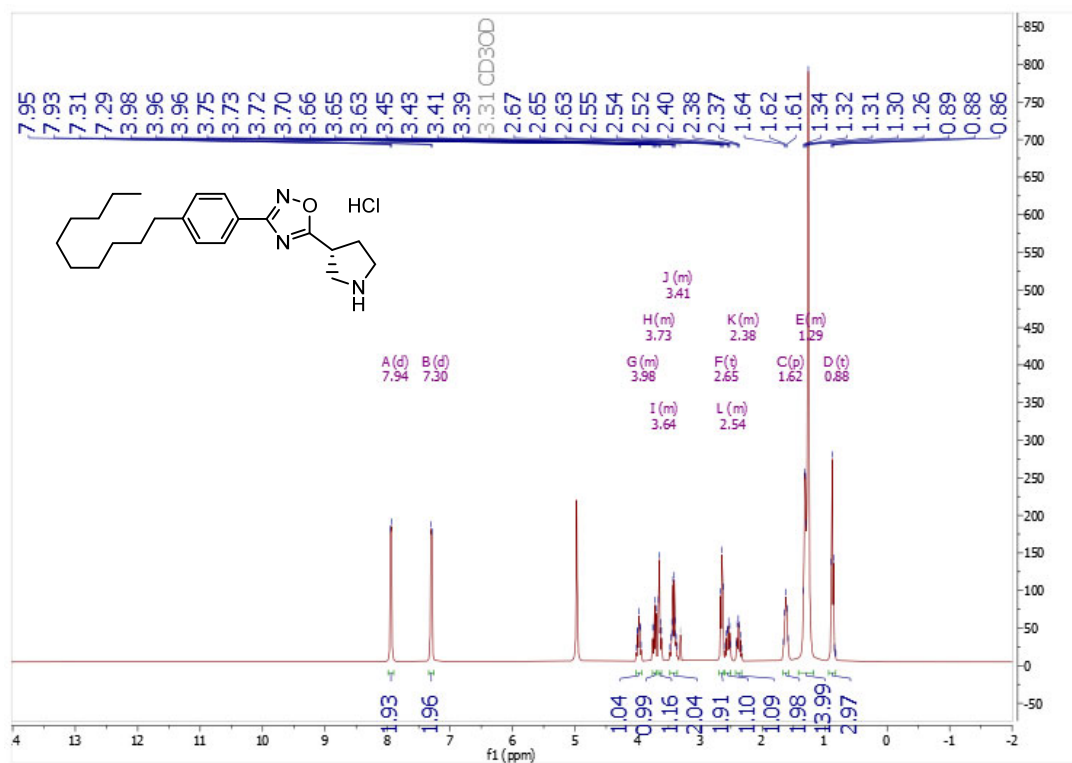

<sup>13</sup>C NMR (100 MHz, CD<sub>3</sub>OD) **16j**

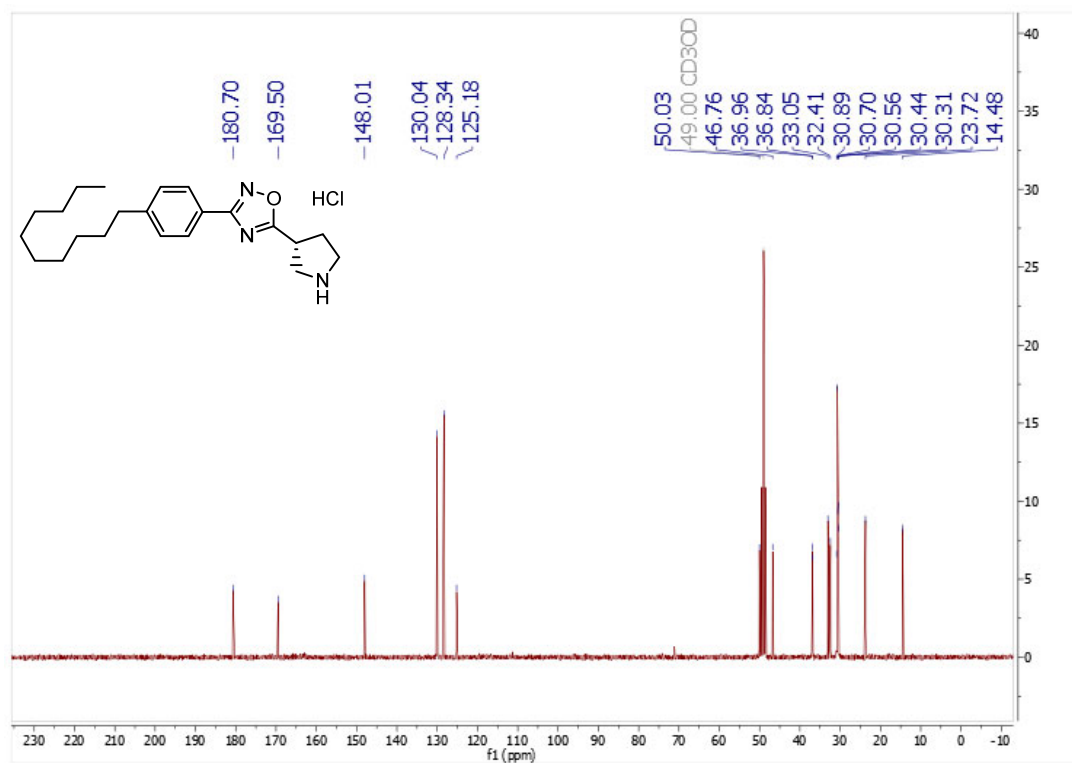

<sup>1</sup>H NMR (400 MHz, CD<sub>3</sub>OD) **16k**

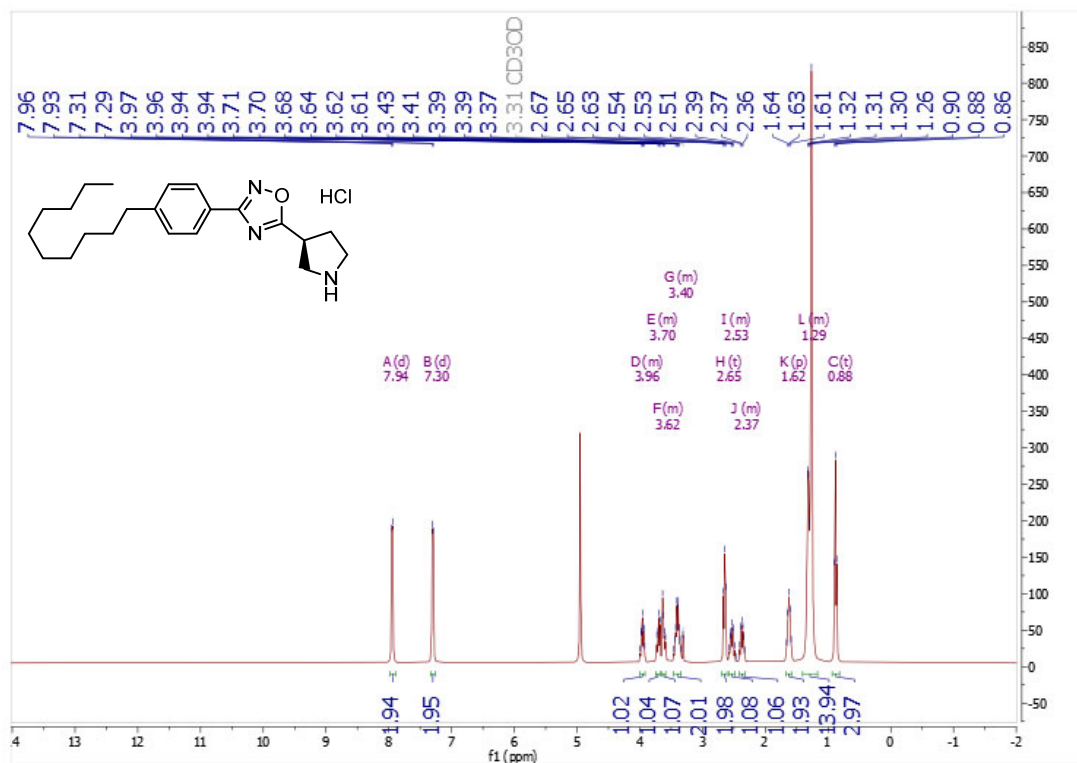

<sup>13</sup>C NMR (100 MHz, CD<sub>3</sub>OD) **16k**

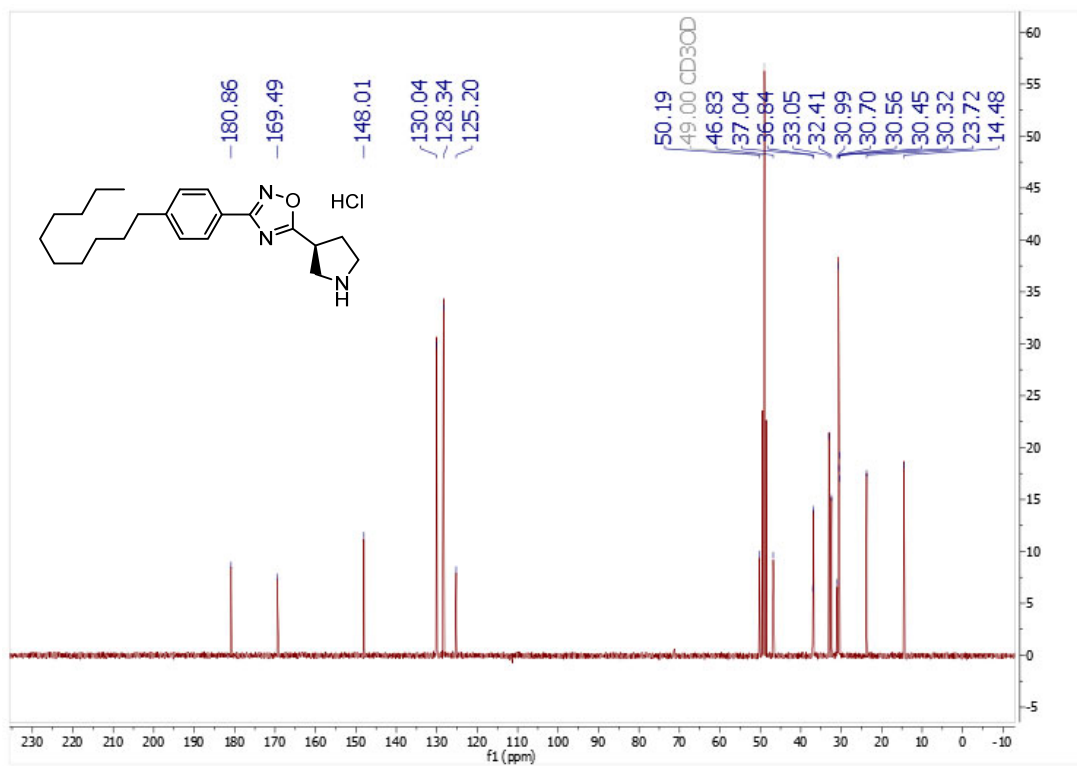

<sup>1</sup>H NMR (400 MHz, CD<sub>3</sub>OD) **16l**

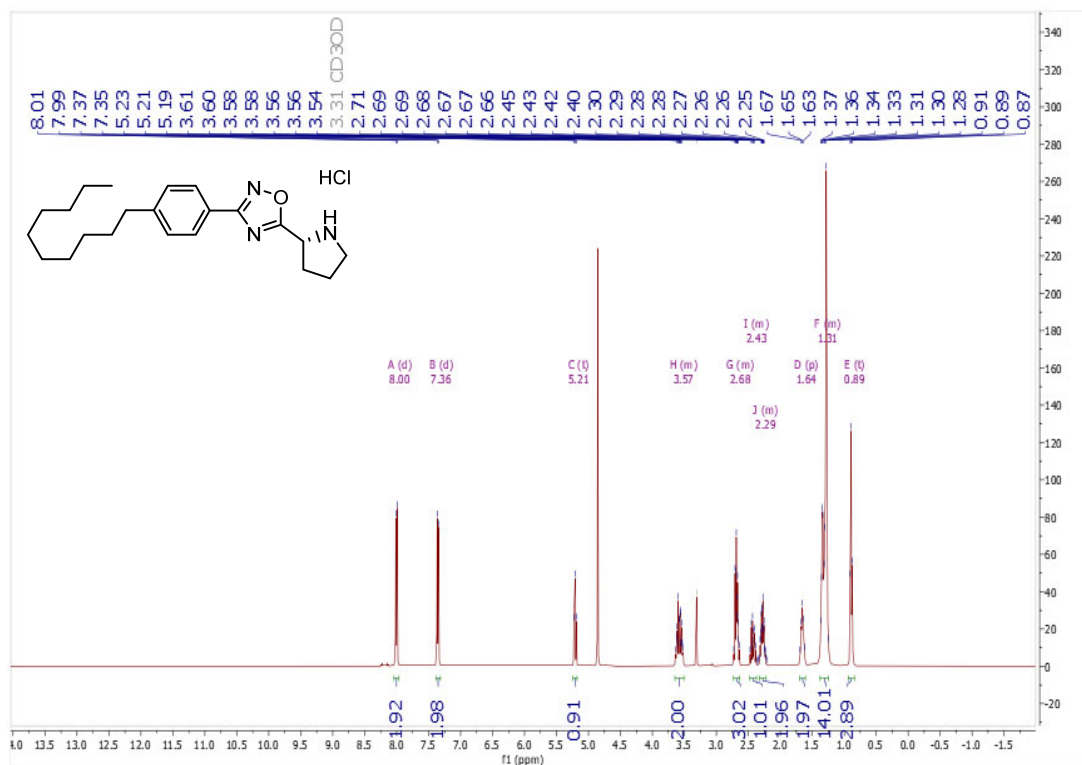

<sup>13</sup>C NMR (101 MHz, CD<sub>3</sub>OD) **16l**

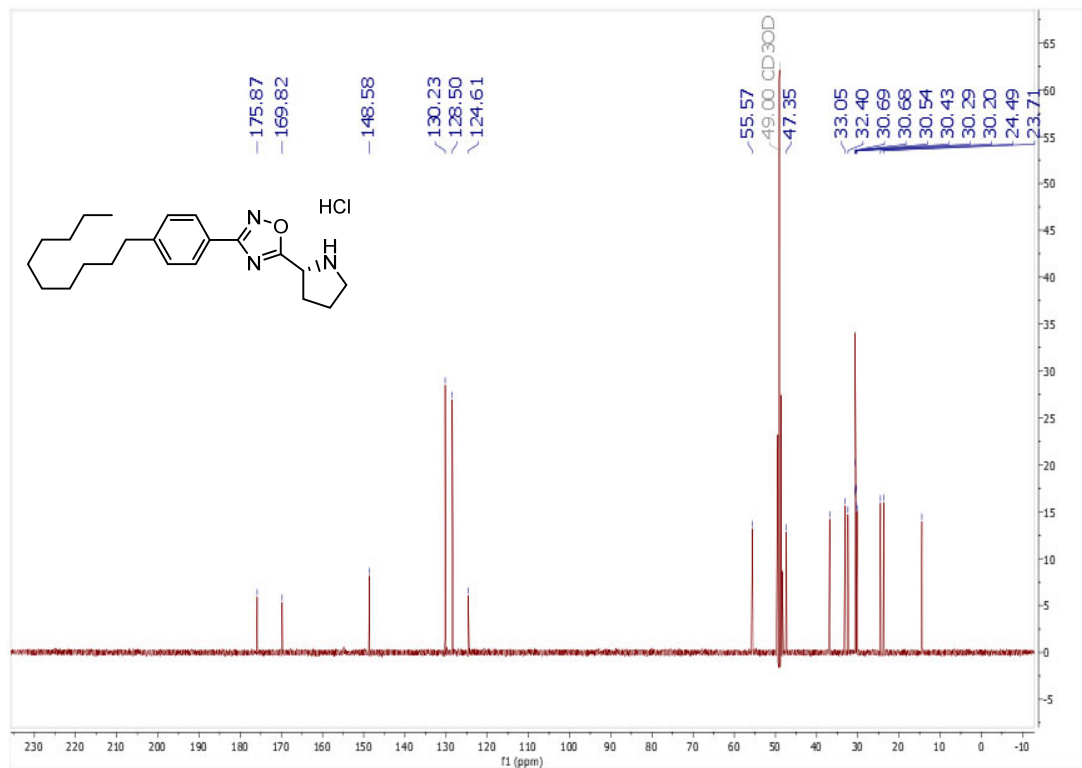

<sup>1</sup>H NMR (400 MHz, CD<sub>3</sub>OD) **16m**

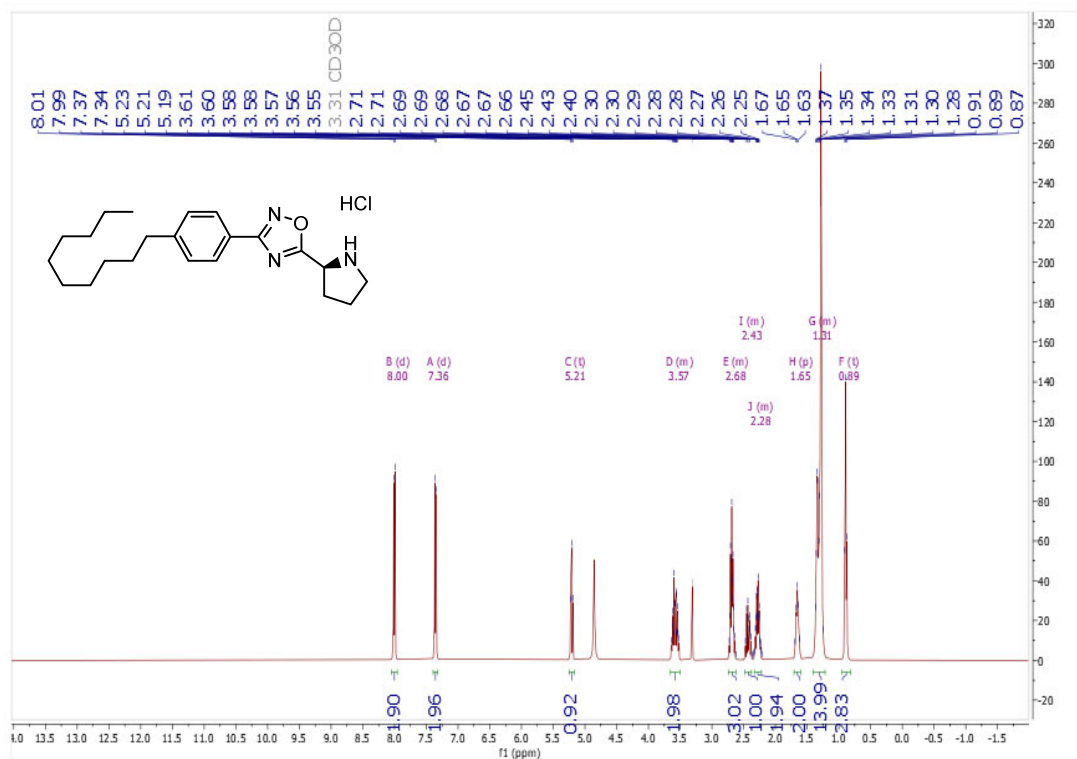

<sup>13</sup>C NMR (101 MHz, CD<sub>3</sub>OD) **16m**

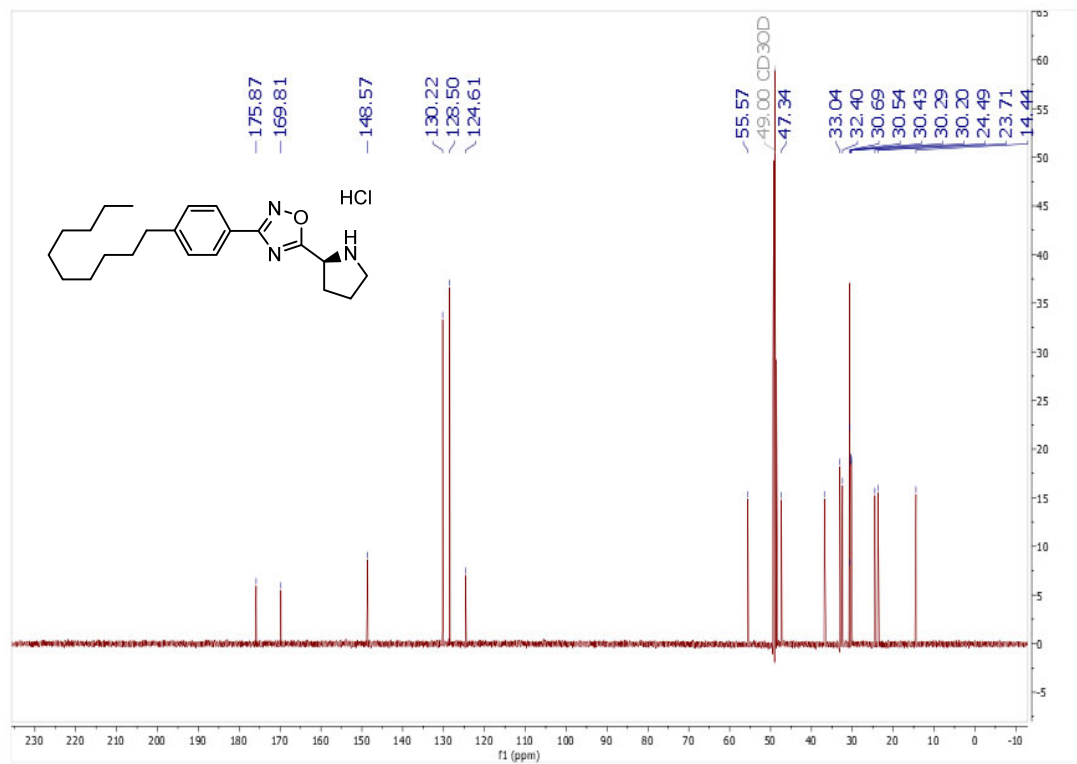

<sup>1</sup>H NMR (400 MHz, CD<sub>3</sub>OD) **16o**

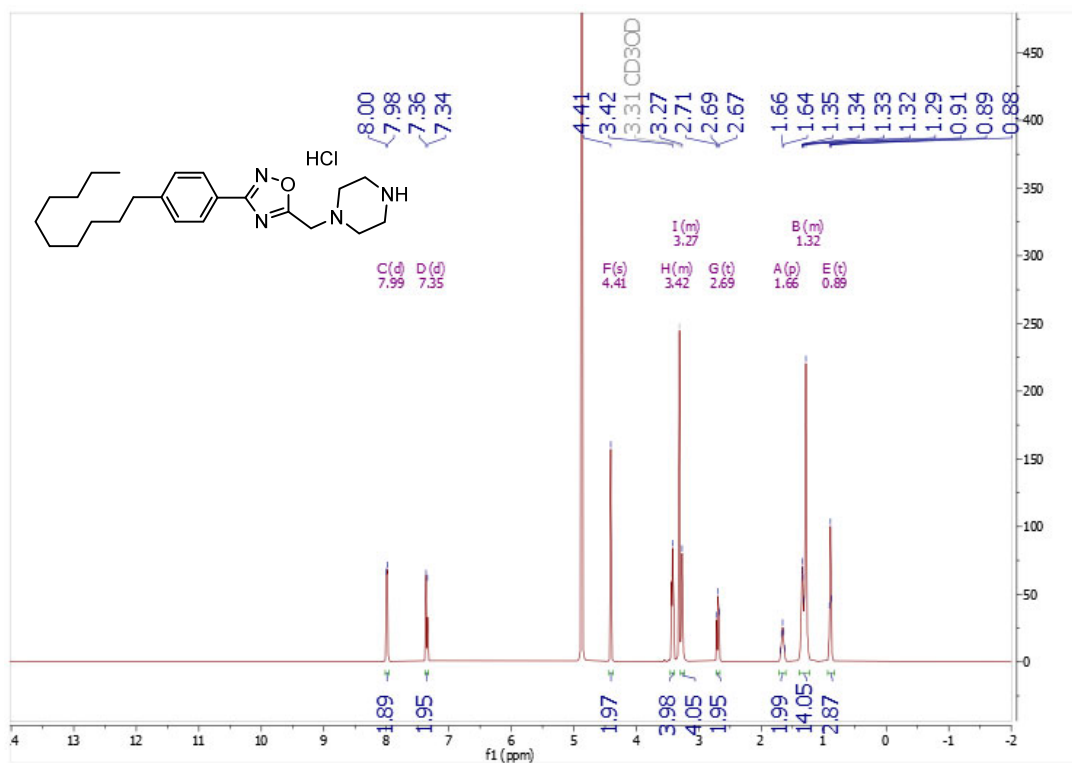

<sup>13</sup>C NMR (101 MHz, CD<sub>3</sub>OD) **16o**

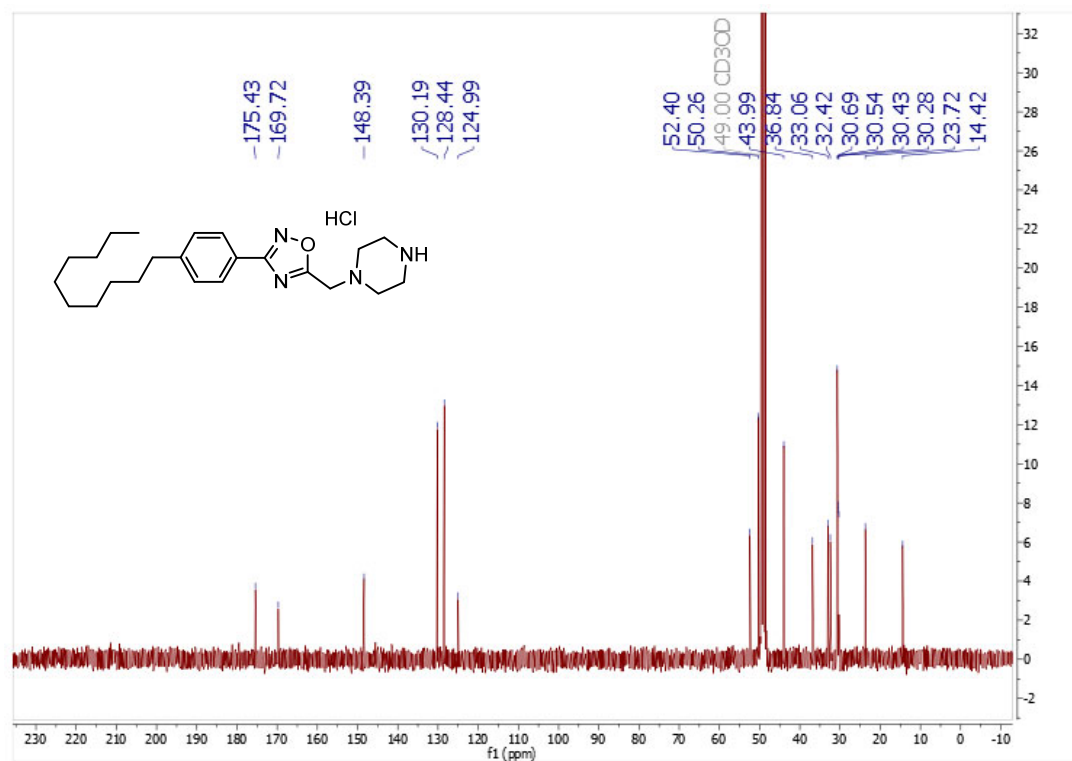

<sup>1</sup>H NMR (400 MHz, CD<sub>3</sub>OD) **16p**

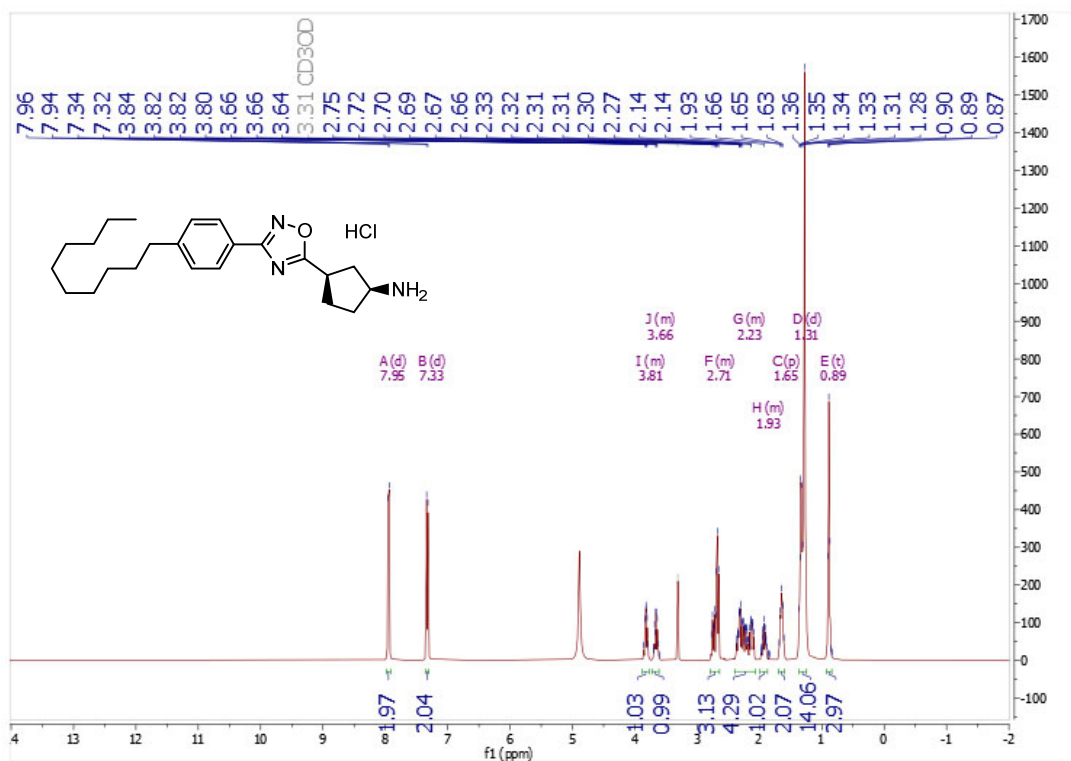

<sup>13</sup>C NMR (100 MHz, CD<sub>3</sub>OD) **16p**

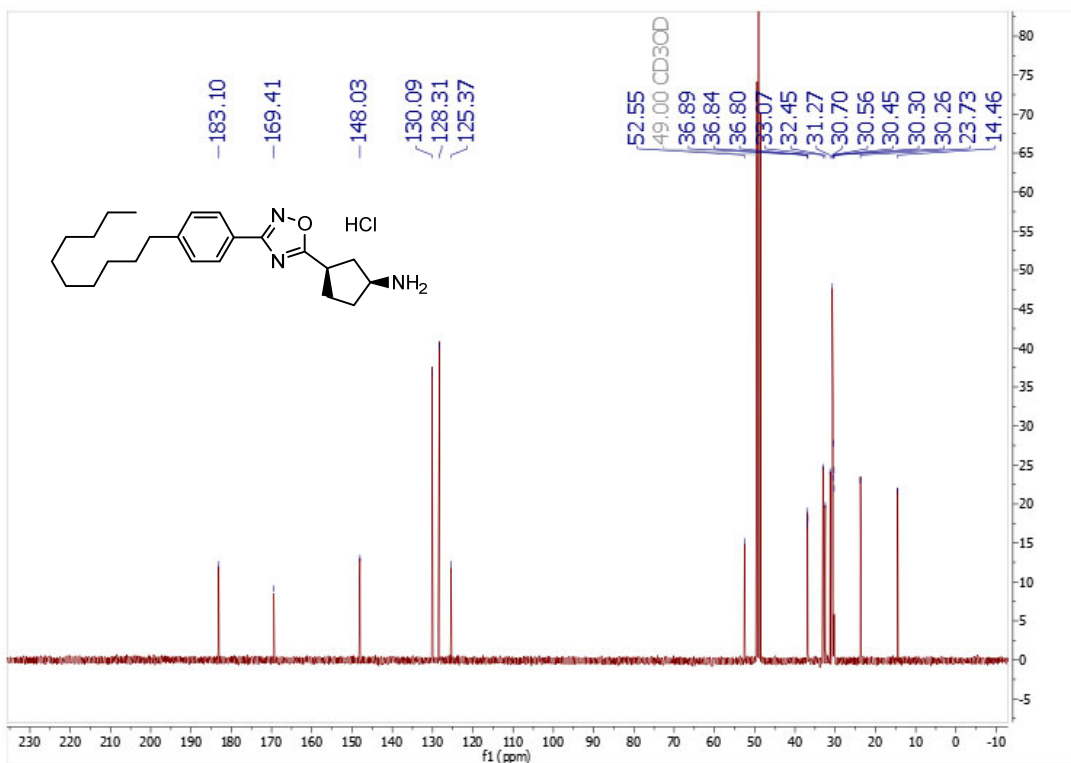

<sup>1</sup>H NMR (400 MHz, CD<sub>3</sub>OD) **16q**

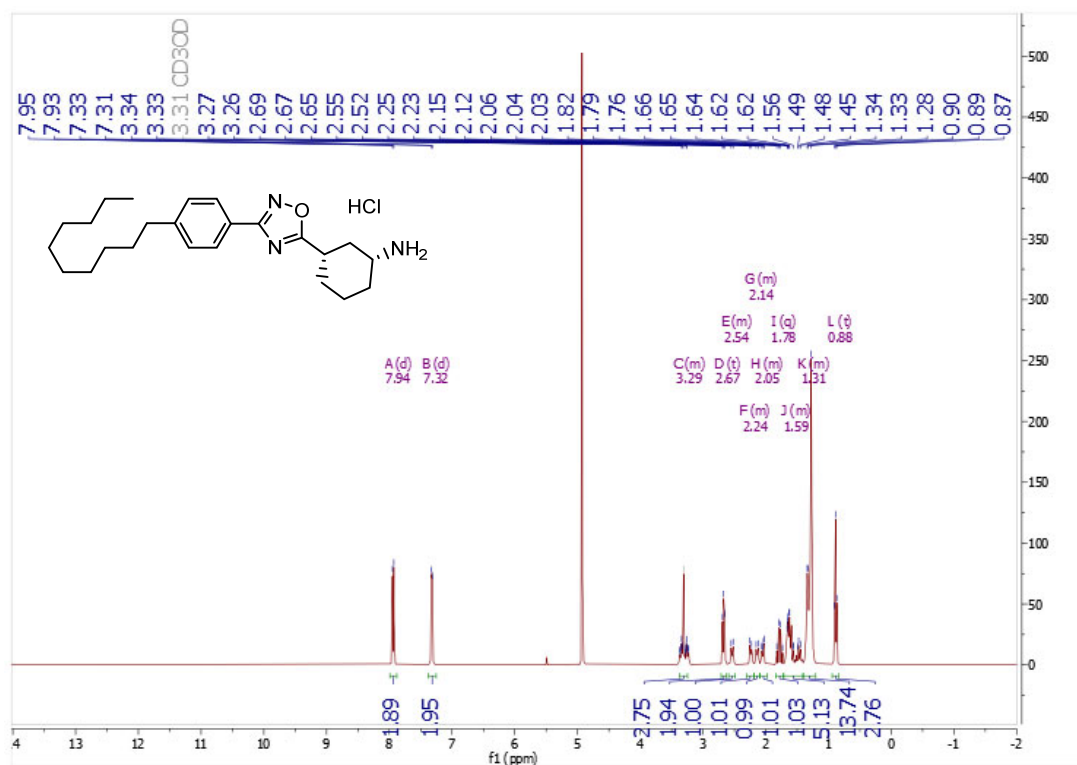

<sup>13</sup>C NMR (101 MHz, CD<sub>3</sub>OD) **16q**

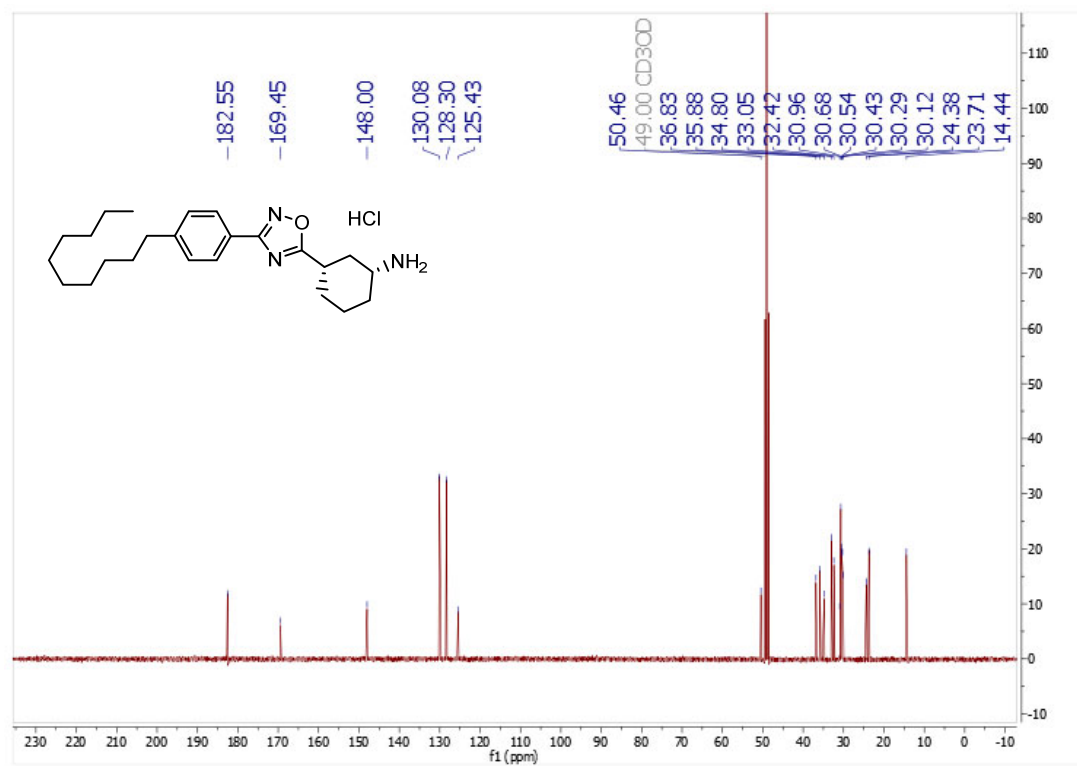



<sup>1</sup>H NMR (400 MHz, CD<sub>3</sub>OD) **16s**

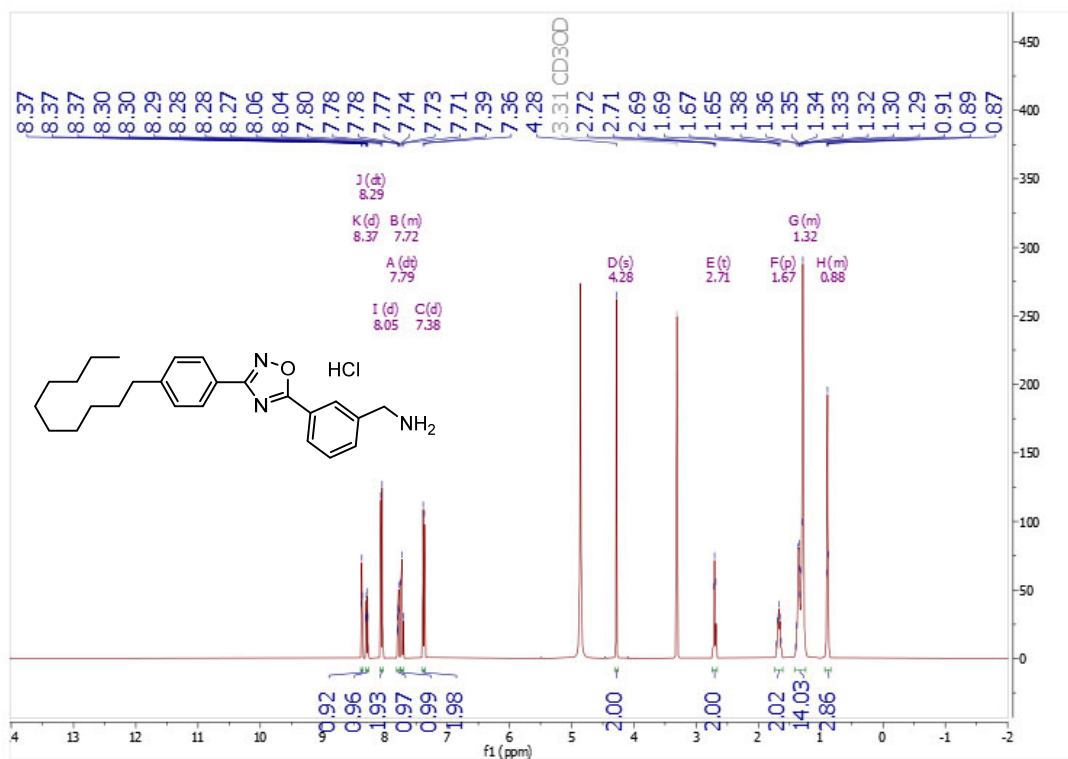

<sup>13</sup>C NMR (101 MHz, CD<sub>3</sub>OD) **16s**

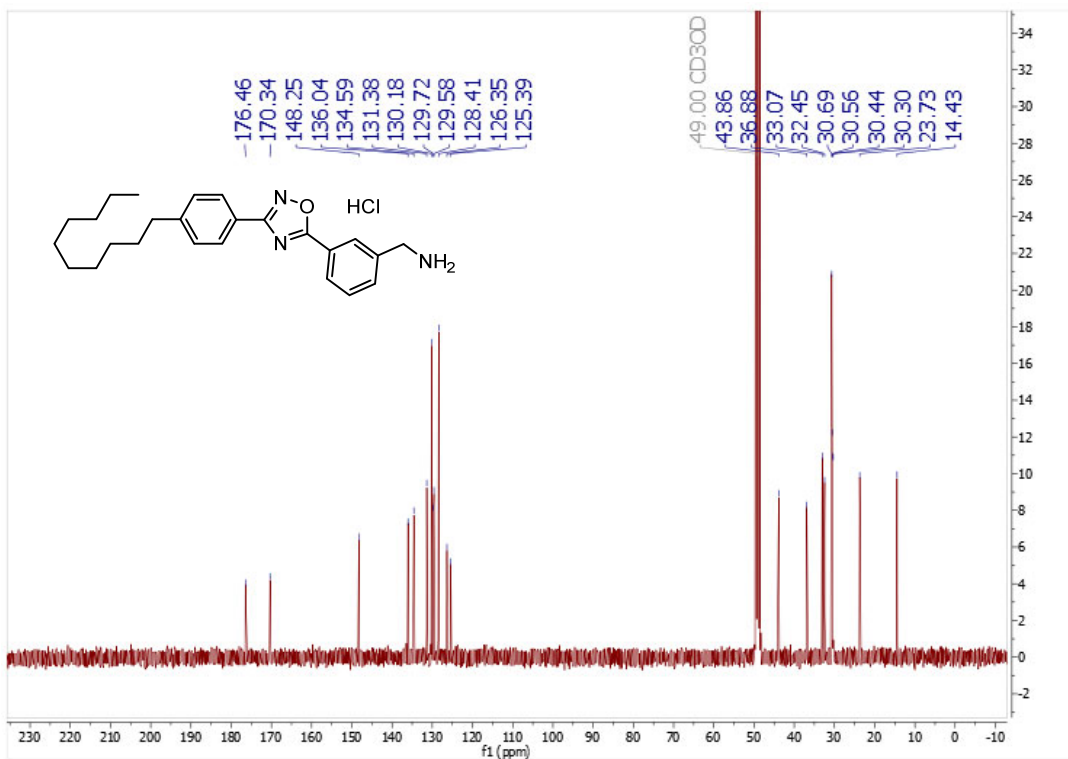

<sup>1</sup>H NMR (400 MHz, CD<sub>3</sub>OD) **16u**

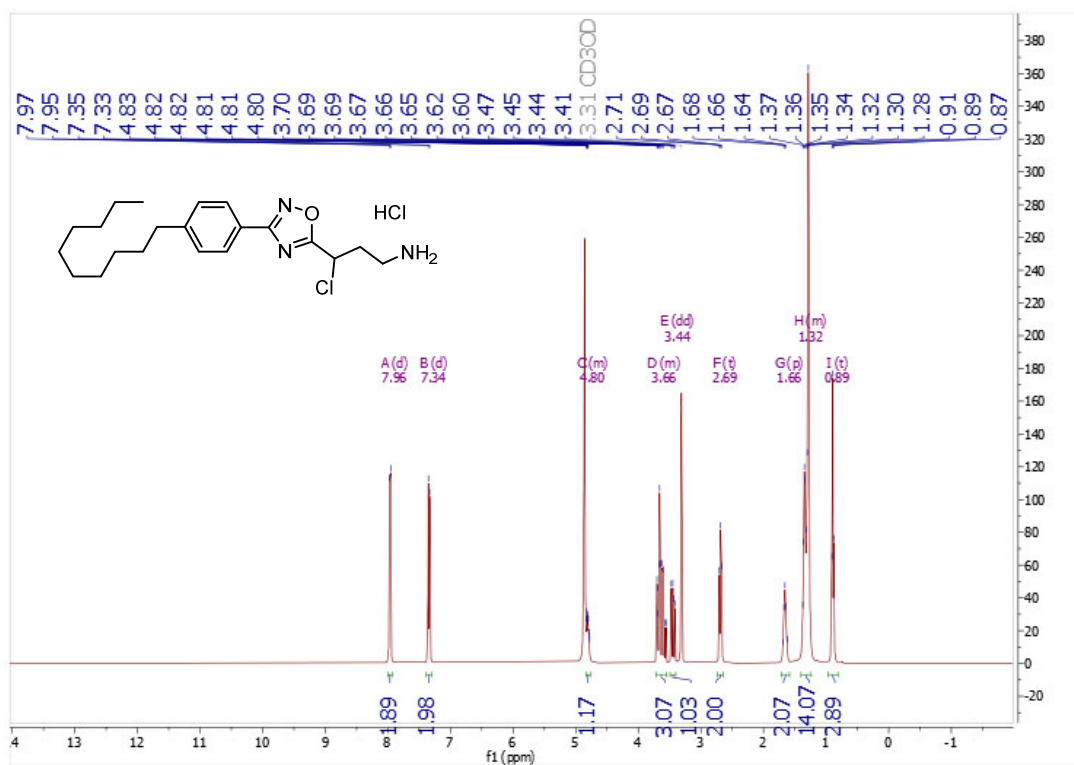

<sup>13</sup>C NMR (101 MHz, CD<sub>3</sub>OD) **16u**

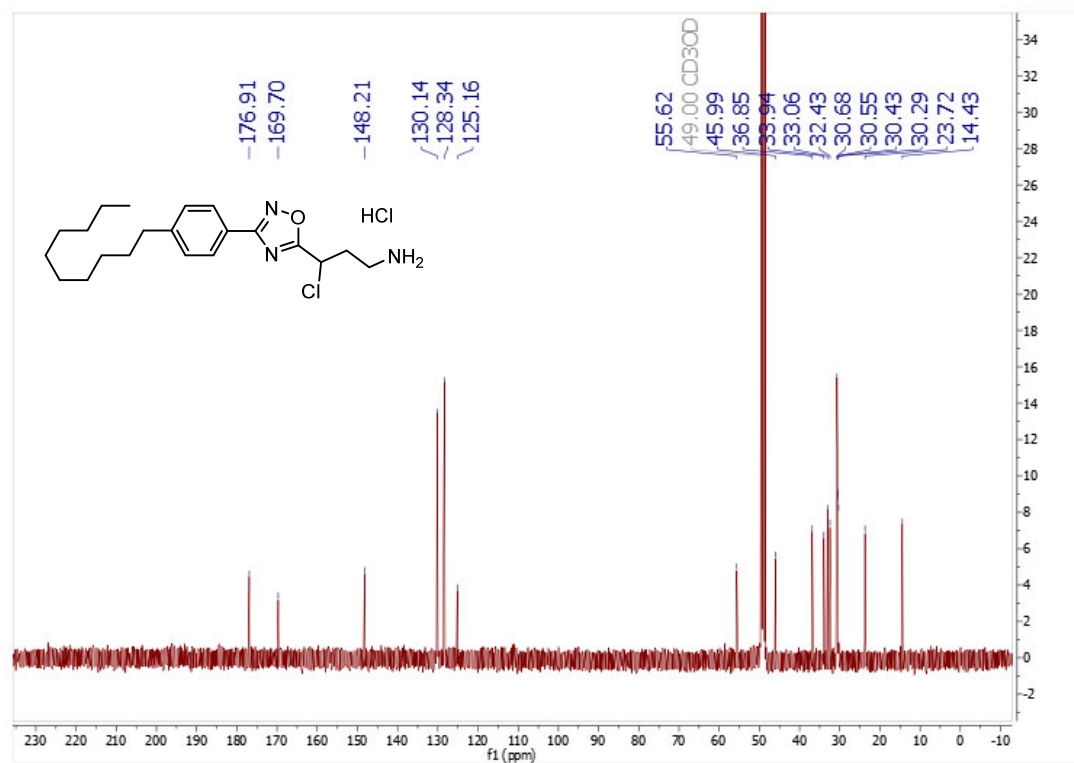

<sup>1</sup>H NMR (400 MHz, CD<sub>3</sub>OD) **16w**

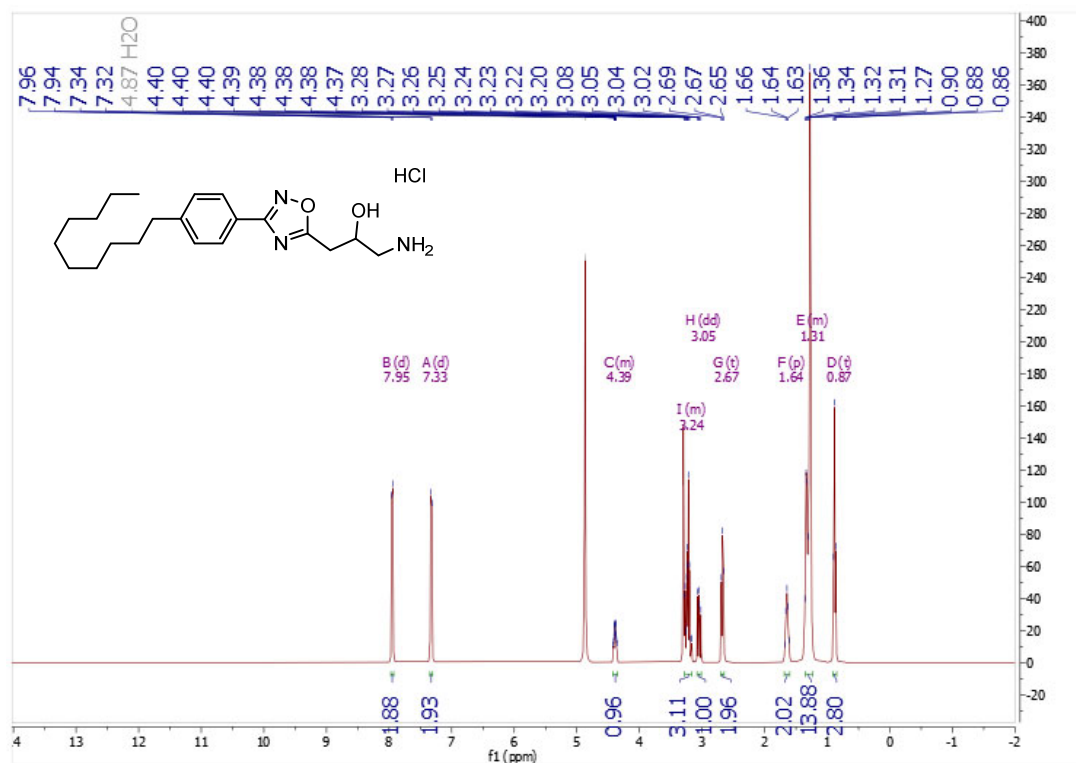

<sup>13</sup>C NMR (100 MHz, CD<sub>3</sub>OD) **16w**

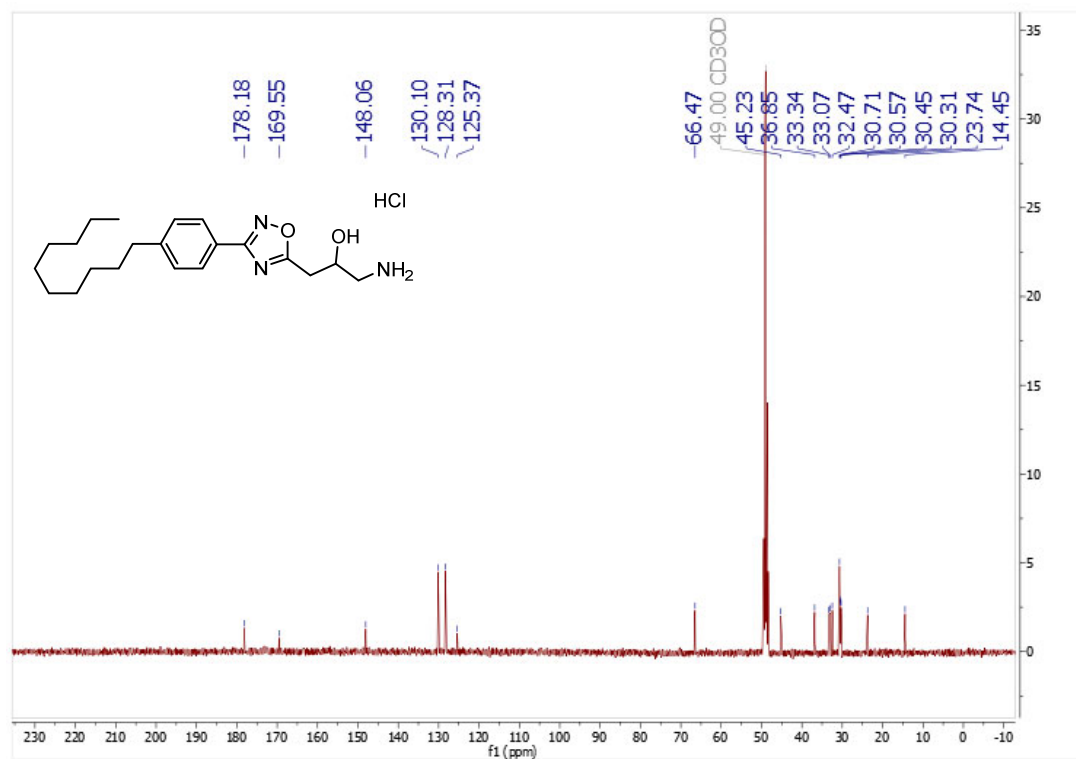

<sup>1</sup>H NMR (400 MHz, CD<sub>3</sub>OD) **16x**

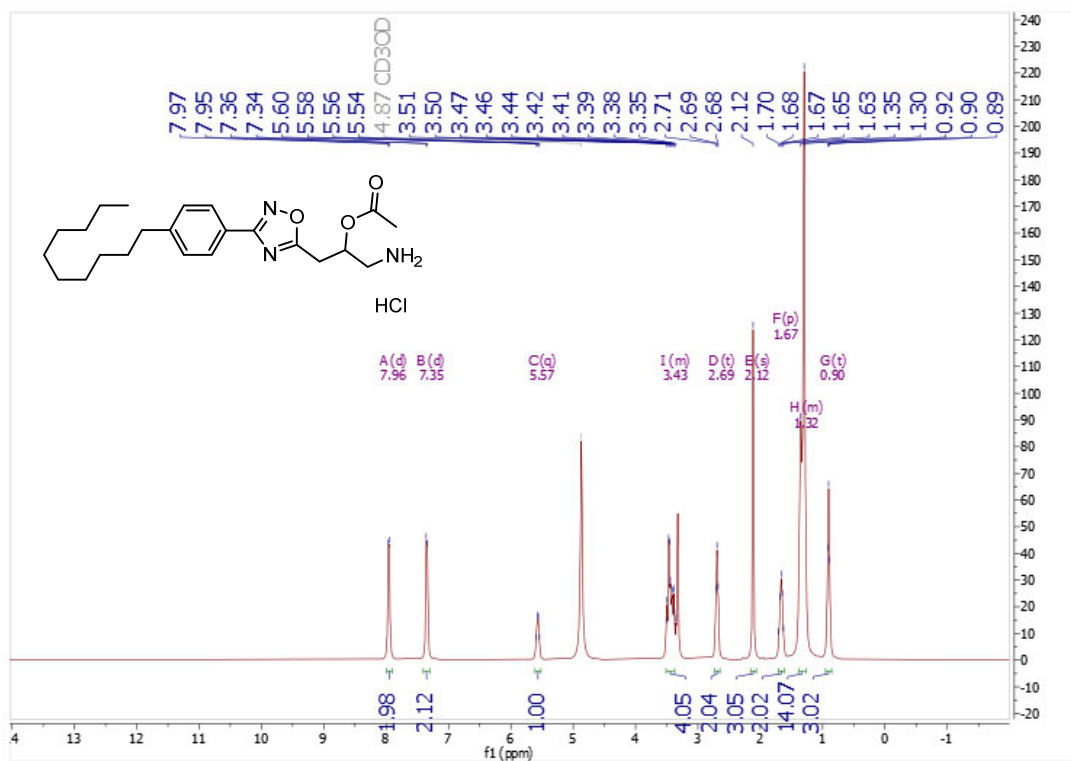

<sup>13</sup>C NMR (100 MHz, CD<sub>3</sub>OD) **16x**

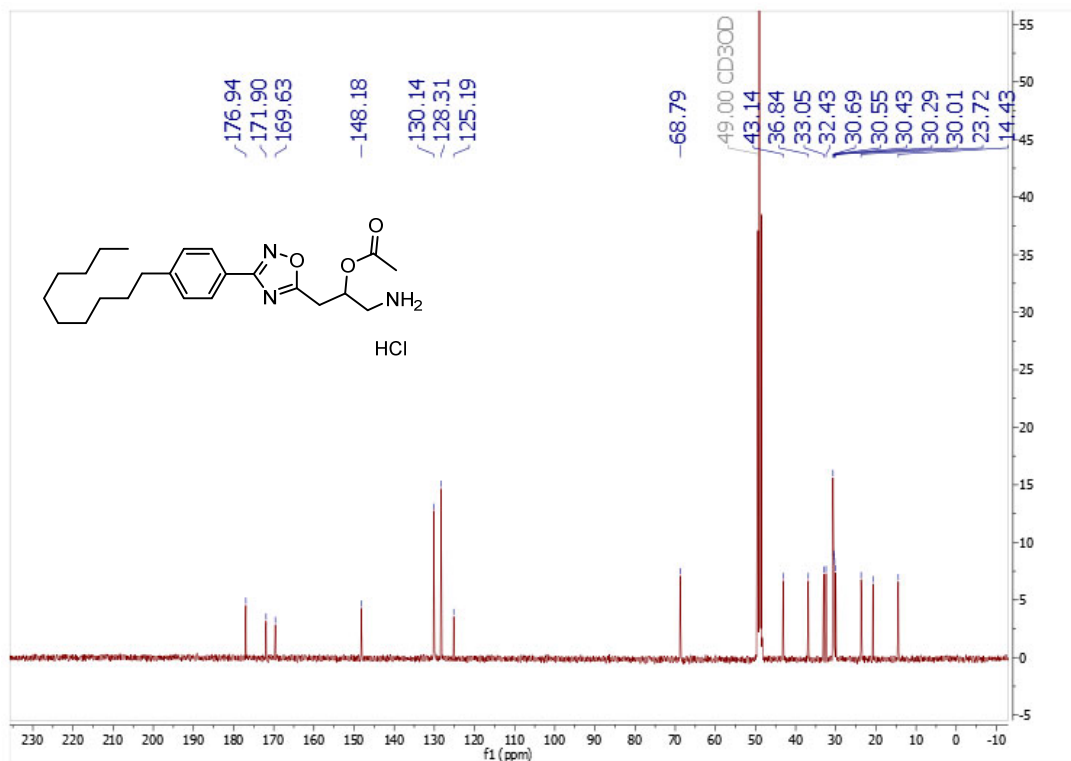

<sup>1</sup>H NMR (400 MHz, CD<sub>3</sub>OD) **22a**

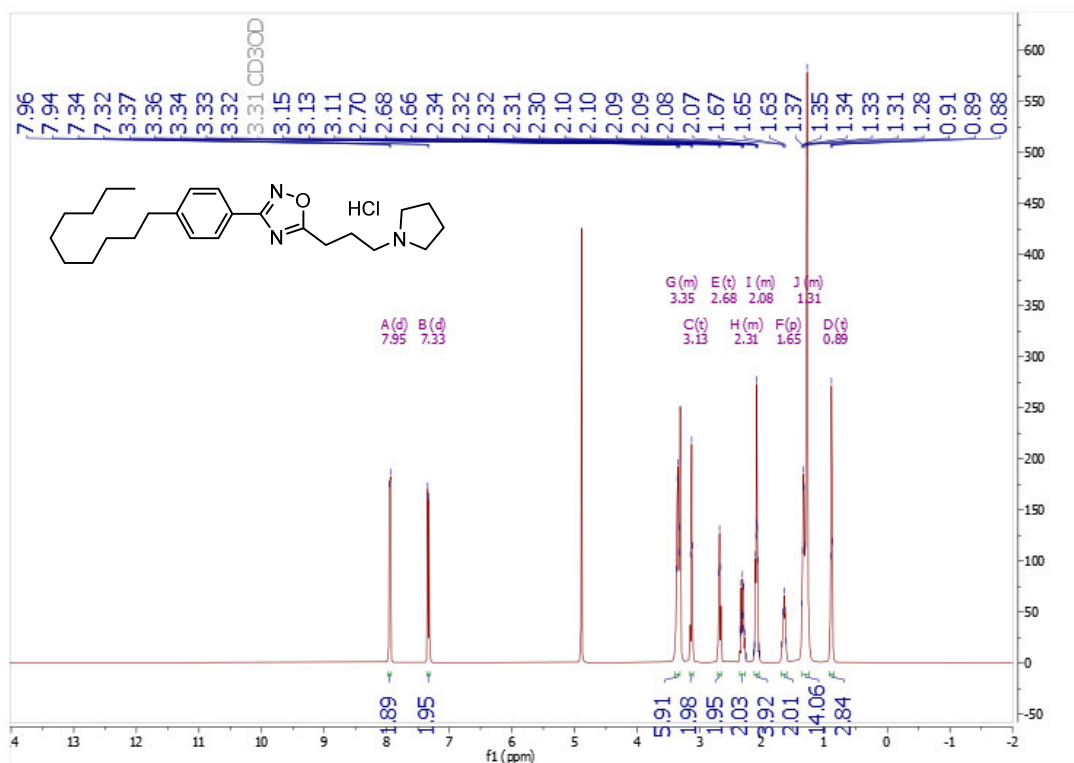

<sup>13</sup>C NMR (101 MHz, CD<sub>3</sub>OD) **22a**

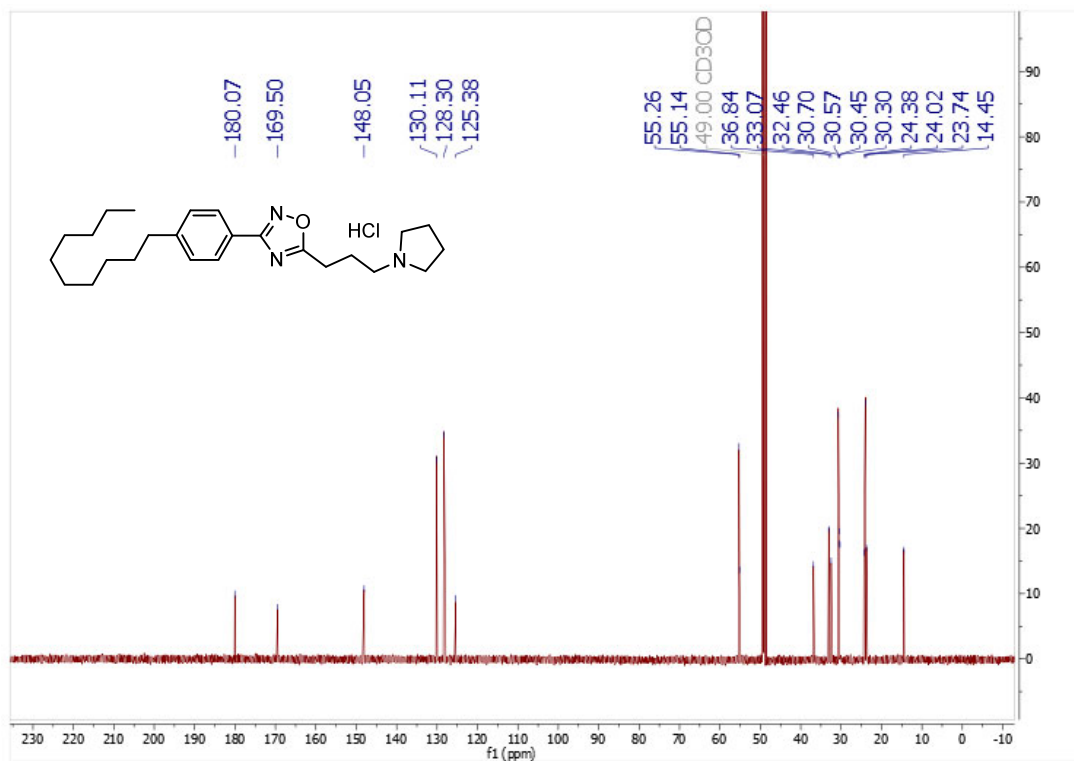

<sup>1</sup>H NMR (400 MHz, CD<sub>3</sub>OD) **22b**

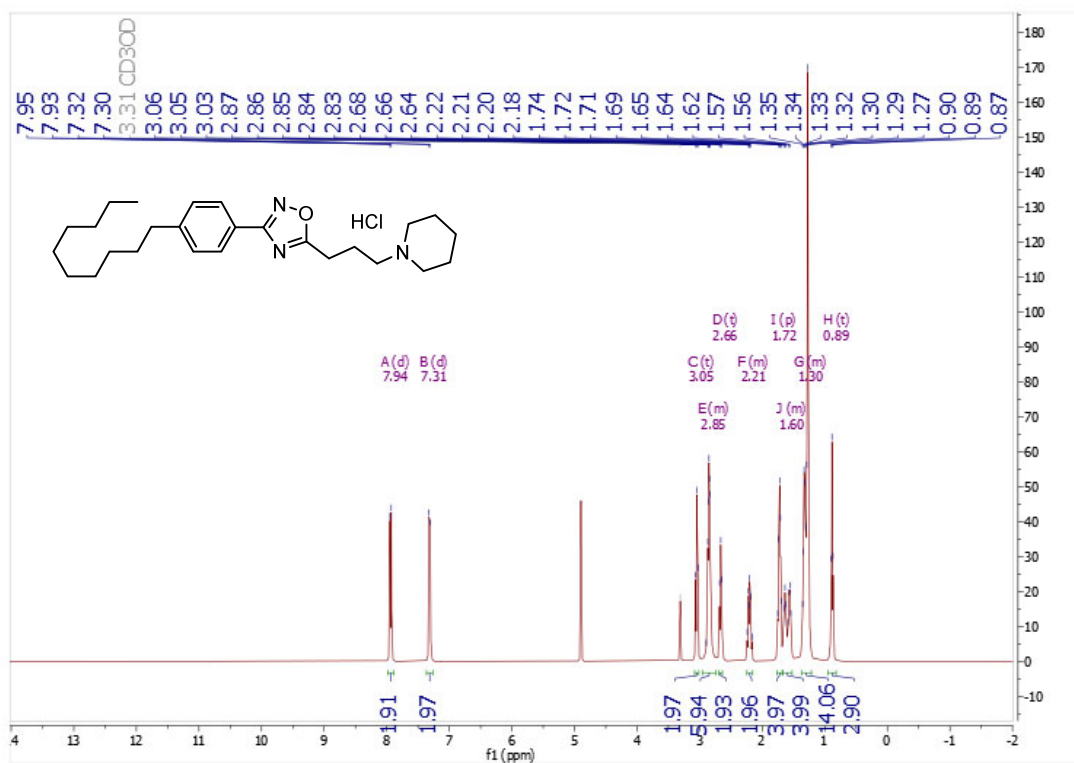

<sup>13</sup>C NMR (101 MHz, CD<sub>3</sub>OD) **22b**

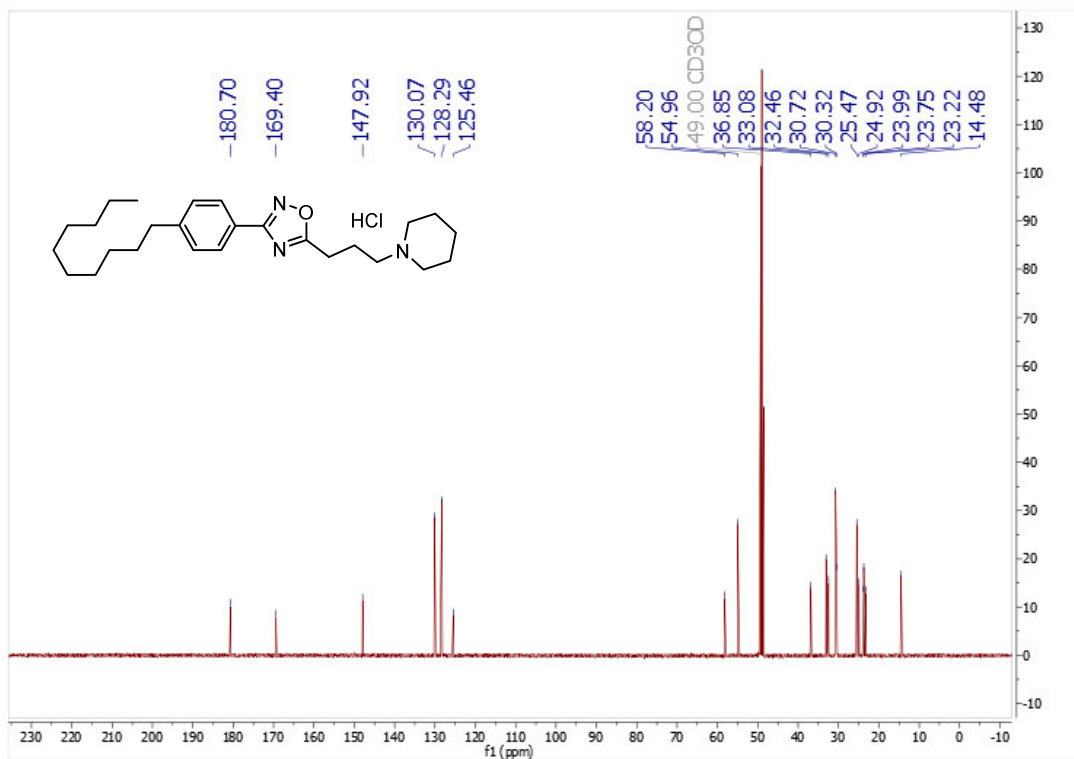

$^1\text{H}$  NMR (400 MHz,  $\text{CD}_3\text{OD}$ ) **22c**

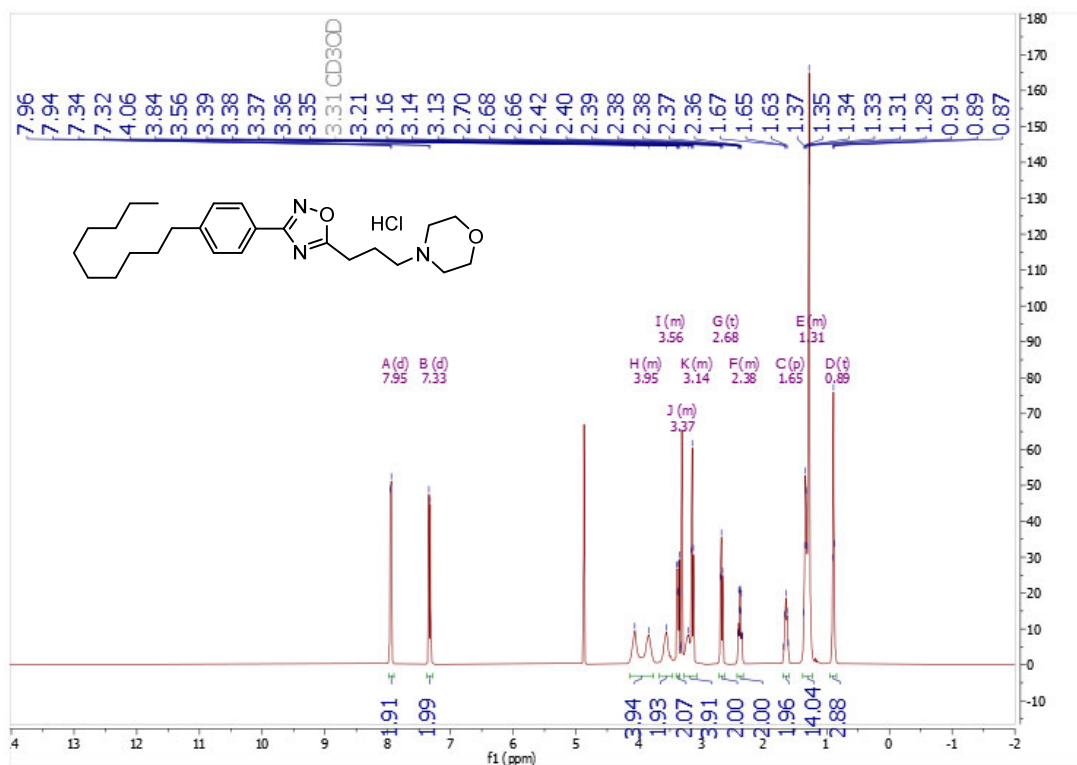

$^{13}\text{C}$  NMR (101 MHz,  $\text{CD}_3\text{OD}$ ) **22c**

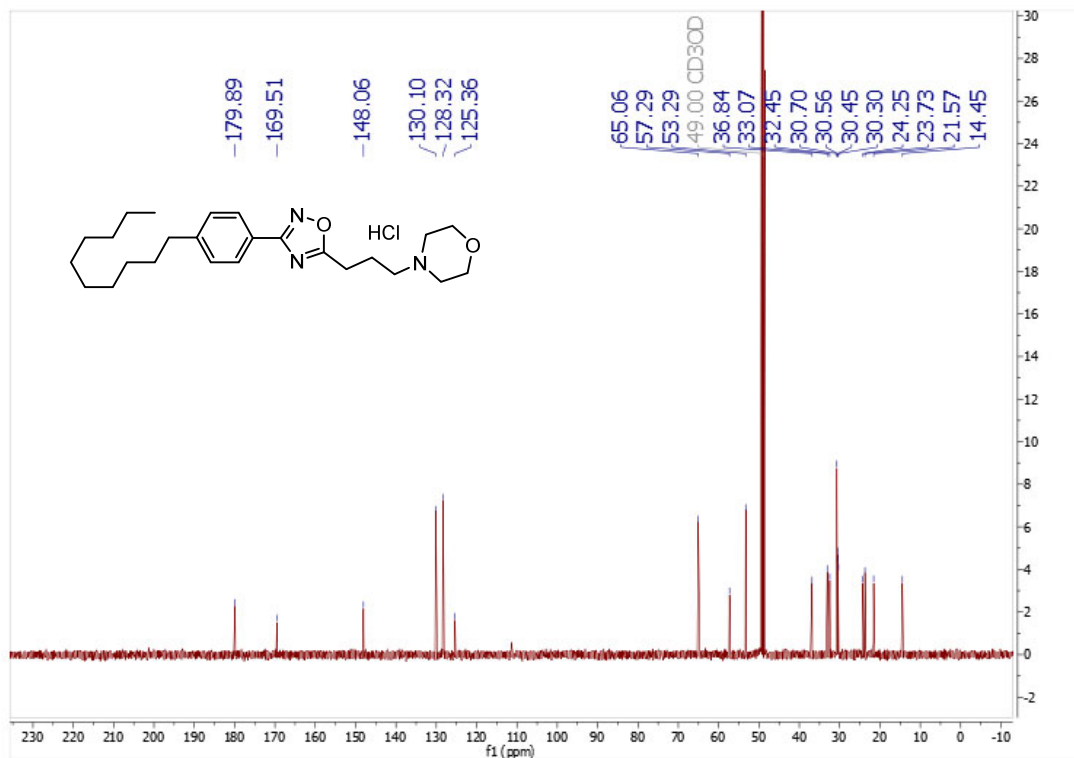

<sup>1</sup>H NMR (400 MHz, CD<sub>3</sub>OD) **22d**

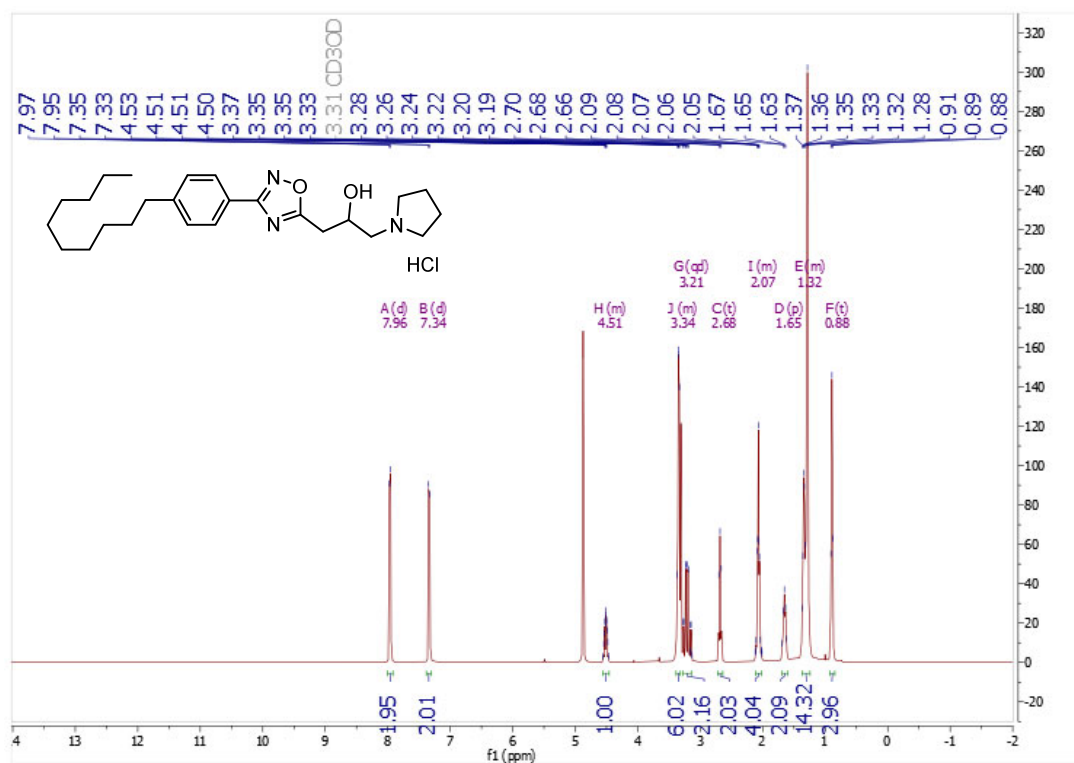

<sup>13</sup>C NMR (101 MHz, CD<sub>3</sub>OD) **22d**

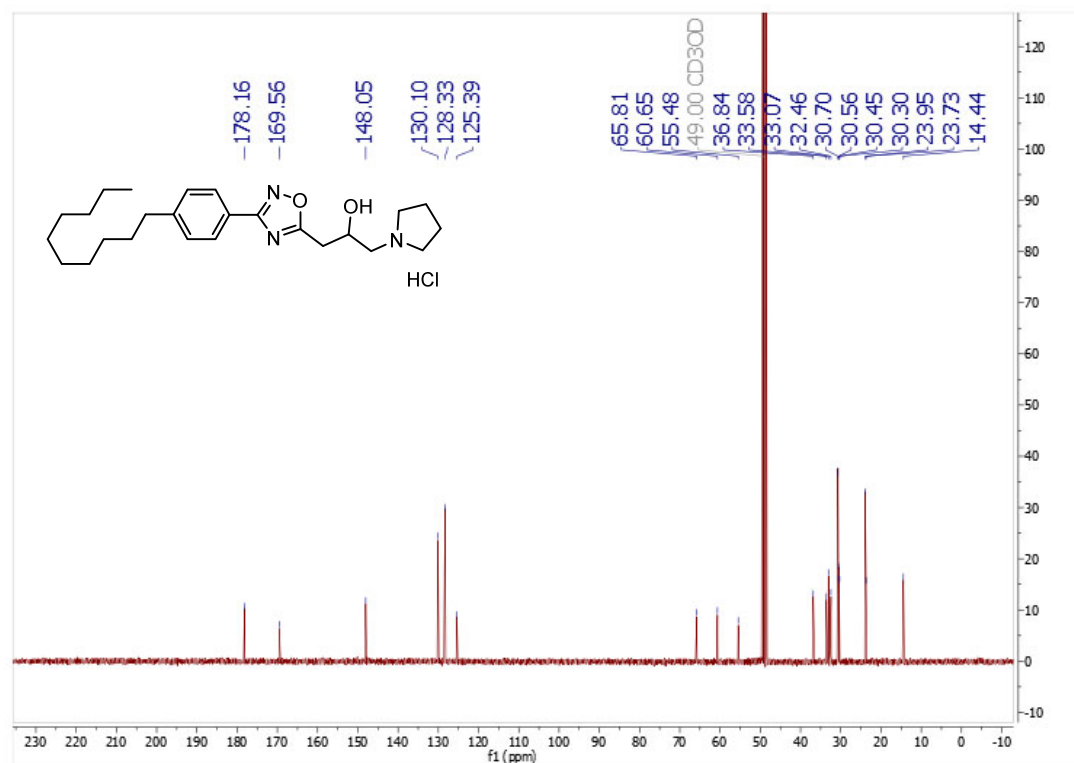



$^1\text{H}$  NMR (400 MHz,  $\text{CD}_3\text{OD}$ ) **22e**

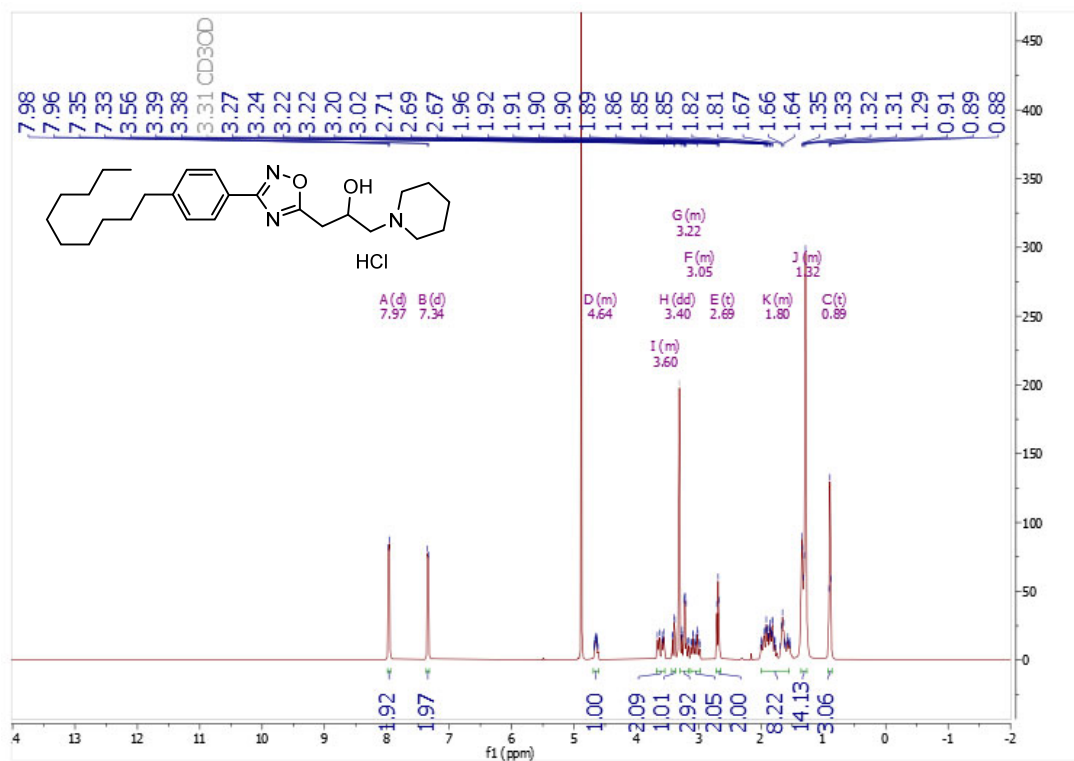

$^{13}\text{C}$  NMR (101 MHz,  $\text{CD}_3\text{OD}$ ) **22e**

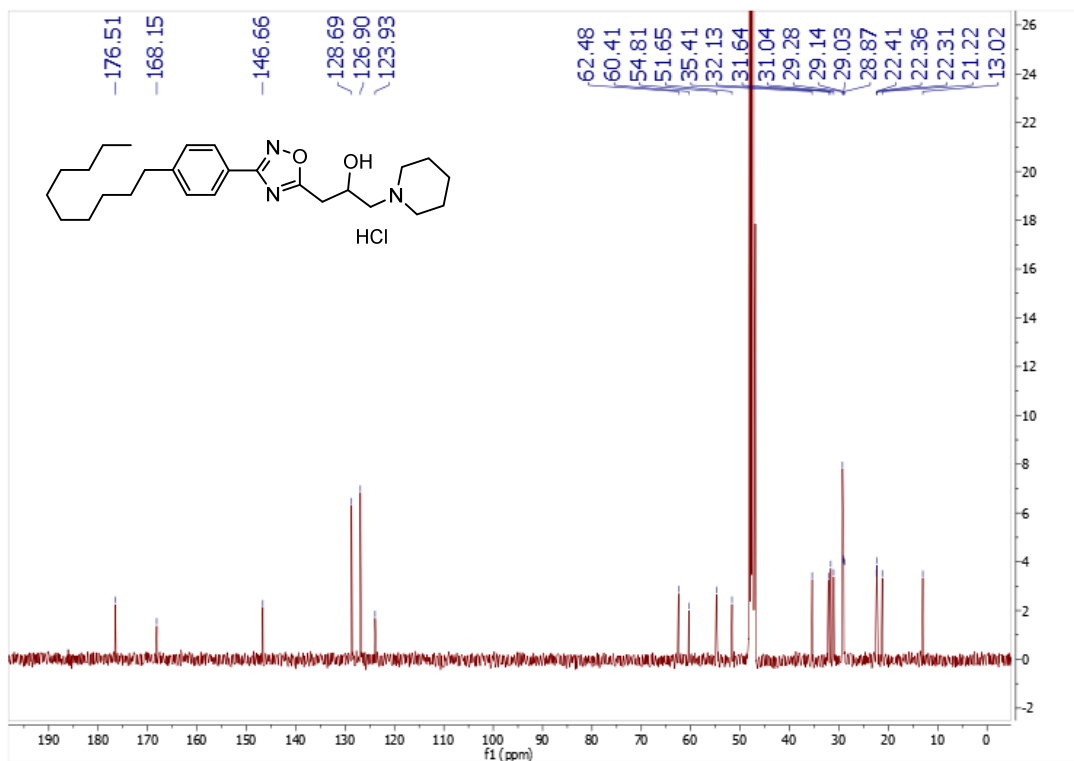

<sup>1</sup>H NMR (400 MHz, CD<sub>3</sub>OD) **22f**

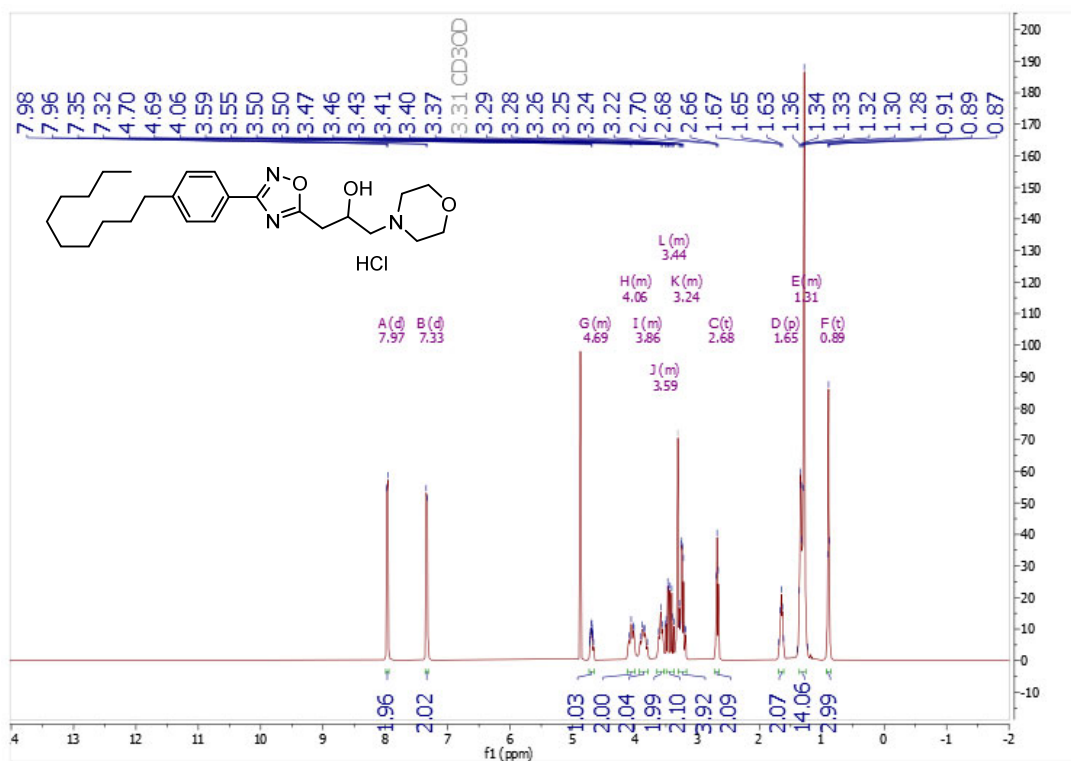

<sup>13</sup>C NMR (101 MHz, CD<sub>3</sub>OD) **22f**

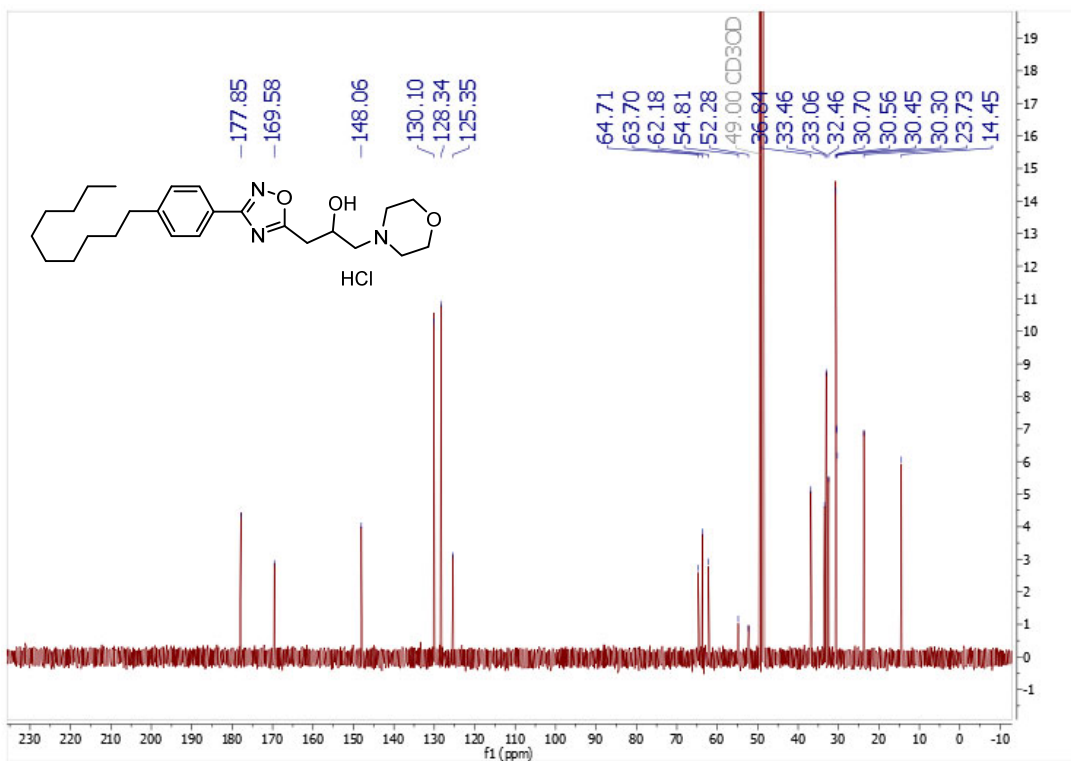

<sup>1</sup>H NMR (400 MHz, CD<sub>3</sub>OD) **23a**

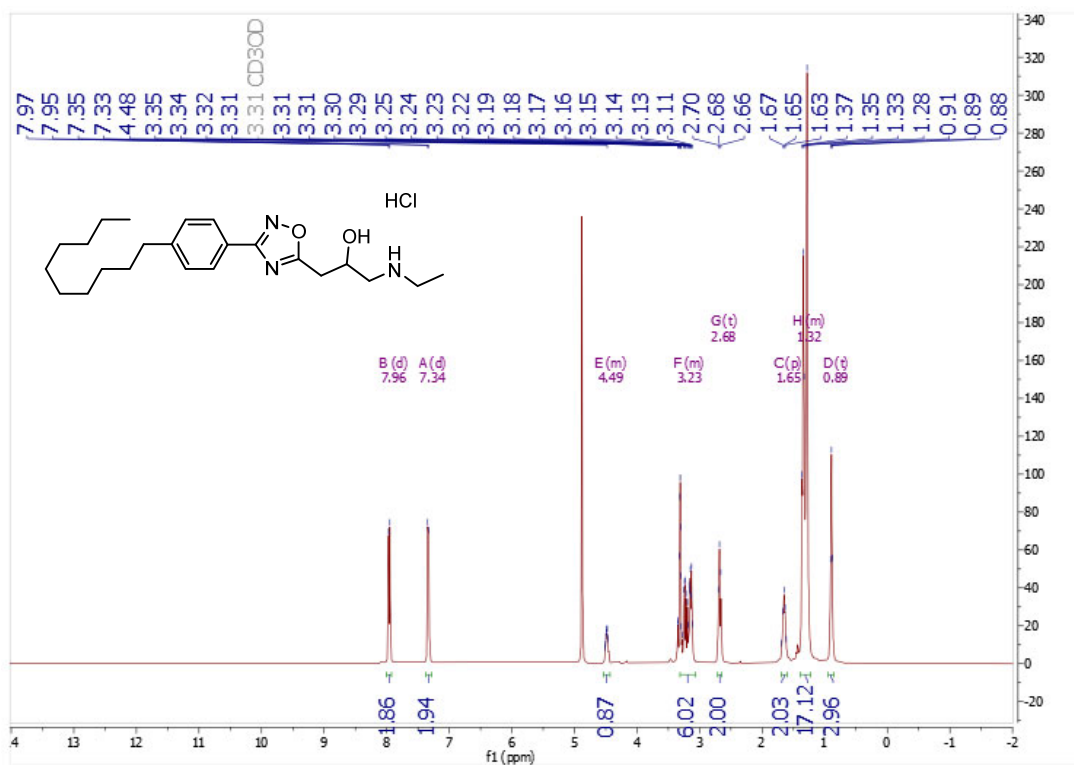

<sup>13</sup>C NMR (101 MHz, CD<sub>3</sub>OD) **23a**

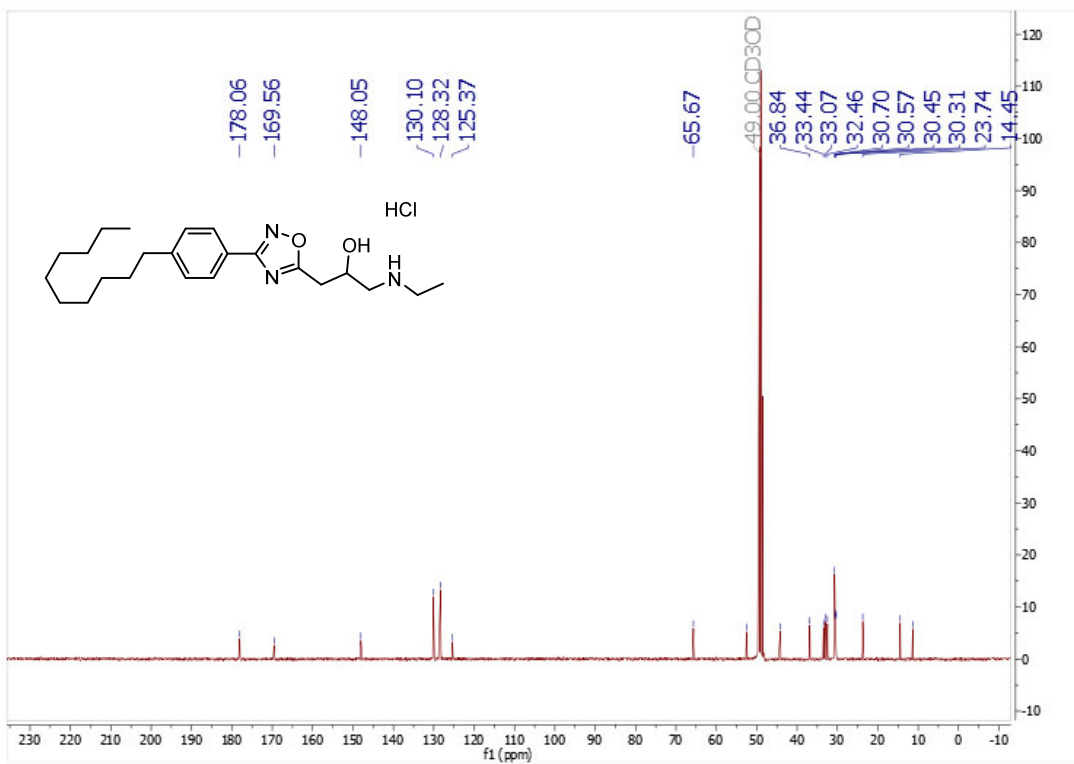

<sup>1</sup>H NMR (400 MHz, CD<sub>3</sub>OD) **23b**

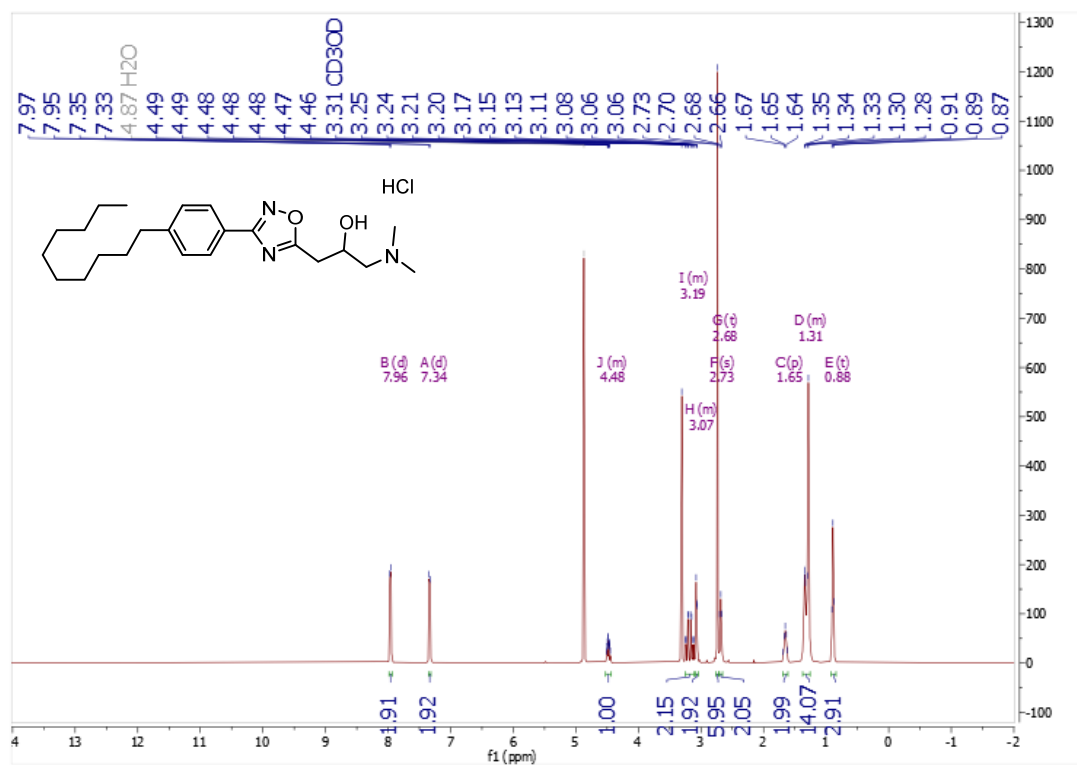

<sup>13</sup>C NMR (101 MHz, CD<sub>3</sub>OD) **23b**

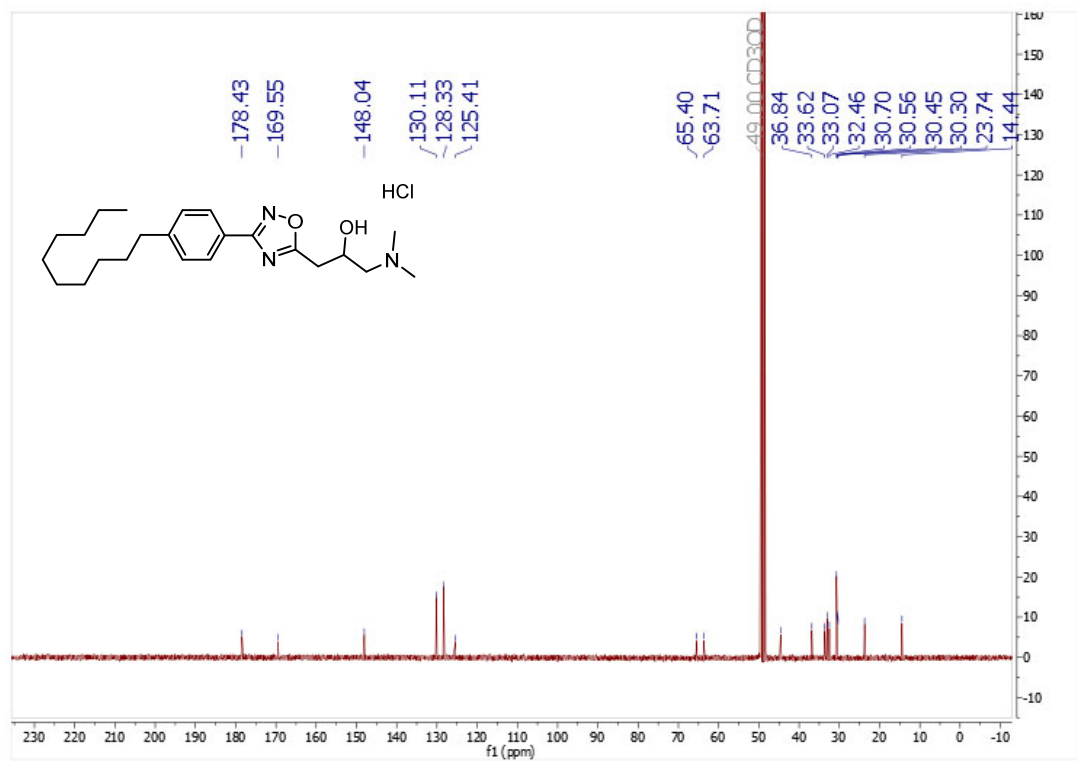

<sup>1</sup>H NMR (400 MHz, CD<sub>3</sub>OD) **28**

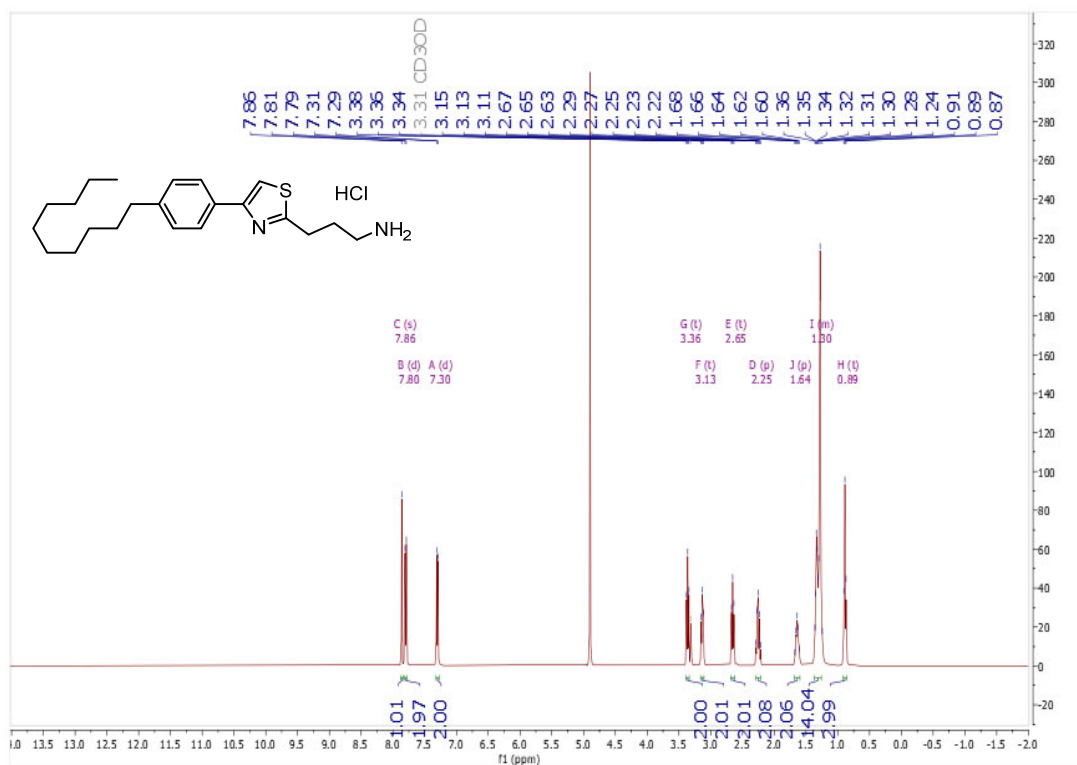

<sup>13</sup>C NMR (101 MHz, CD<sub>3</sub>OD) **28**

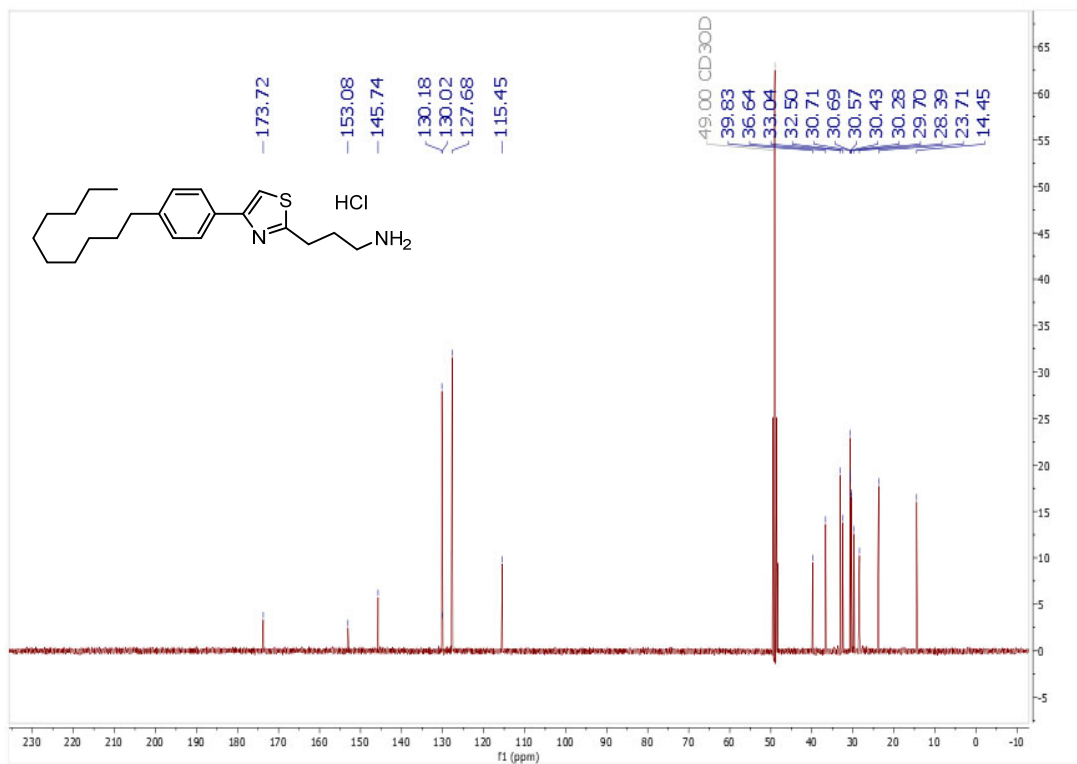

<sup>1</sup>H NMR (400 MHz, CD<sub>3</sub>OD) **30**

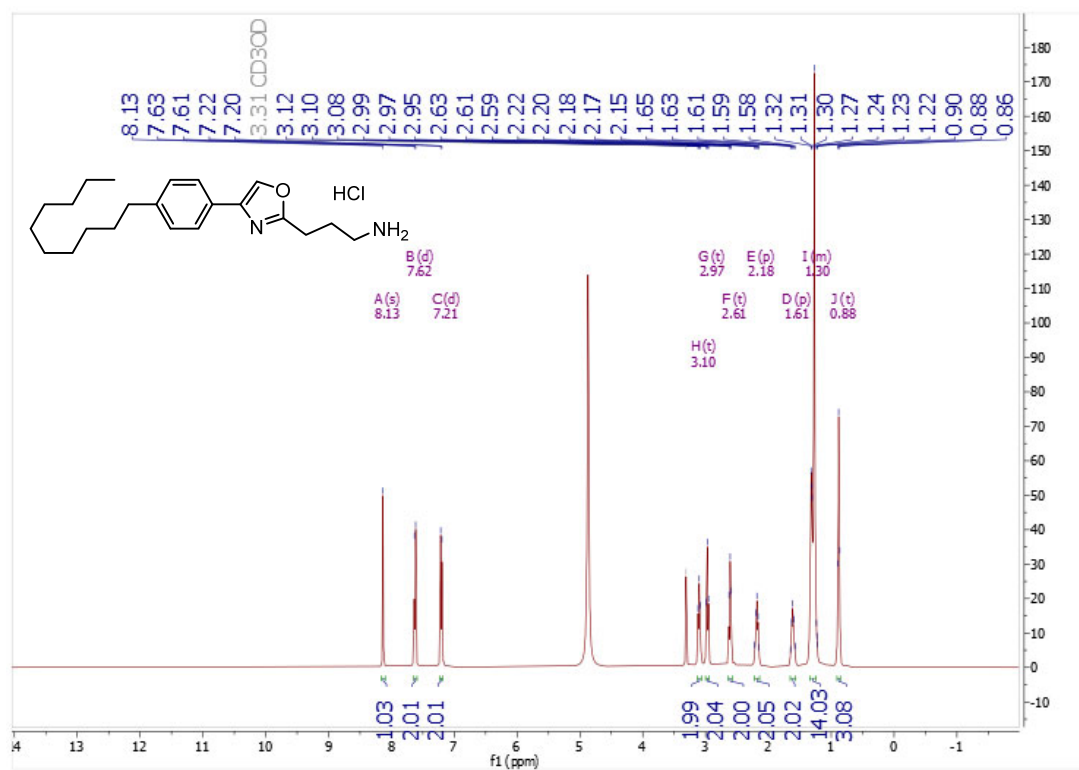

<sup>13</sup>C NMR (101 MHz, CD<sub>3</sub>OD) **30**

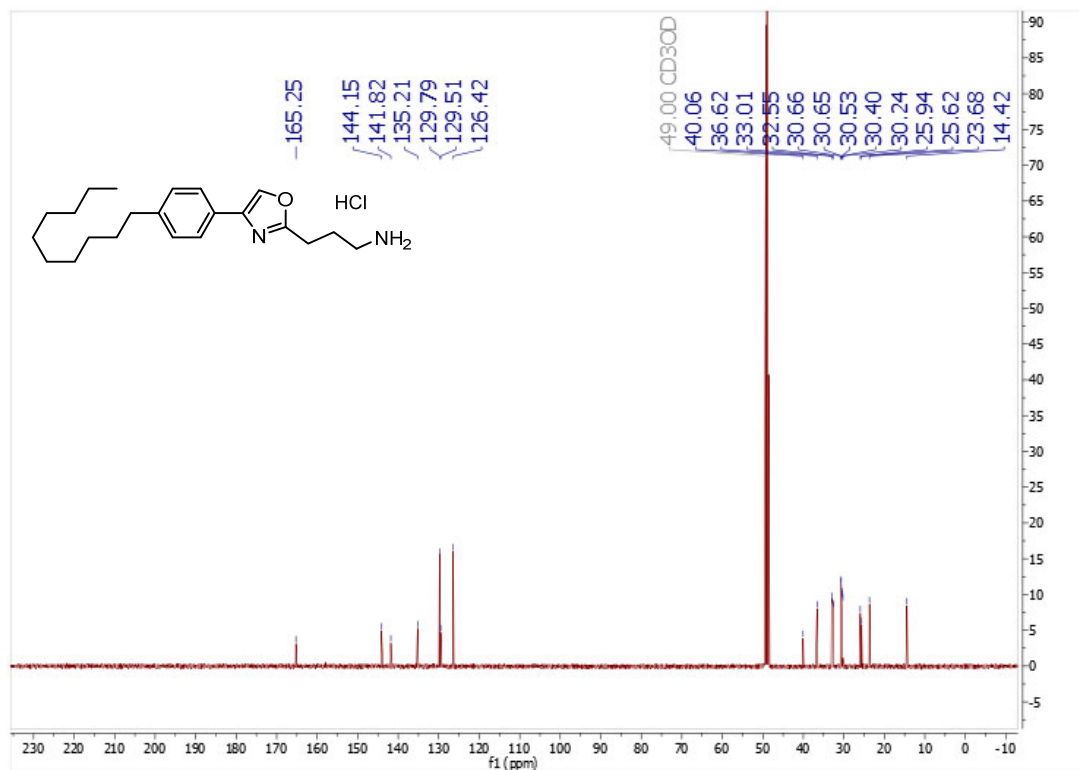

<sup>1</sup>H NMR (400 MHz, CD<sub>3</sub>OD) **32**

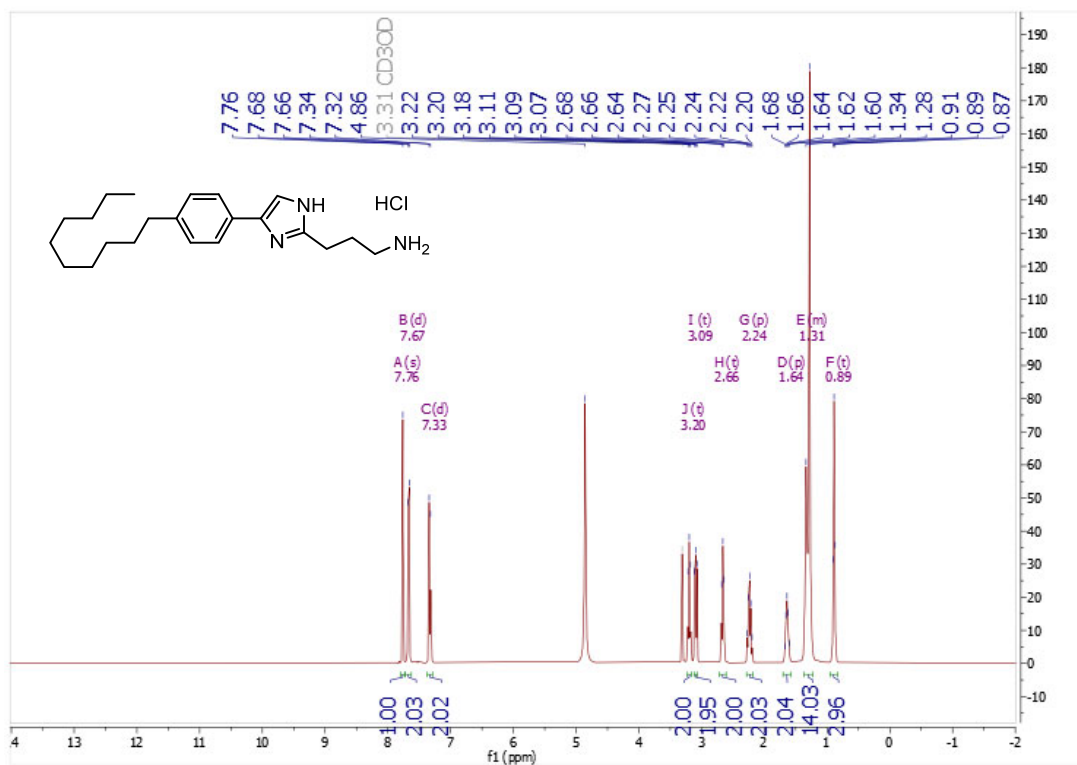

<sup>13</sup>C NMR (101 MHz, CD<sub>3</sub>OD) **32**

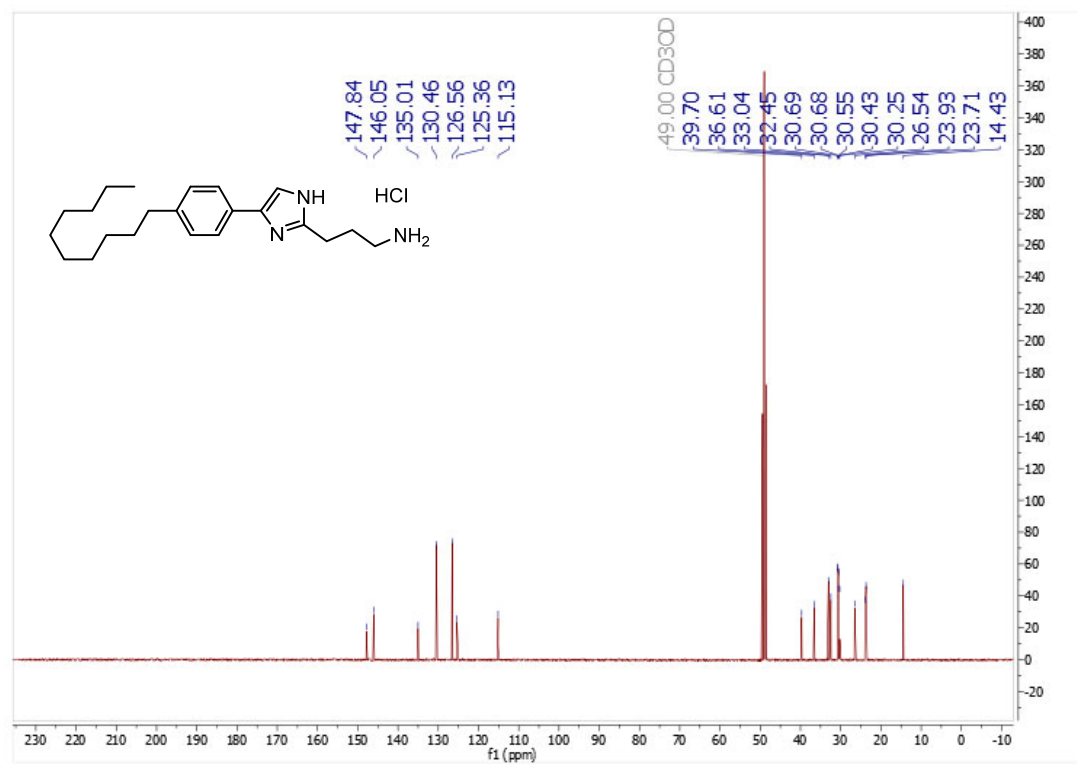

<sup>1</sup>H NMR (400 MHz, CD<sub>3</sub>OD) **34**

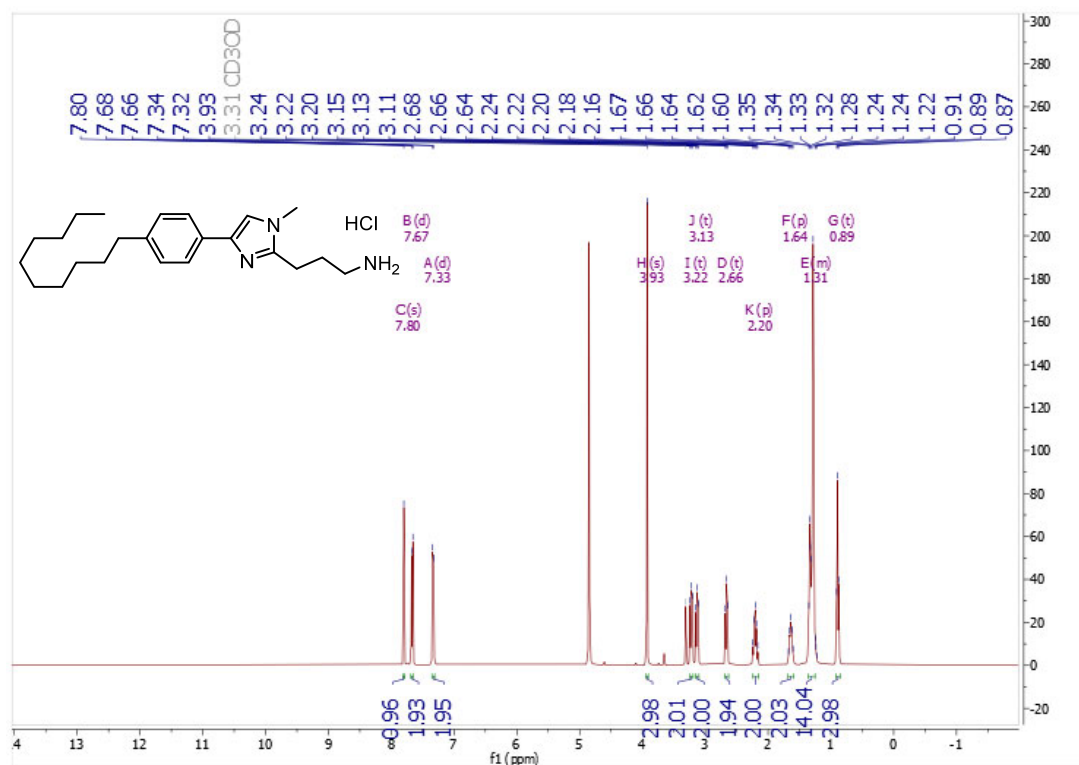

<sup>13</sup>C NMR (101 MHz, CD<sub>3</sub>OD) **34**

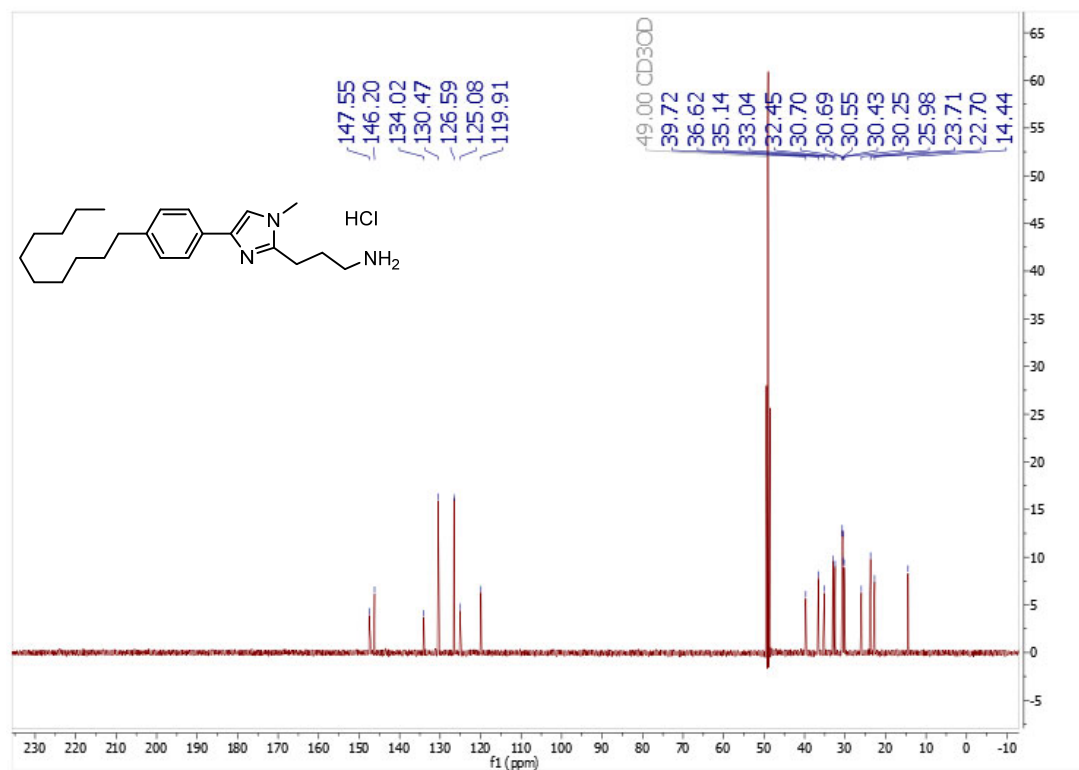



<sup>1</sup>H NMR (400 MHz, CD<sub>3</sub>OD) **38**

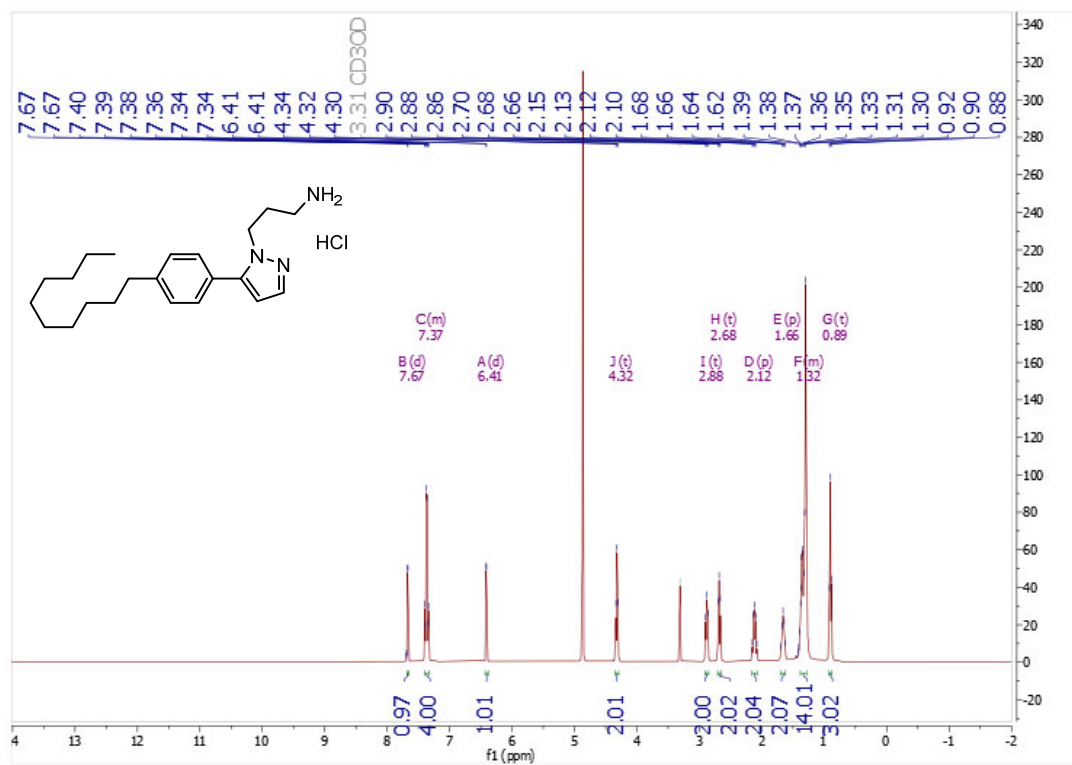

<sup>13</sup>C NMR (101 MHz, CD<sub>3</sub>OD) **38**

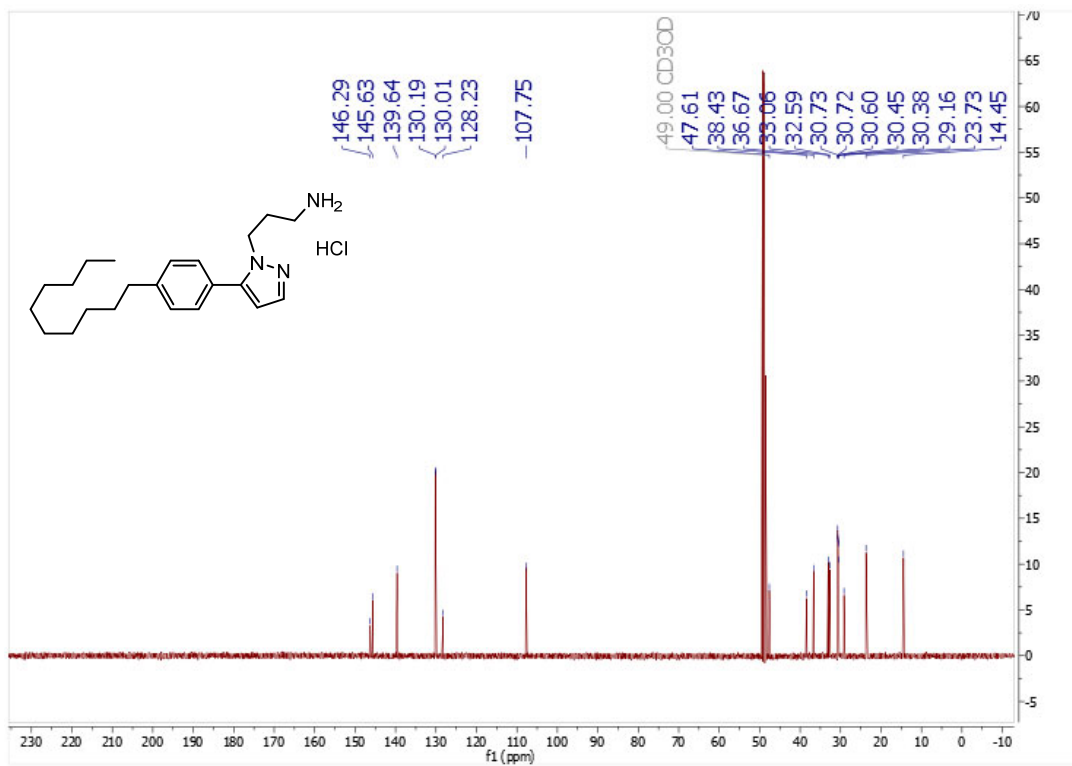

<sup>1</sup>H NMR (400 MHz, CD<sub>3</sub>OD) **40**

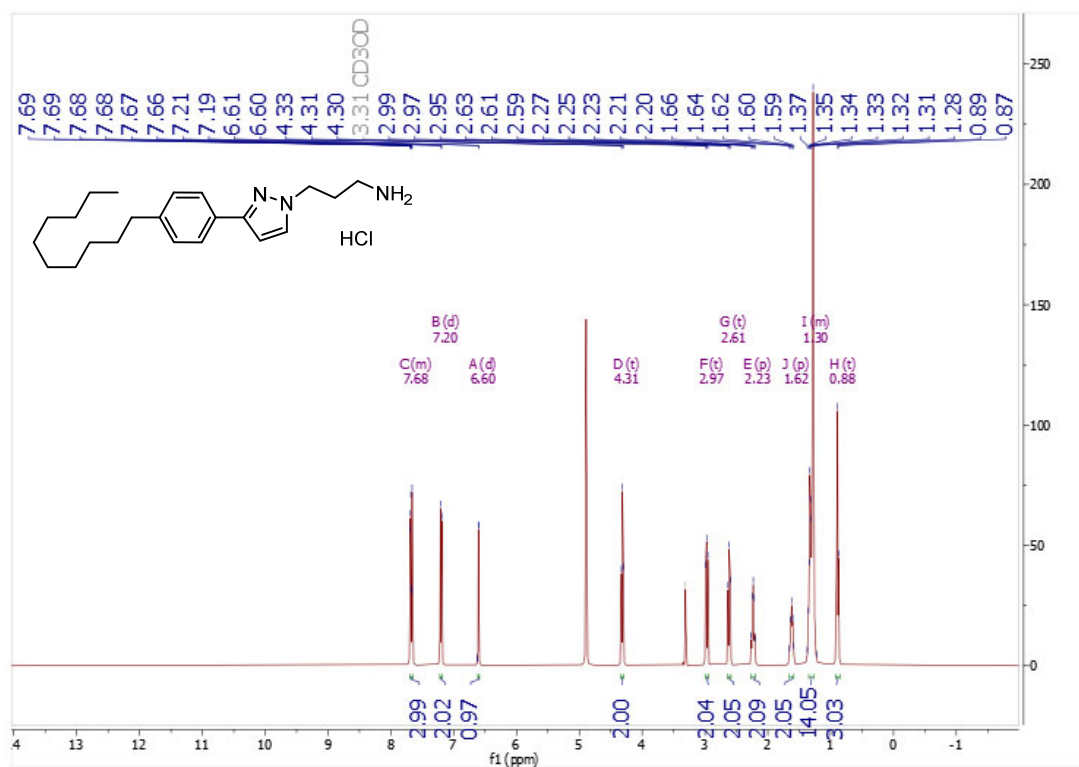

<sup>13</sup>C NMR (101 MHz, CD<sub>3</sub>OD) **40**

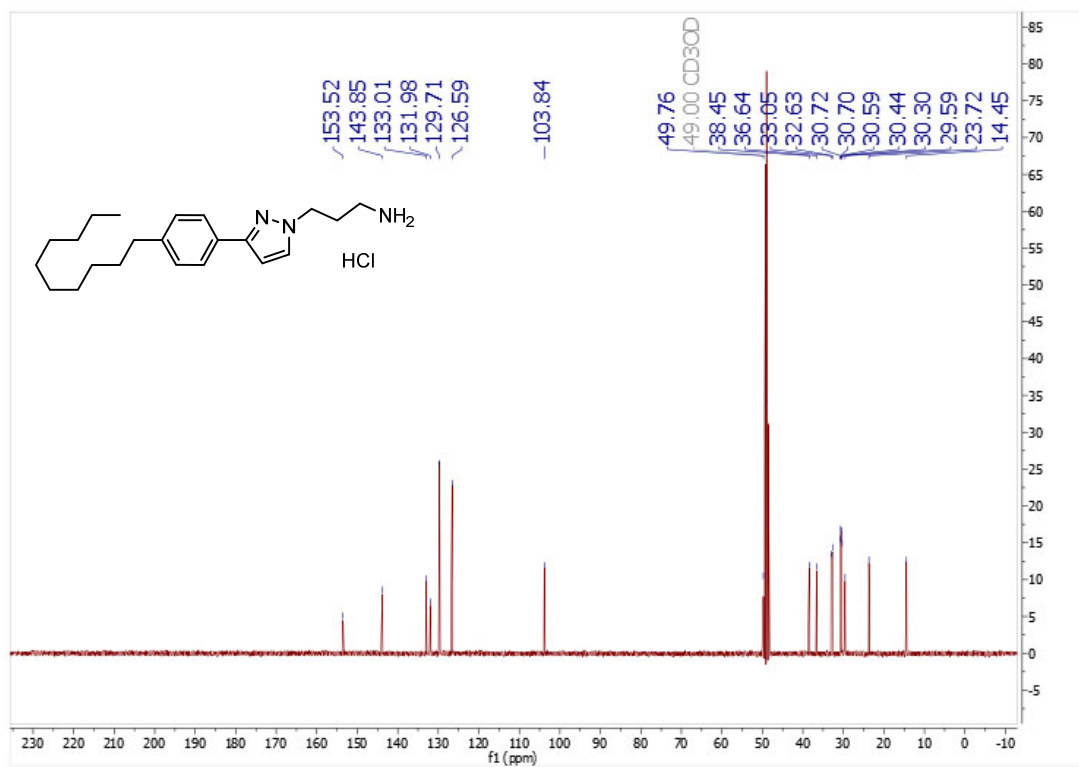

<sup>1</sup>H NMR (400 MHz, CD<sub>3</sub>OD) 42

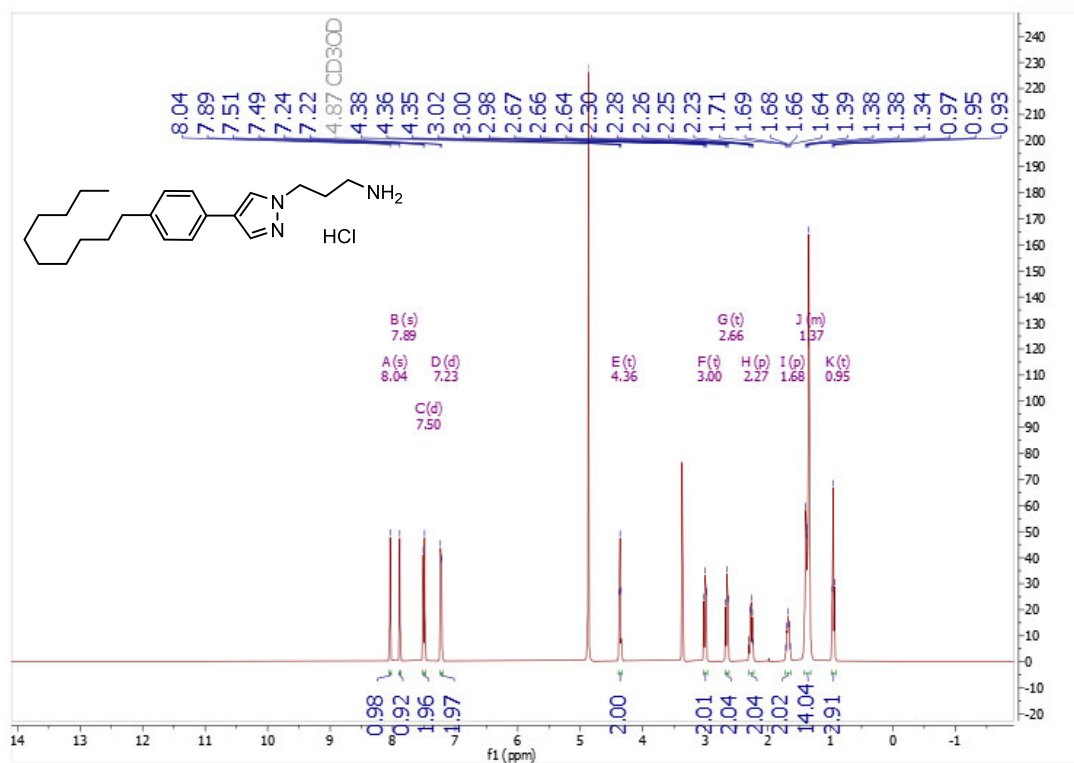

<sup>13</sup>C NMR (101 MHz, CD<sub>3</sub>OD) 42

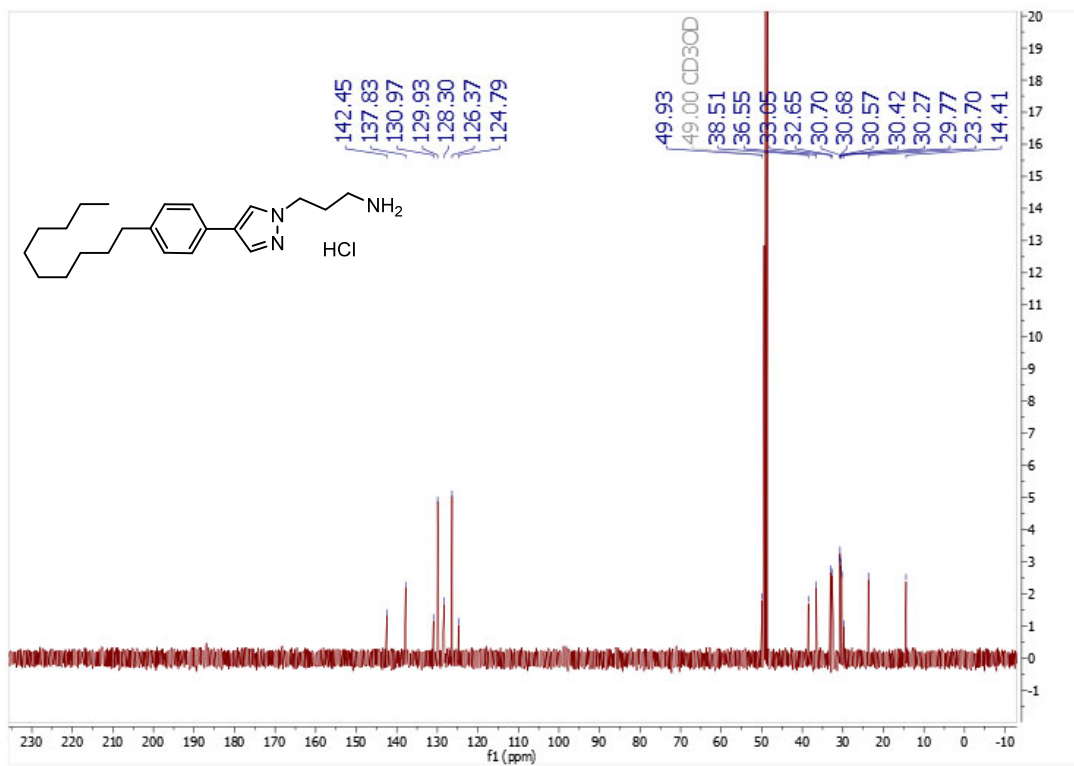

<sup>1</sup>H NMR (400 MHz, CD<sub>3</sub>OD) 47

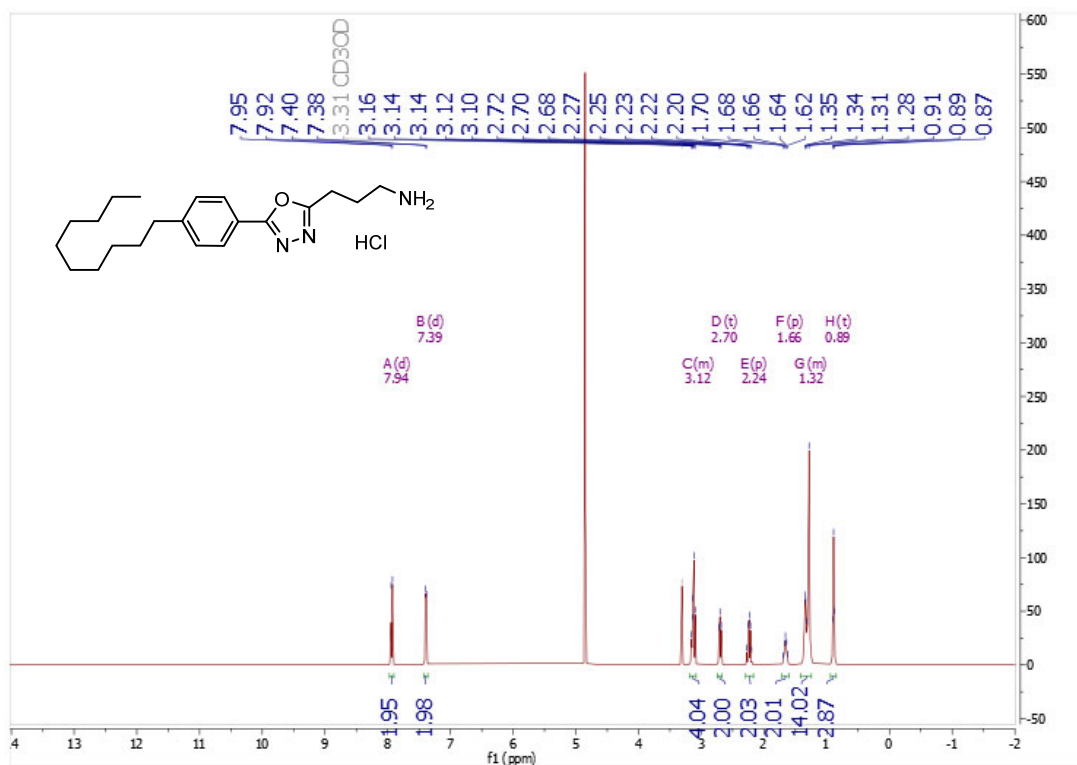

<sup>13</sup>C NMR (101 MHz, CD<sub>3</sub>OD) 47

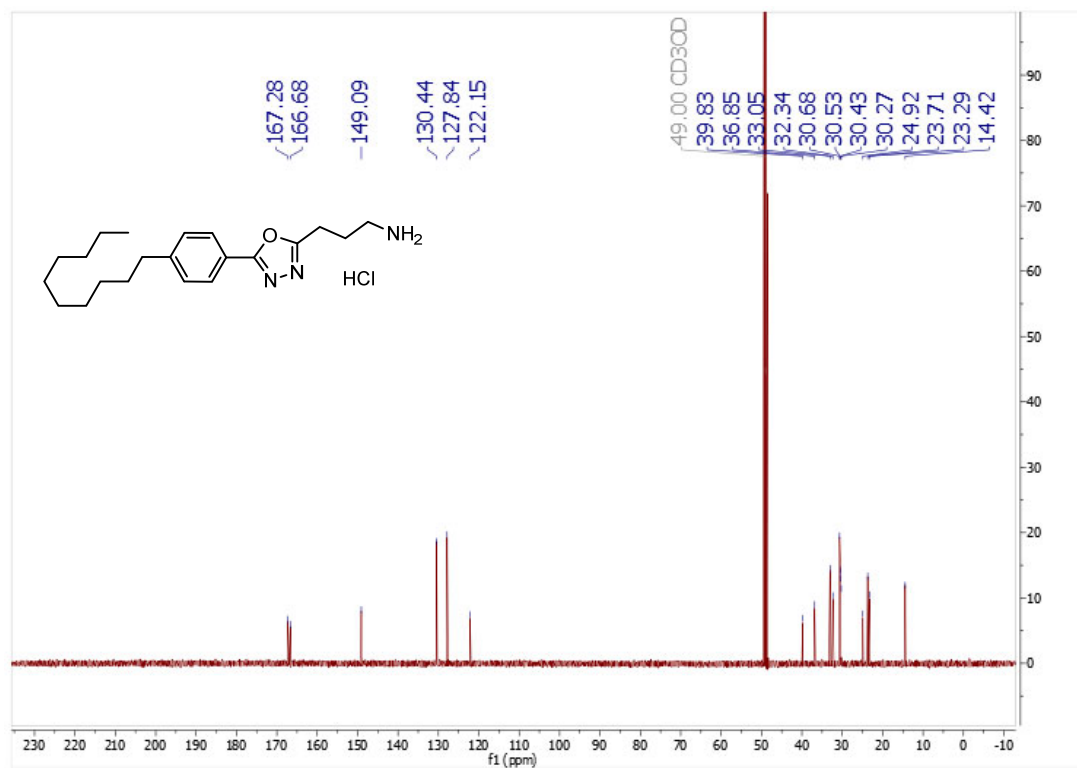

<sup>1</sup>H NMR (400 MHz, CD<sub>3</sub>OD) **52a**

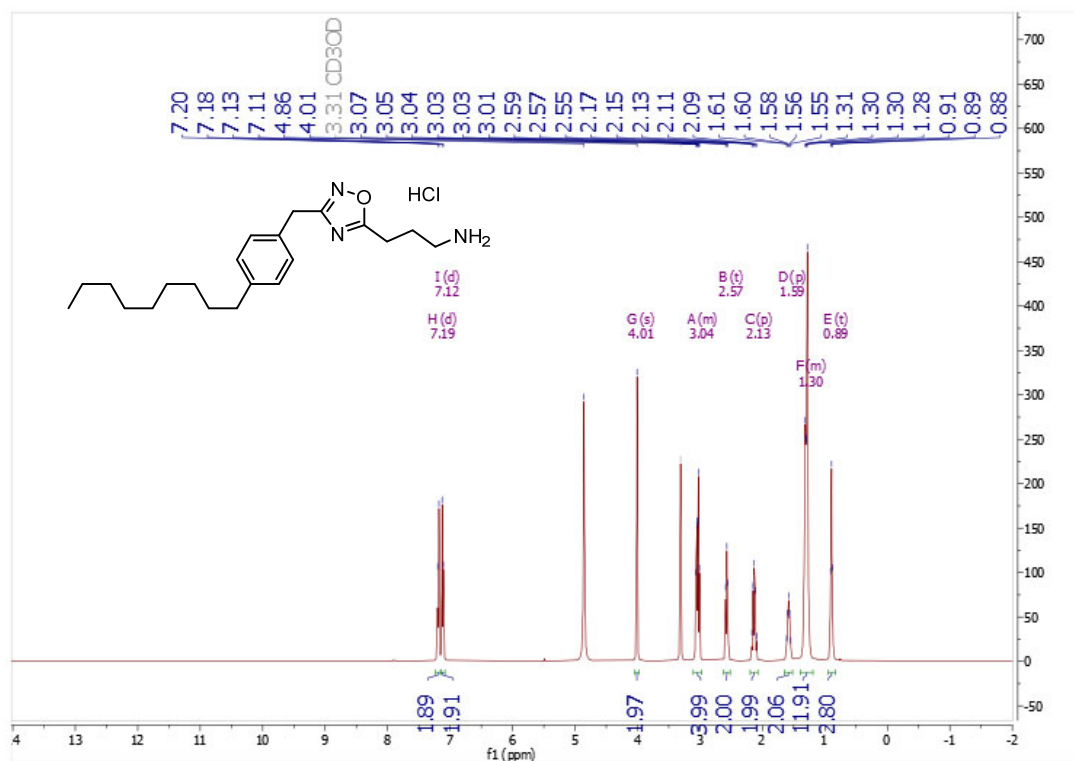

<sup>13</sup>C NMR (101 MHz, CD<sub>3</sub>OD) **52a**

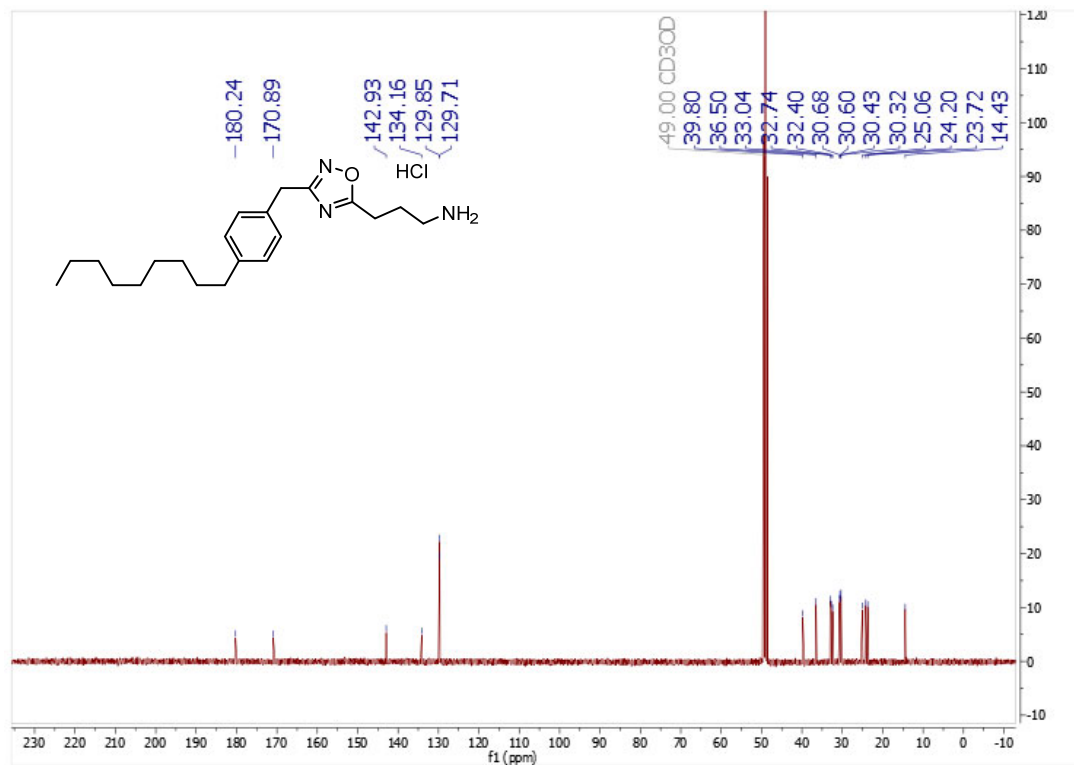

<sup>1</sup>H NMR (400 MHz, CD<sub>3</sub>OD) **52b**

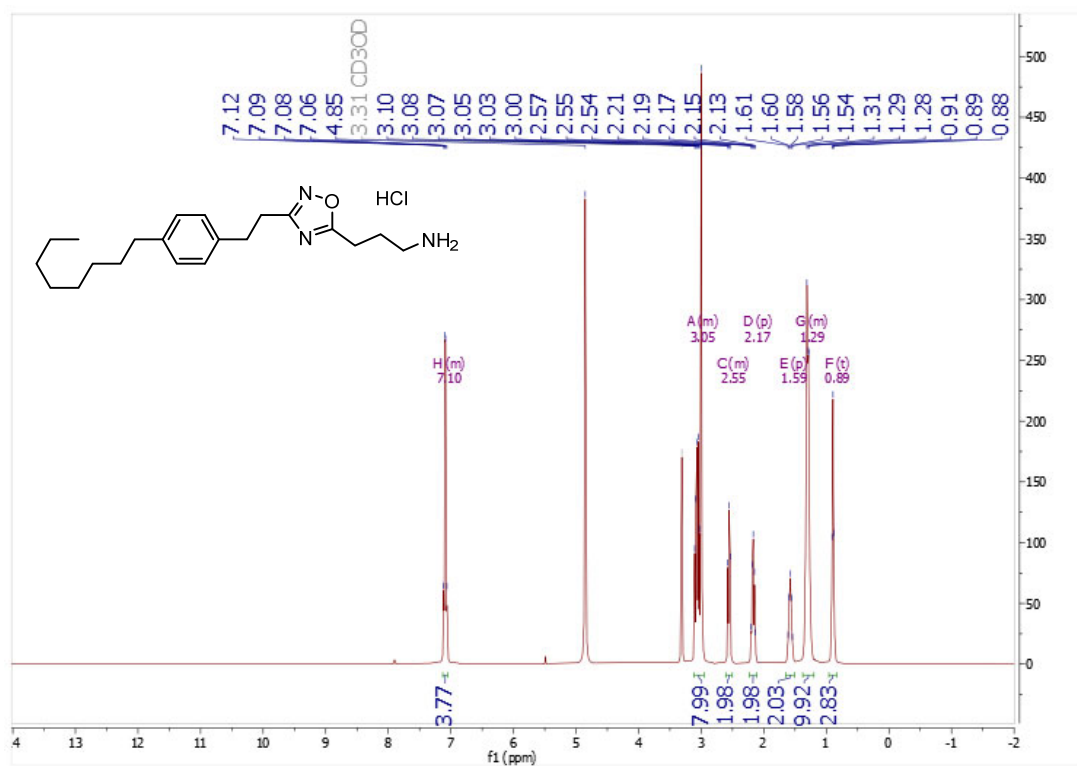

<sup>13</sup>C NMR (101 MHz, CD<sub>3</sub>OD) **52b**

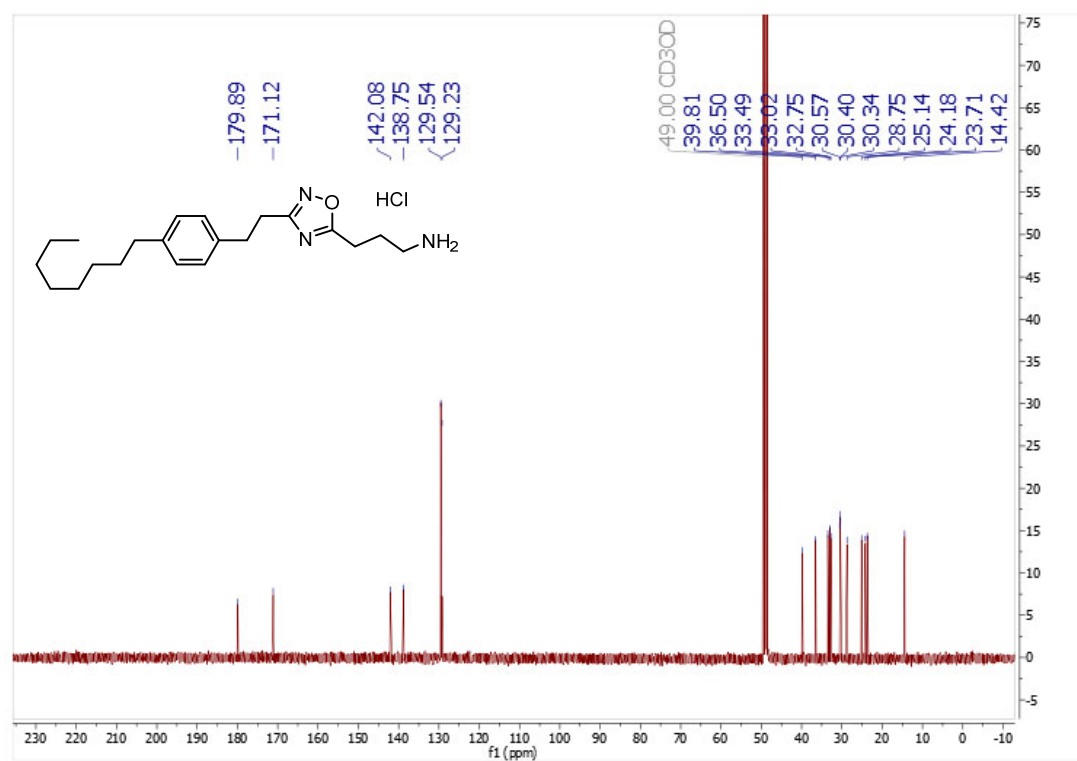

$^1\text{H}$  NMR (400 MHz,  $\text{CD}_3\text{OD}$ ) **57b**

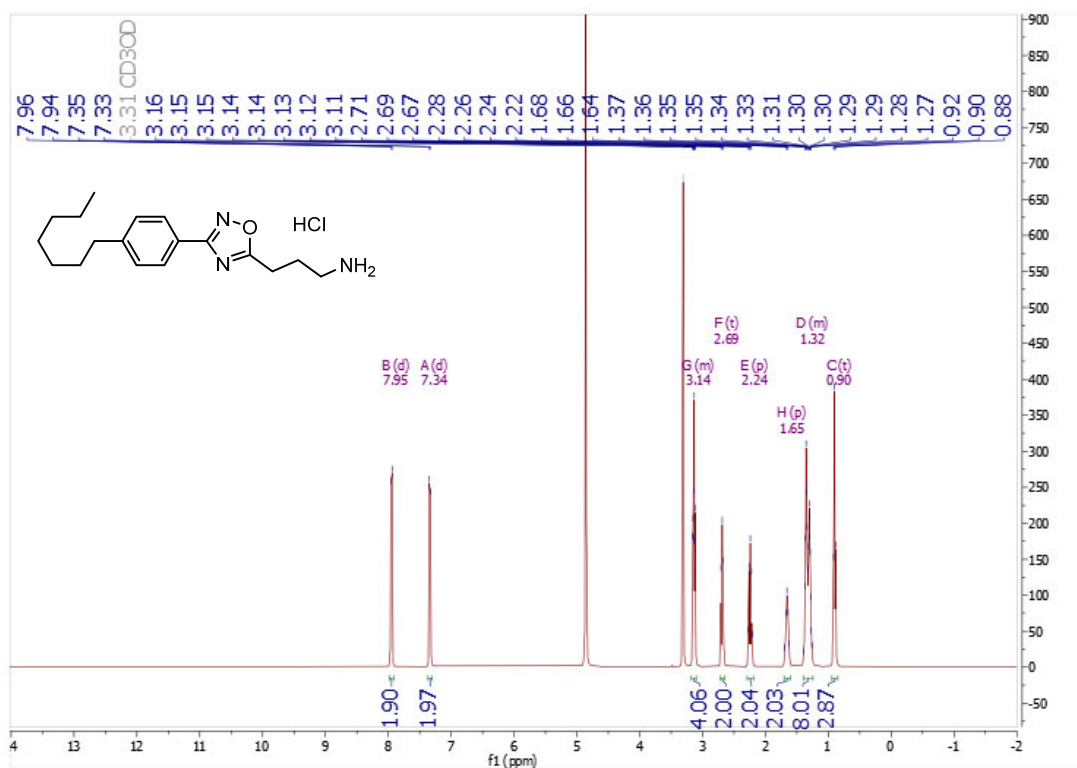

$^{13}\text{C}$  NMR (101 MHz,  $\text{CD}_3\text{OD}$ ) **57b**

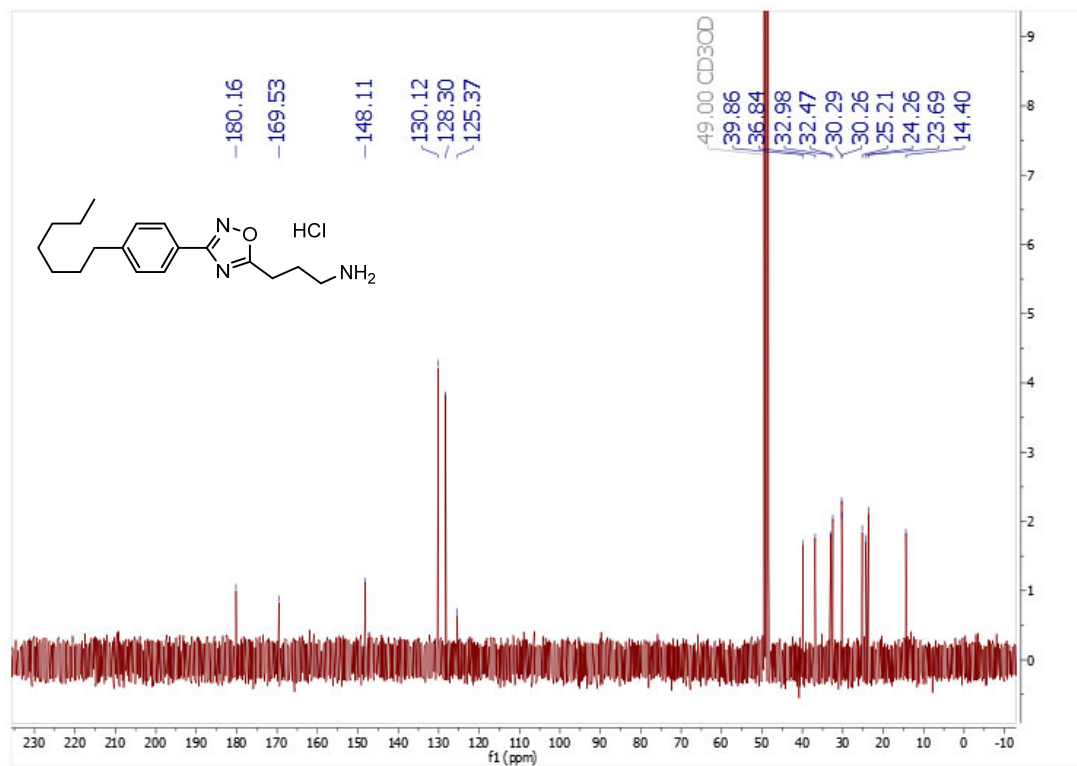

$^1\text{H}$  NMR (400 MHz,  $\text{CD}_3\text{OD}$ ) **57c**

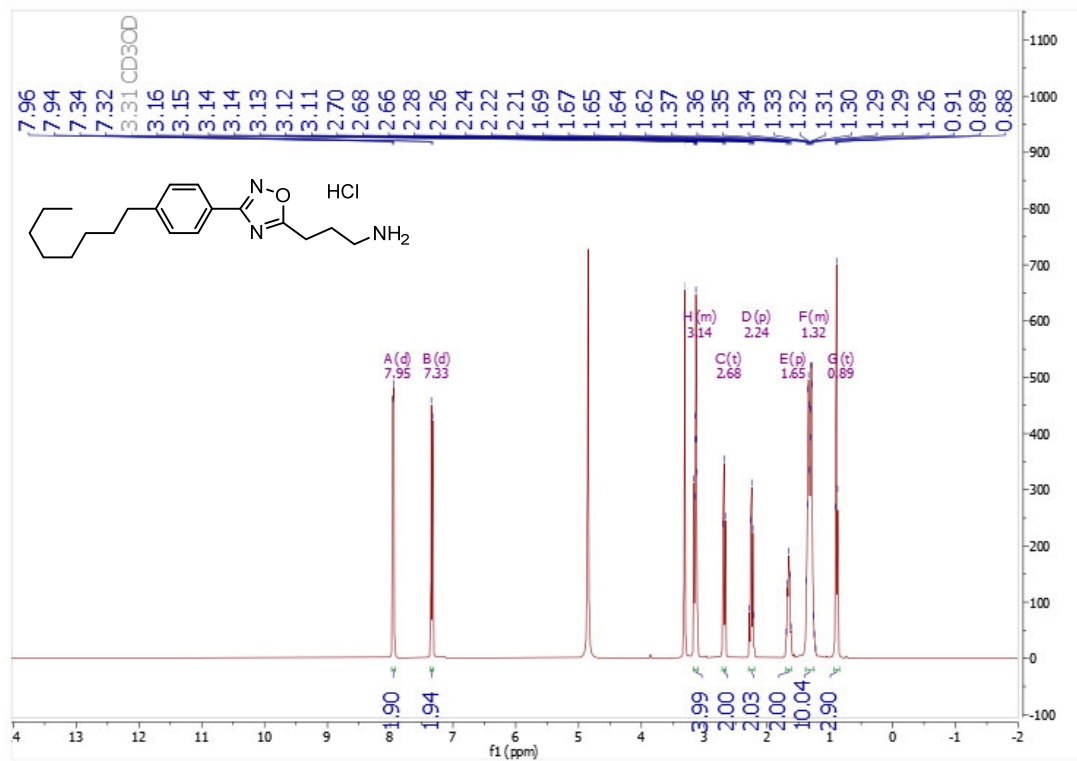

$^{13}\text{C}$  NMR (101 MHz,  $\text{CD}_3\text{OD}$ ) **57c**

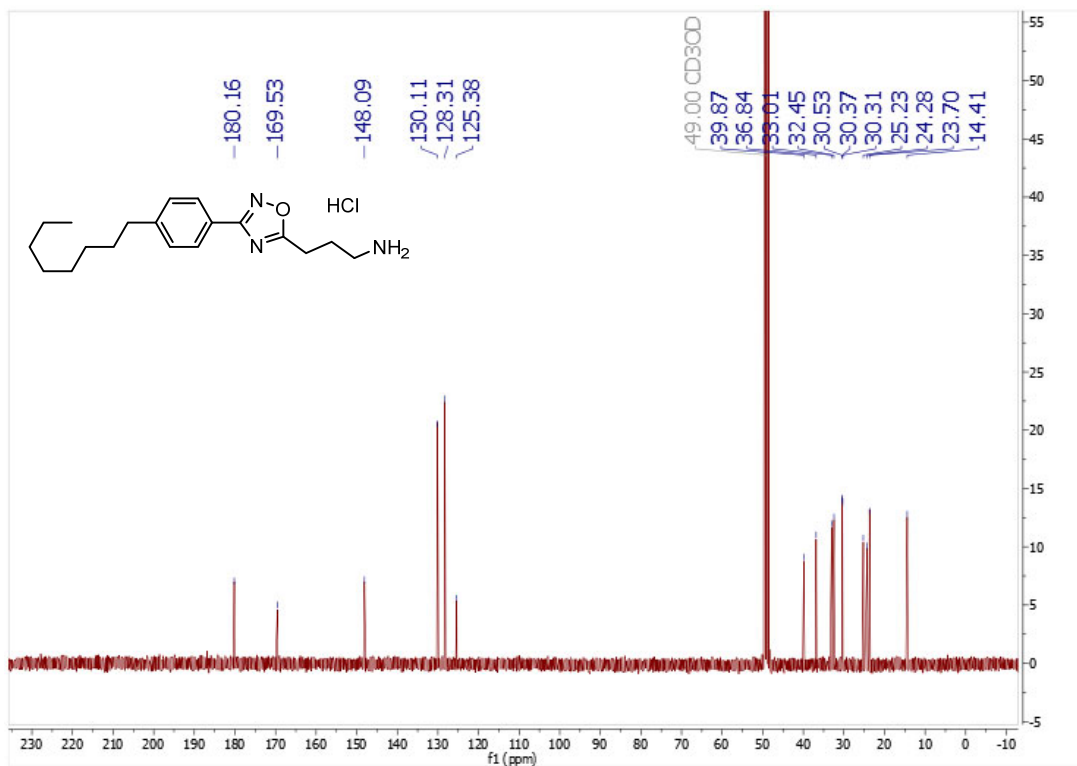



<sup>1</sup>H NMR (400 MHz, CD<sub>3</sub>OD) **57d**

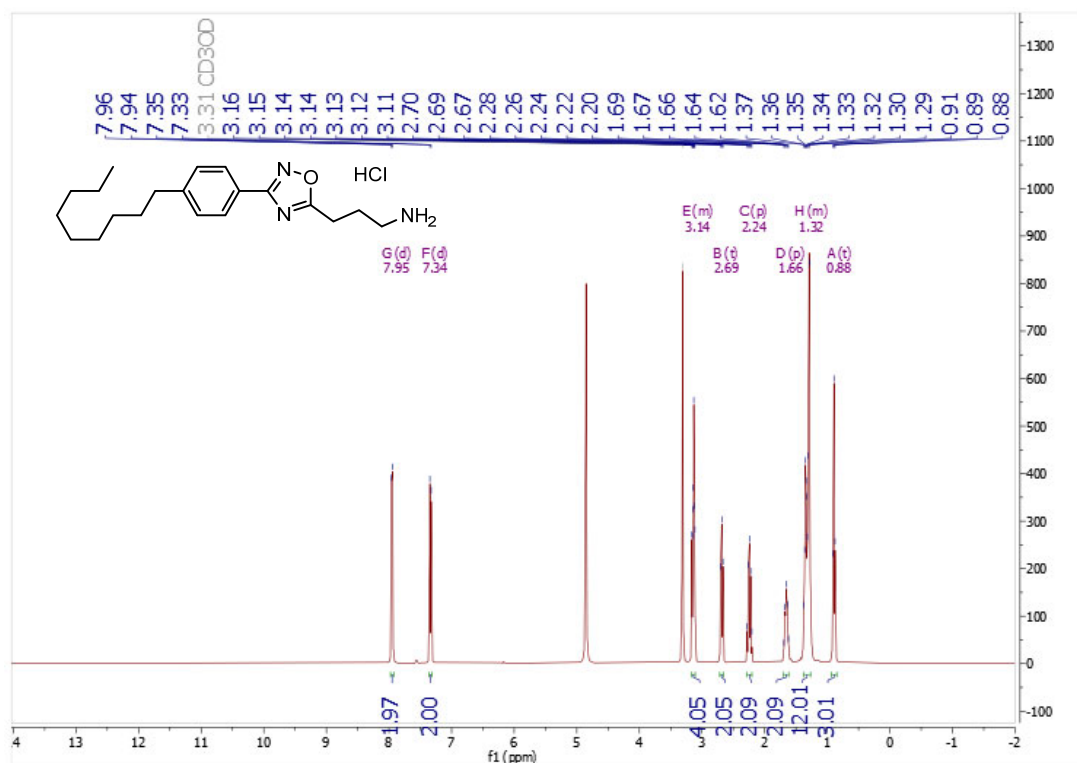

<sup>13</sup>C NMR (101 MHz, CD<sub>3</sub>OD) **57d**

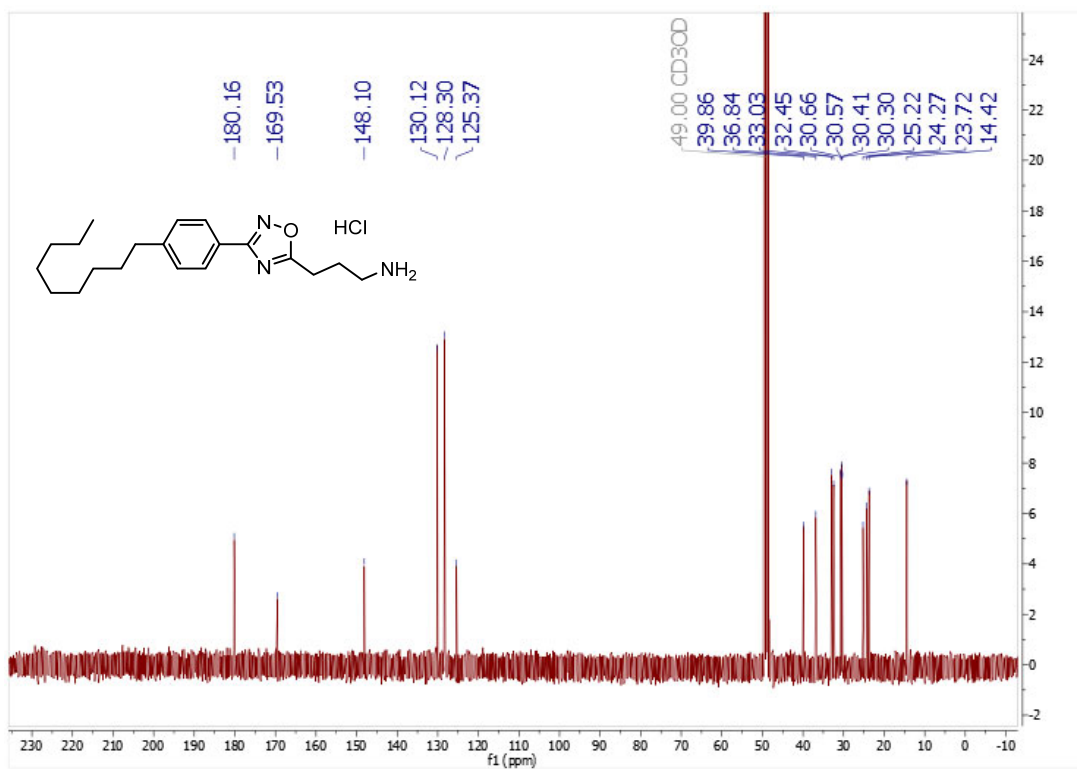

$^1\text{H}$  NMR (400 MHz,  $\text{CD}_3\text{OD}$ ) **57e**

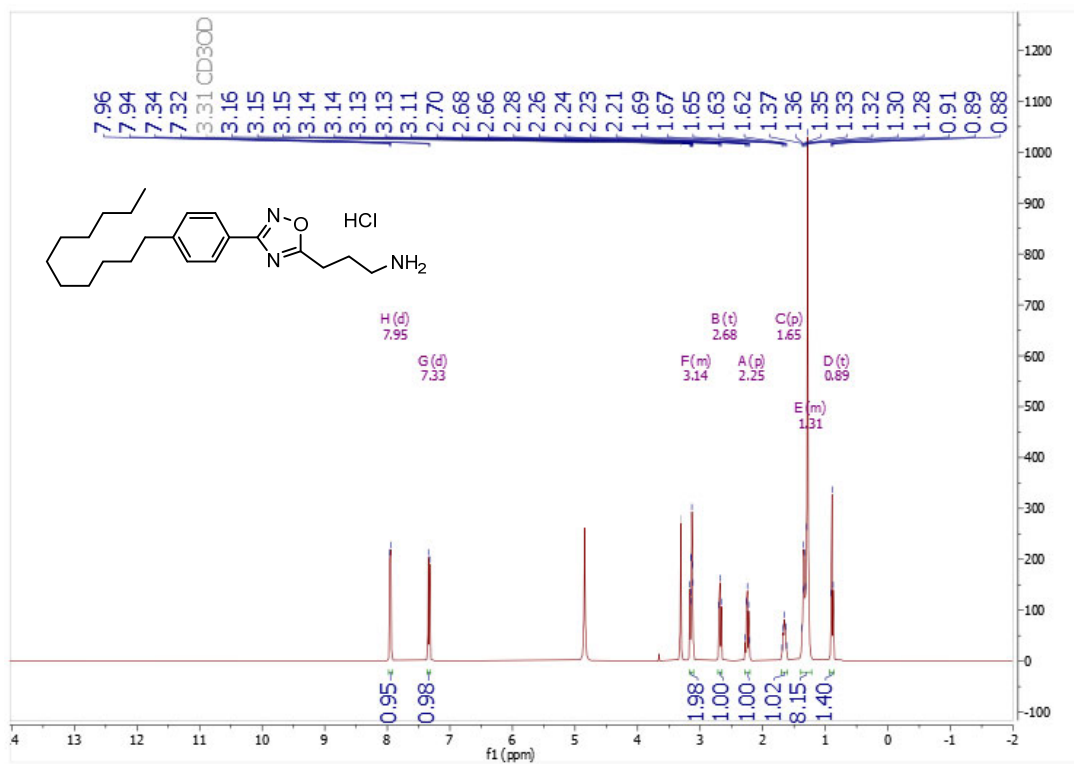

$^{13}\text{C}$  NMR (101 MHz,  $\text{CD}_3\text{OD}$ ) **57e**

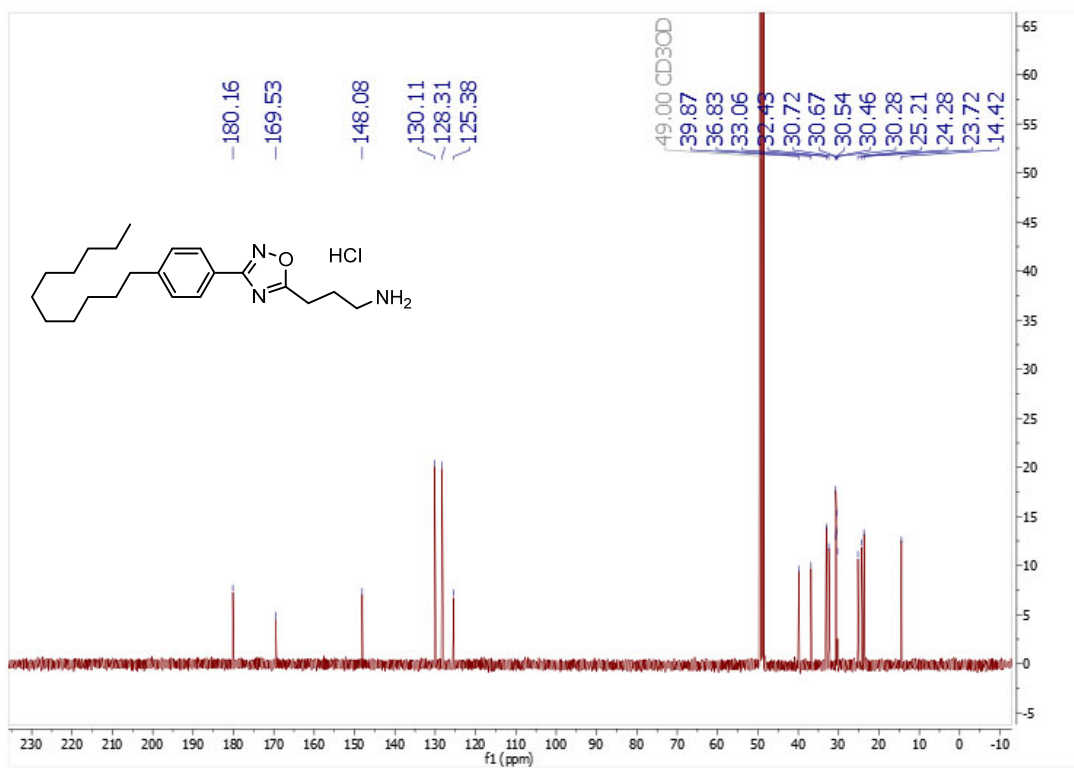

<sup>1</sup>H NMR (400 MHz, CD<sub>3</sub>OD) **62a**

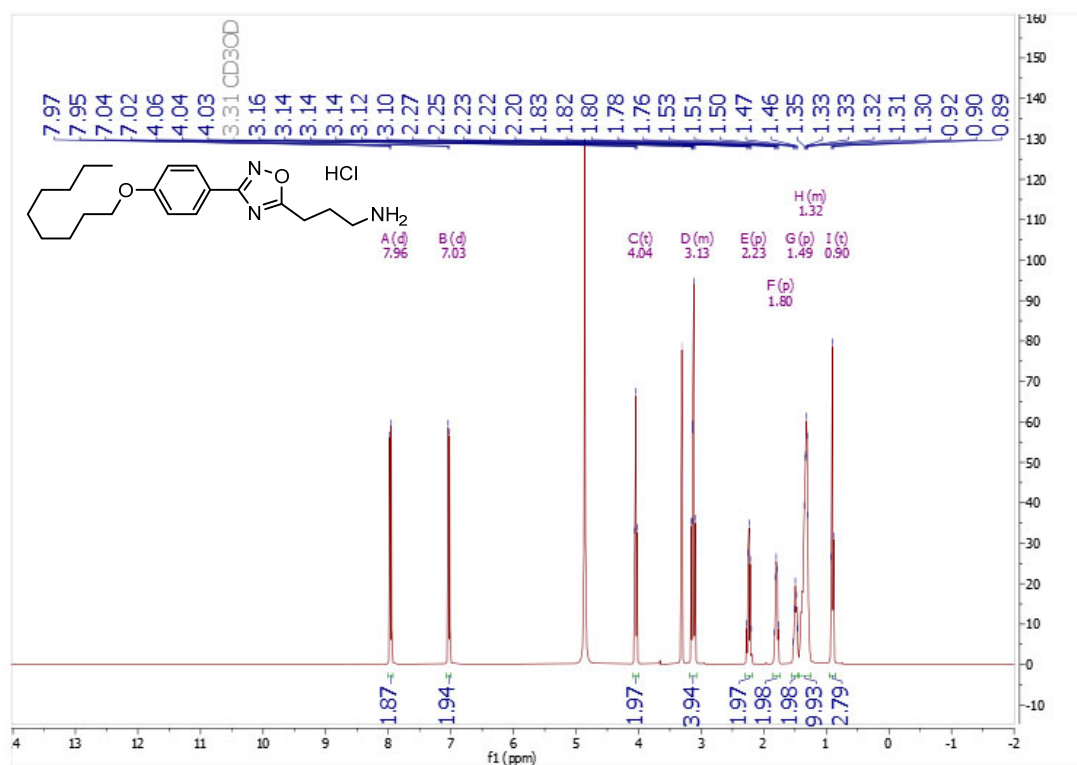

<sup>13</sup>C NMR (101 MHz, CD<sub>3</sub>OD) **62a**

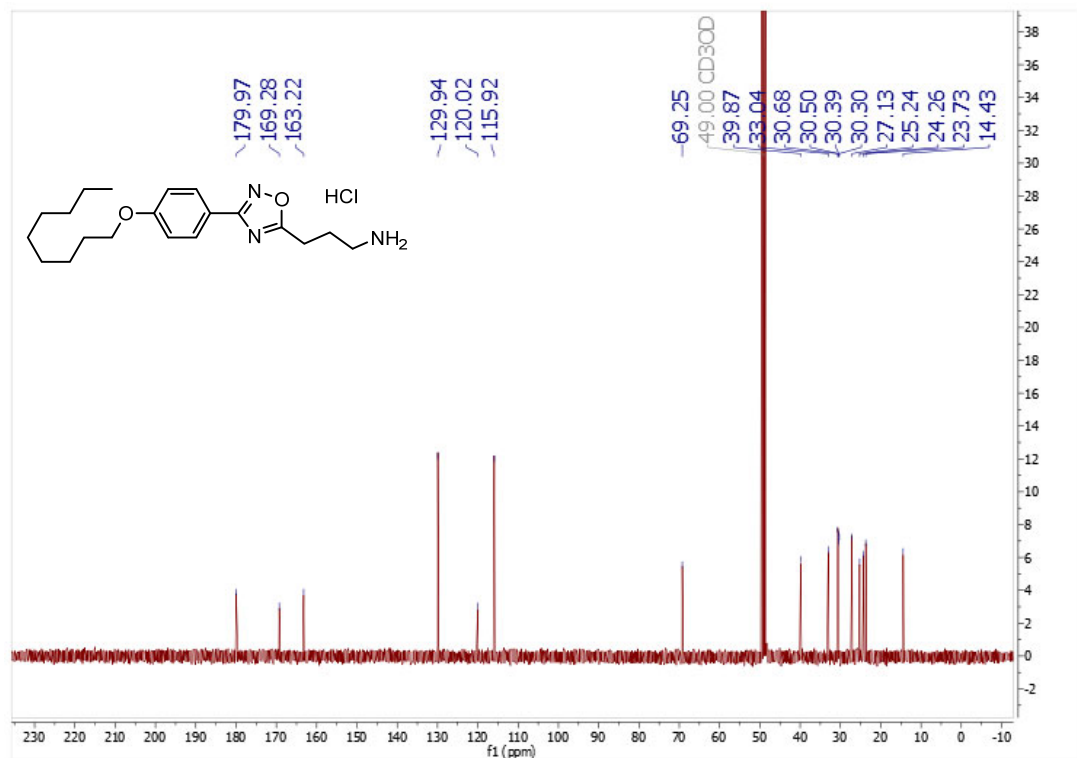

<sup>1</sup>H NMR (400 MHz, CD<sub>3</sub>OD) **62c**

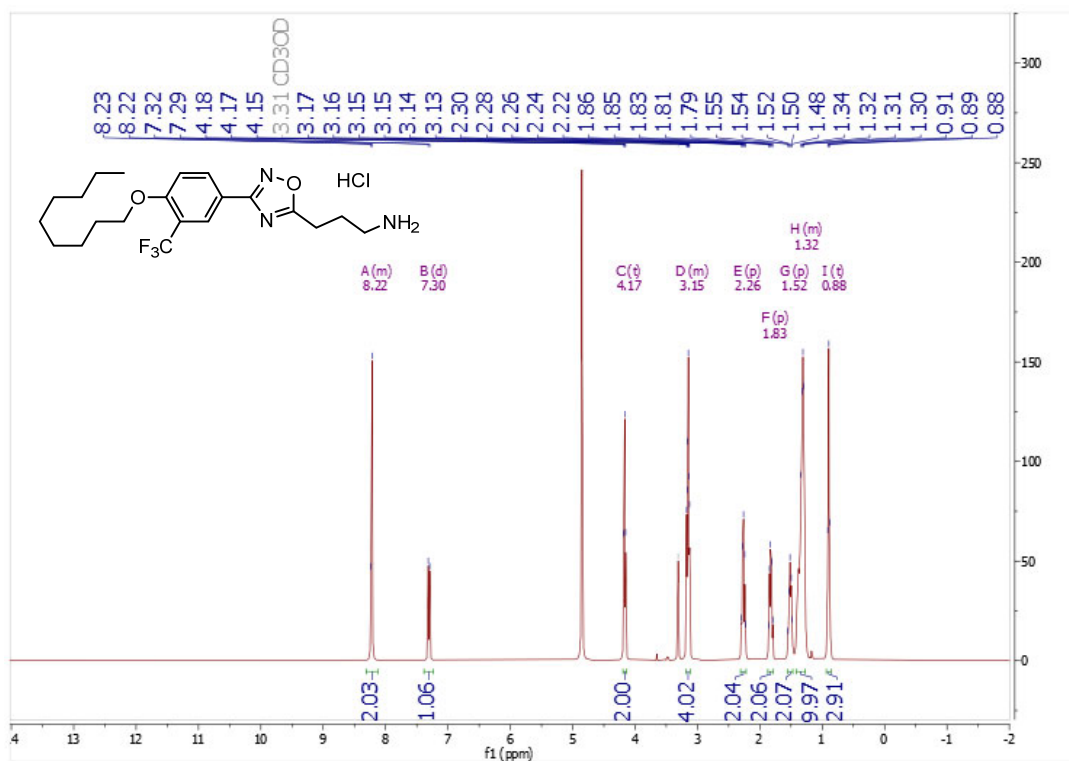

<sup>13</sup>C NMR (101 MHz, CD<sub>3</sub>OD) **62c**

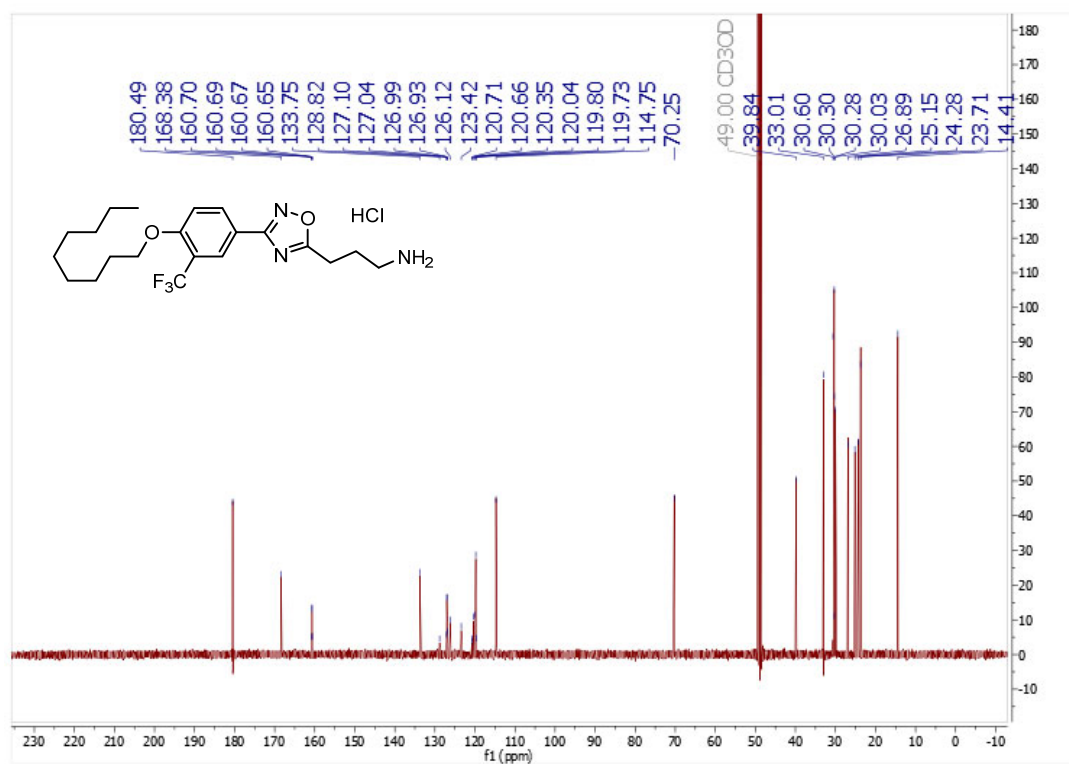

$^{19}\text{F}$  NMR (376 MHz,  $\text{CD}_3\text{OD}$ ) **62c**

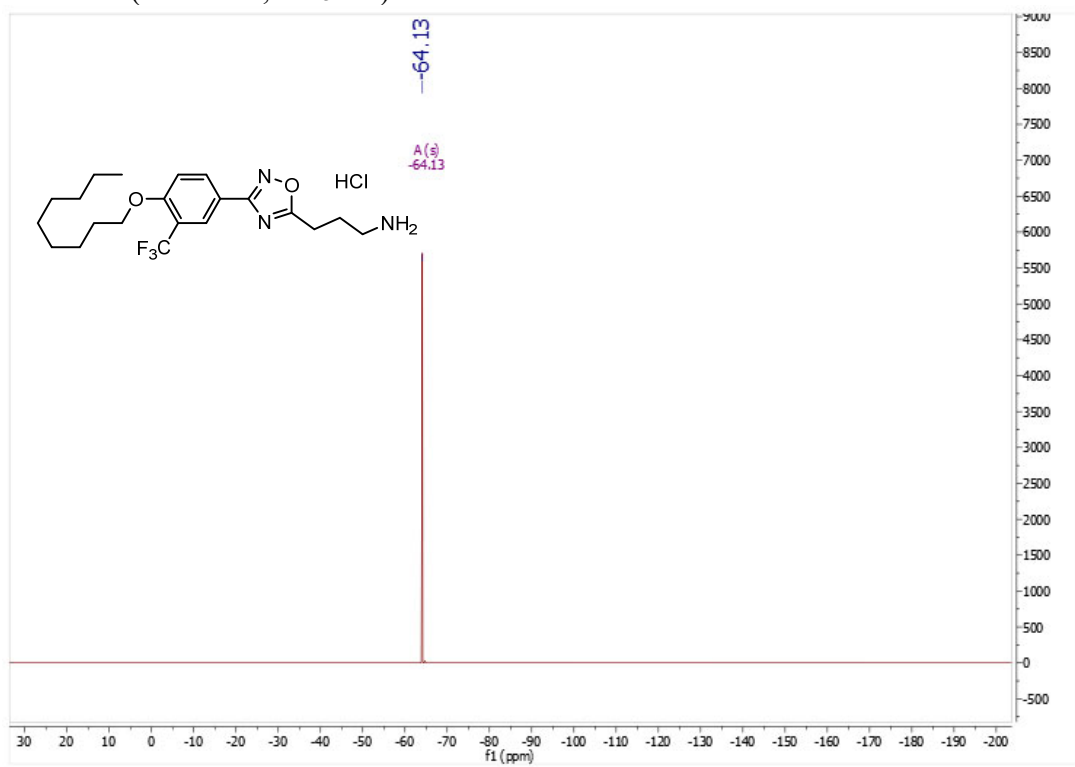

<sup>1</sup>H NMR (400 MHz, CD<sub>3</sub>OD) **62d**

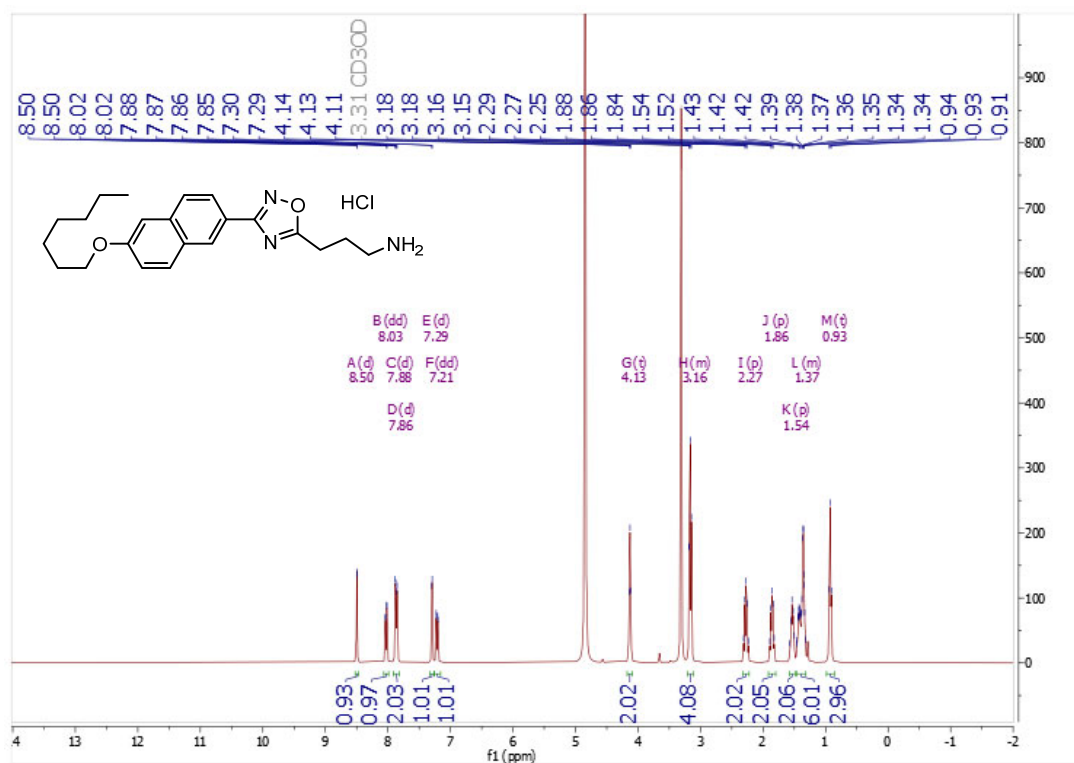

<sup>13</sup>C NMR (101 MHz, CD<sub>3</sub>OD) **62d**

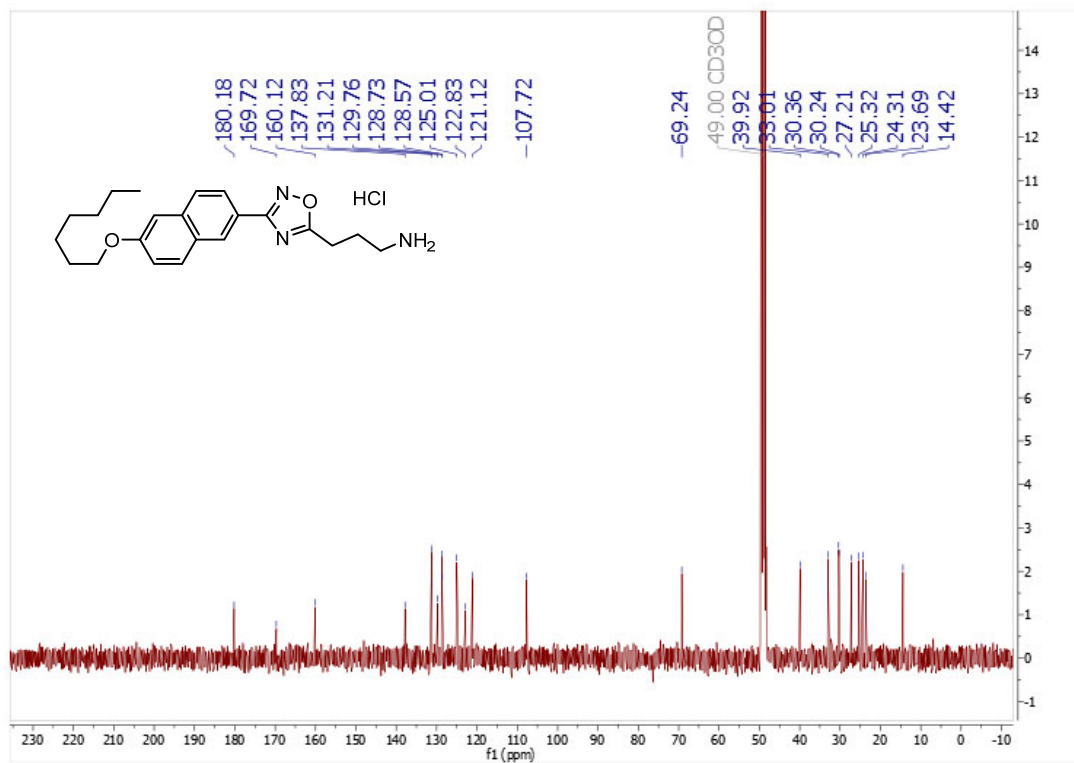

$^1\text{H}$  NMR (400 MHz,  $\text{CD}_3\text{OD}$ ) **67**

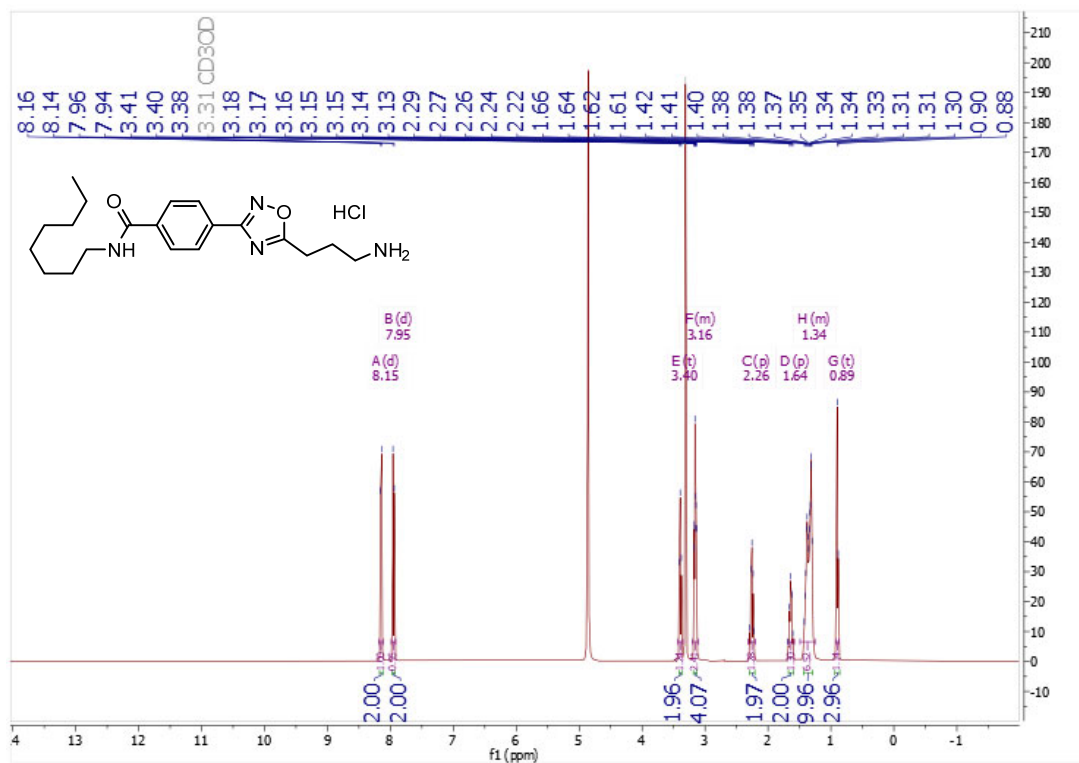

$^{13}\text{C}$  NMR (101 MHz,  $\text{CD}_3\text{OD}$ ) **67**

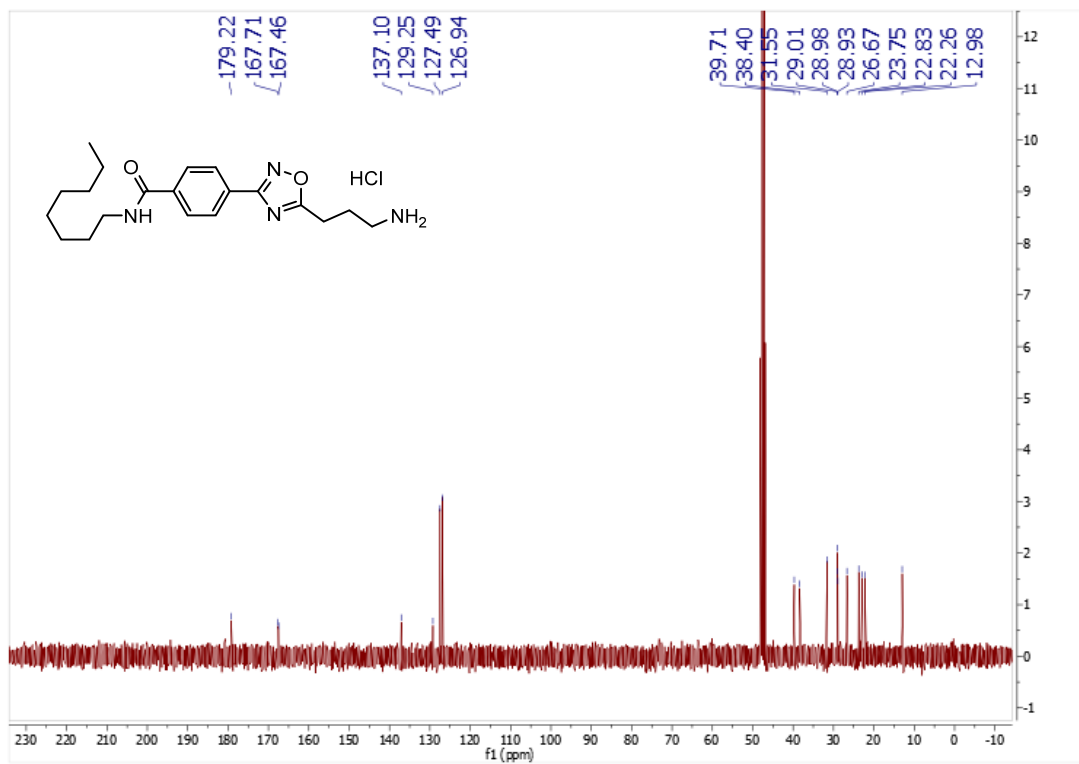

<sup>1</sup>H NMR (400 MHz, CD<sub>3</sub>OD) **72a**

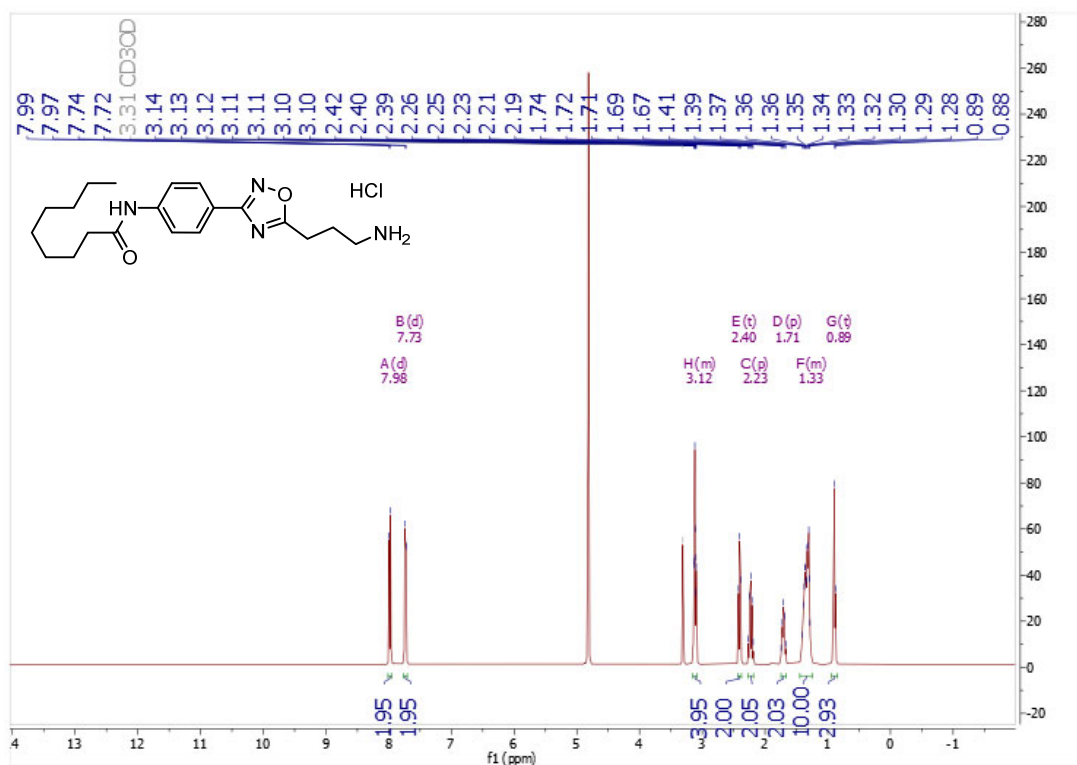

<sup>13</sup>C NMR (101 MHz, CD<sub>3</sub>OD) **72a**

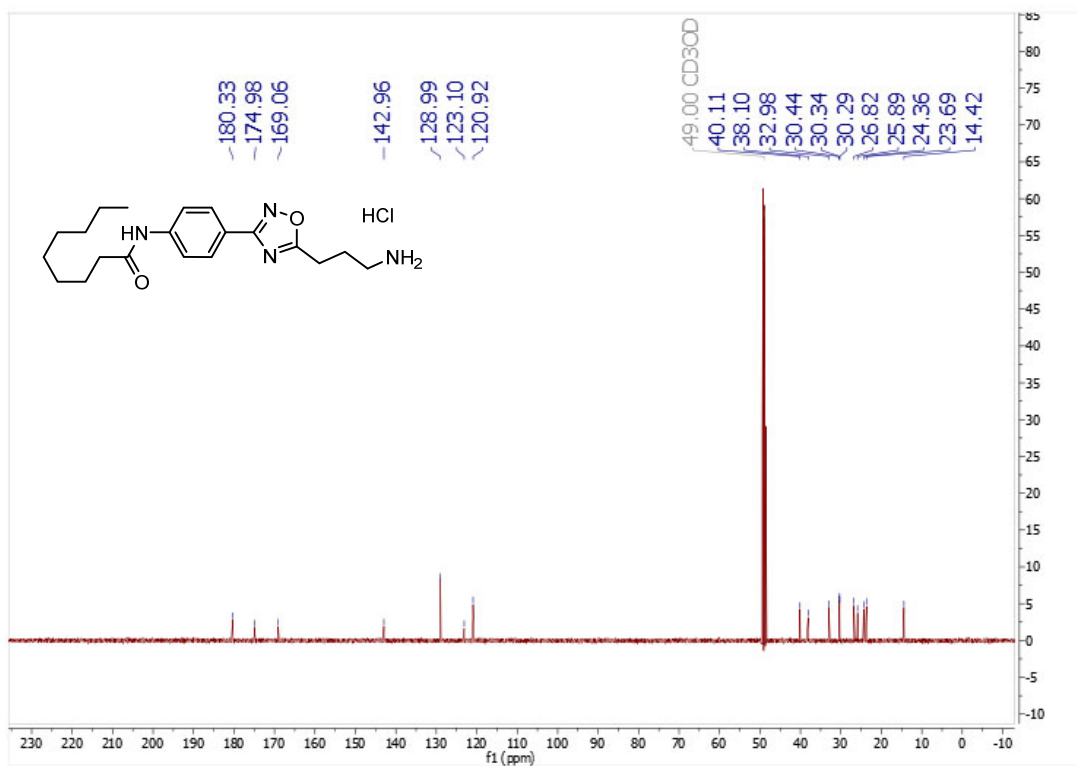



<sup>1</sup>H NMR (400 MHz, CD<sub>3</sub>OD) **72b**

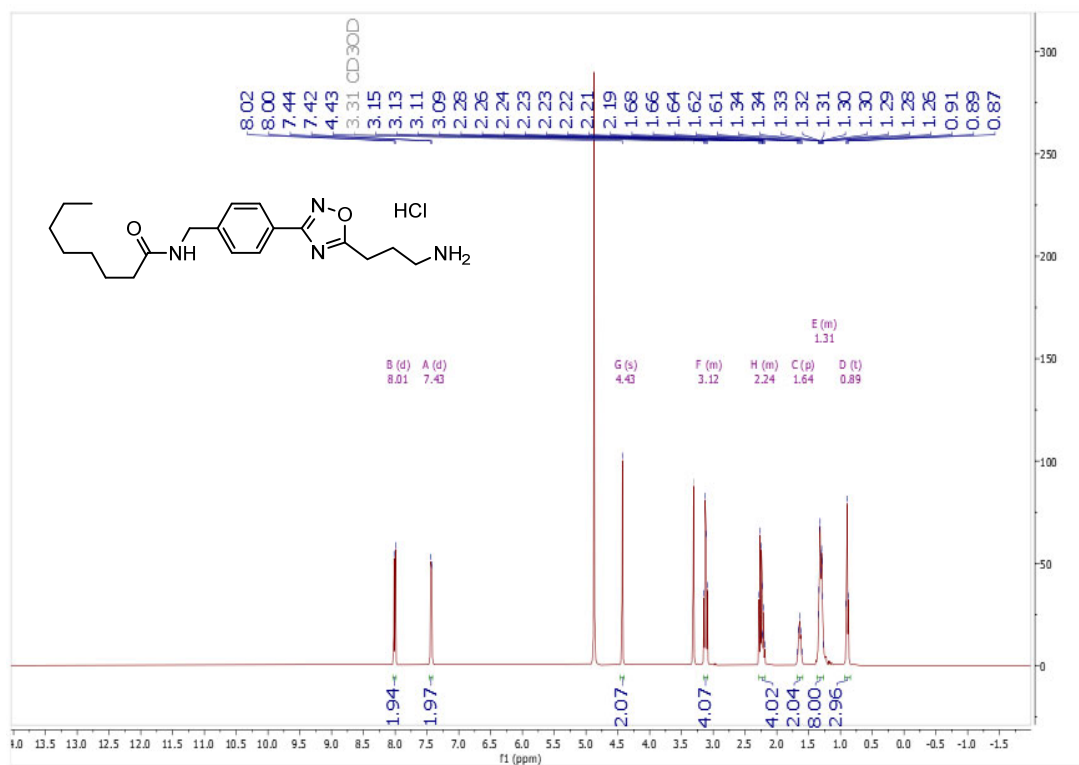

<sup>13</sup>C NMR (101 MHz, CD<sub>3</sub>OD) **72b**

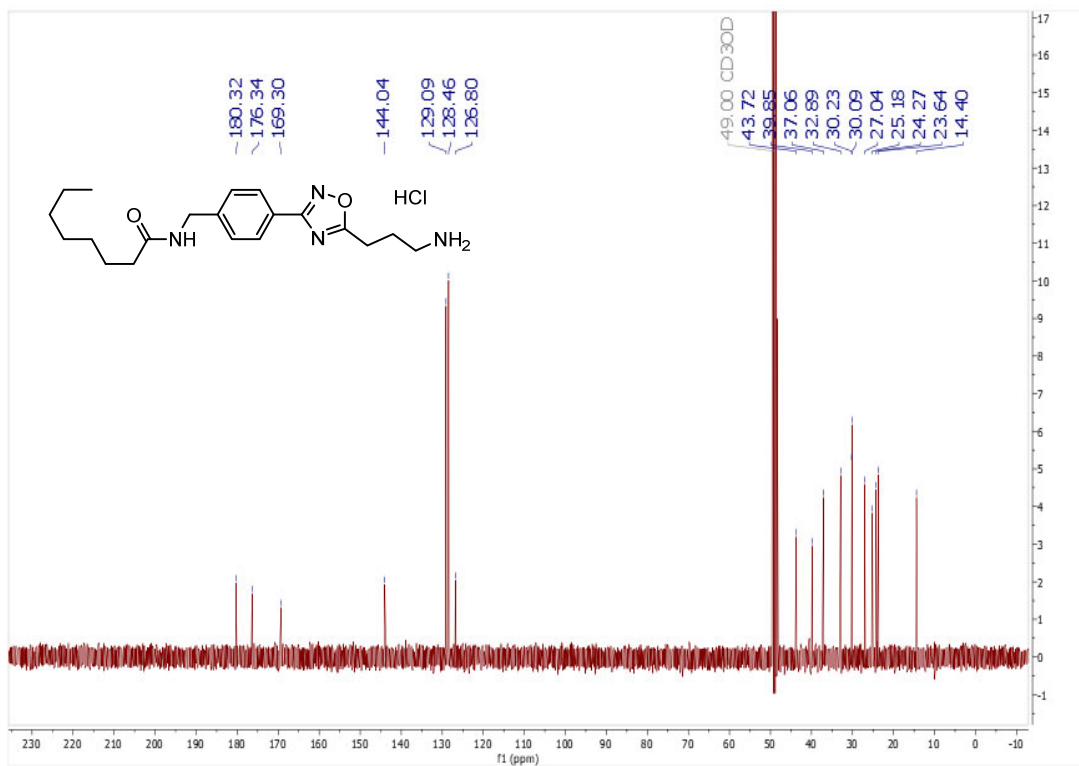

Supplement: NIHMS1849880-supplement-supporting_info.pdf [file NIHMS1849880-supplement-supporting_info.pdf]
